# Supplementary material for: A Lover and a Fighter: The Genome Sequence of an Entomopathogenic Nematode Heterorhabditis bacteriophora
Source: PLoS One. 2013 Jul 18;8(7):e69618. doi: 10.1371/journal.pone.0069618 (PMC3715494; doi:10.1371/journal.pone.0069618)
Supplement: Table S1 — Predicted gene models in Heterorhabditis bacteriophora genome. (XLSX) [file pone.0069618.s001.xlsx]

## Sheet: Sheet1
contig0000	jigsaw-2	gene	439	1058	.	+	.	ID=Hbgene00001;Name=Hbgene00001
contig0000	jigsaw-2	mRNA	439	1058	.	+	.	ID=HbmRNA00001;Parent=Hbgene00001
contig0000	jigsaw-2	CDS	439	453	-3.9304	+	0	ID=Hbcds00001.1;Parent=HbmRNA00001
contig0000	jigsaw-2	CDS	467	476	-31.5026	+	0	ID=Hbcds00001.2;Parent=HbmRNA00001
contig0000	jigsaw-2	CDS	491	640	-29.4448	+	2	ID=Hbcds00001.3;Parent=HbmRNA00001
contig0000	jigsaw-2	CDS	654	737	-29.1594	+	2	ID=Hbcds00001.4;Parent=HbmRNA00001
contig0000	jigsaw-2	CDS	751	768	-29.2113	+	2	ID=Hbcds00001.5;Parent=HbmRNA00001
contig0000	jigsaw-2	CDS	787	804	-31.8044	+	2	ID=Hbcds00001.6;Parent=HbmRNA00001
contig0000	jigsaw-2	CDS	819	889	-31.9077	+	2	ID=Hbcds00001.7;Parent=HbmRNA00001
contig0000	jigsaw-2	CDS	901	906	-31.9815	+	0	ID=Hbcds00001.8;Parent=HbmRNA00001
contig0000	jigsaw-2	CDS	924	937	-31.873	+	0	ID=Hbcds00001.9;Parent=HbmRNA00001
contig0000	jigsaw-2	CDS	953	979	-31.9311	+	1	ID=Hbcds00001.10;Parent=HbmRNA00001
contig0000	jigsaw-2	CDS	993	994	-32.1111	+	1	ID=Hbcds00001.11;Parent=HbmRNA00001
contig0000	jigsaw-2	CDS	1012	1058	-32.4307	+	2	ID=Hbcds00001.12;Parent=HbmRNA00001
contig0001	jigsaw-2	gene	2270	3331	.	+	.	ID=Hbgene00002;Name=Hbgene00002
contig0001	jigsaw-2	mRNA	2270	3331	.	+	.	ID=HbmRNA00002;Parent=Hbgene00002
contig0001	jigsaw-2	CDS	2270	2300	-6.28823	+	0	ID=Hbcds00002.1;Parent=HbmRNA00002
contig0001	jigsaw-2	CDS	2322	2363	-34.9762	+	2	ID=Hbcds00002.2;Parent=HbmRNA00002
contig0001	jigsaw-2	CDS	2381	2400	-31.569	+	2	ID=Hbcds00002.3;Parent=HbmRNA00002
contig0001	jigsaw-2	CDS	2435	2455	-44.2903	+	0	ID=Hbcds00002.4;Parent=HbmRNA00002
contig0001	jigsaw-2	CDS	2574	2585	-35.7491	+	0	ID=Hbcds00002.5;Parent=HbmRNA00002
contig0001	jigsaw-2	CDS	3167	3256	-33.7784	+	0	ID=Hbcds00002.6;Parent=HbmRNA00002
contig0001	jigsaw-2	CDS	3329	3331	-12.4524	+	0	ID=Hbcds00002.7;Parent=HbmRNA00002
contig0001	jigsaw-2	gene	3483	5858	.	+	.	ID=Hbgene00003;Name=Hbgene00003
contig0001	jigsaw-2	mRNA	3483	5858	.	+	.	ID=HbmRNA00003;Parent=Hbgene00003
contig0001	jigsaw-2	CDS	3483	3489	-22.5128	+	0	ID=Hbcds00003.1;Parent=HbmRNA00003
contig0001	jigsaw-2	CDS	3503	3530	-33.3103	+	2	ID=Hbcds00003.2;Parent=HbmRNA00003
contig0001	jigsaw-2	CDS	3869	3943	-37.636	+	1	ID=Hbcds00003.3;Parent=HbmRNA00003
contig0001	jigsaw-2	CDS	4082	4130	-5.27757	+	1	ID=Hbcds00003.4;Parent=HbmRNA00003
contig0001	jigsaw-2	CDS	4518	4554	5.13267	+	0	ID=Hbcds00003.5;Parent=HbmRNA00003
contig0001	jigsaw-2	CDS	4591	4609	11.4667	+	2	ID=Hbcds00003.6;Parent=HbmRNA00003
contig0001	jigsaw-2	CDS	4627	4762	-15.1909	+	1	ID=Hbcds00003.7;Parent=HbmRNA00003
contig0001	jigsaw-2	CDS	4923	4933	-39.2418	+	0	ID=Hbcds00003.8;Parent=HbmRNA00003
contig0001	jigsaw-2	CDS	5230	5265	-34.7218	+	1	ID=Hbcds00003.9;Parent=HbmRNA00003
contig0001	jigsaw-2	CDS	5471	5474	-28.0167	+	1	ID=Hbcds00003.10;Parent=HbmRNA00003
contig0001	jigsaw-2	CDS	5505	5511	-44.7614	+	0	ID=Hbcds00003.11;Parent=HbmRNA00003
contig0001	jigsaw-2	CDS	5522	5528	-41.587	+	2	ID=Hbcds00003.12;Parent=HbmRNA00003
contig0001	jigsaw-2	CDS	5728	5752	-31.7121	+	1	ID=Hbcds00003.13;Parent=HbmRNA00003
contig0001	jigsaw-2	CDS	5829	5858	1.61678	+	0	ID=Hbcds00003.14;Parent=HbmRNA00003
contig0001	jigsaw-2	gene	6349	7151	.	+	.	ID=Hbgene00004;Name=Hbgene00004
contig0001	jigsaw-2	mRNA	6349	7151	.	+	.	ID=HbmRNA00004;Parent=Hbgene00004
contig0001	jigsaw-2	CDS	6349	6354	-18.5529	+	0	ID=Hbcds00004.1;Parent=HbmRNA00004
contig0001	jigsaw-2	CDS	6434	6561	-27.2781	+	0	ID=Hbcds00004.2;Parent=HbmRNA00004
contig0001	jigsaw-2	CDS	6613	6730	-38.0243	+	1	ID=Hbcds00004.3;Parent=HbmRNA00004
contig0001	jigsaw-2	CDS	6889	6941	-29.2844	+	0	ID=Hbcds00004.4;Parent=HbmRNA00004
contig0001	jigsaw-2	CDS	7127	7151	-8.4622	+	1	ID=Hbcds00004.5;Parent=HbmRNA00004
contig0001	jigsaw-2	gene	7288	7377	.	+	.	ID=Hbgene00005;Name=Hbgene00005
contig0001	jigsaw-2	mRNA	7288	7377	.	+	.	ID=HbmRNA00005;Parent=Hbgene00005
contig0001	jigsaw-2	CDS	7288	7377	2.30447	+	0	ID=Hbcds00005.1;Parent=HbmRNA00005
contig0001	jigsaw-2	gene	7737	9096	.	+	.	ID=Hbgene00006;Name=Hbgene00006
contig0001	jigsaw-2	mRNA	7737	9096	.	+	.	ID=HbmRNA00006;Parent=Hbgene00006
contig0001	jigsaw-2	CDS	7737	7764	32.8125	+	0	ID=Hbcds00006.1;Parent=HbmRNA00006
contig0001	jigsaw-2	CDS	7833	7840	-41.8539	+	2	ID=Hbcds00006.2;Parent=HbmRNA00006
contig0001	jigsaw-2	CDS	8009	8066	-8.70294	+	0	ID=Hbcds00006.3;Parent=HbmRNA00006
contig0001	jigsaw-2	CDS	8078	8159	-11.8254	+	2	ID=Hbcds00006.4;Parent=HbmRNA00006
contig0001	jigsaw-2	CDS	8280	8283	-23.8295	+	1	ID=Hbcds00006.5;Parent=HbmRNA00006
contig0001	jigsaw-2	CDS	8306	8328	0.449974	+	0	ID=Hbcds00006.6;Parent=HbmRNA00006
contig0001	jigsaw-2	CDS	8347	8394	-11.1748	+	1	ID=Hbcds00006.7;Parent=HbmRNA00006
contig0001	jigsaw-2	CDS	8418	8429	17.5	+	1	ID=Hbcds00006.8;Parent=HbmRNA00006
contig0001	jigsaw-2	CDS	8447	8474	23.9507	+	1	ID=Hbcds00006.9;Parent=HbmRNA00006
contig0001	jigsaw-2	CDS	8494	8523	24.4904	+	0	ID=Hbcds00006.10;Parent=HbmRNA00006
contig0001	jigsaw-2	CDS	8538	8557	-31.8	+	0	ID=Hbcds00006.11;Parent=HbmRNA00006
contig0001	jigsaw-2	CDS	8901	9096	8.80996	+	1	ID=Hbcds00006.12;Parent=HbmRNA00006
contig0001	jigsaw-2	gene	9171	10352	.	+	.	ID=Hbgene00007;Name=Hbgene00007
contig0001	jigsaw-2	mRNA	9171	10352	.	+	.	ID=HbmRNA00007;Parent=Hbgene00007
contig0001	jigsaw-2	CDS	9171	9325	14.1091	+	0	ID=Hbcds00007.1;Parent=HbmRNA00007
contig0001	jigsaw-2	CDS	9651	9744	9.69995	+	1	ID=Hbcds00007.2;Parent=HbmRNA00007
contig0001	jigsaw-2	CDS	10101	10140	29.3418	+	0	ID=Hbcds00007.3;Parent=HbmRNA00007
contig0001	jigsaw-2	CDS	10336	10352	29.1667	+	2	ID=Hbcds00007.4;Parent=HbmRNA00007
contig0002	jigsaw-2	gene	12327	13596	.	+	.	ID=Hbgene00016;Name=Hbgene00016
contig0002	jigsaw-2	mRNA	12327	13596	.	+	.	ID=HbmRNA00016;Parent=Hbgene00016
contig0002	jigsaw-2	CDS	12327	12533	11.8377	+	0	ID=Hbcds00016.1;Parent=HbmRNA00016
contig0002	jigsaw-2	CDS	13032	13032	-23.6944	+	0	ID=Hbcds00016.2;Parent=HbmRNA00016
contig0002	jigsaw-2	CDS	13577	13596	-11.6277	+	2	ID=Hbcds00016.3;Parent=HbmRNA00016
contig0002	jigsaw-2	gene	14204	16910	.	-	.	ID=Hbgene00017;Name=Hbgene00017
contig0002	jigsaw-2	mRNA	14204	16910	.	-	.	ID=HbmRNA00017;Parent=Hbgene00017
contig0002	jigsaw-2	CDS	14204	14228	31.5714	-	1	ID=Hbcds00017.1;Parent=HbmRNA00017
contig0002	jigsaw-2	CDS	14349	14373	-25.4026	-	2	ID=Hbcds00017.2;Parent=HbmRNA00017
contig0002	jigsaw-2	CDS	14418	14526	4.5414	-	0	ID=Hbcds00017.3;Parent=HbmRNA00017
contig0002	jigsaw-2	CDS	14669	14800	-27.5395	-	0	ID=Hbcds00017.4;Parent=HbmRNA00017
contig0002	jigsaw-2	CDS	15007	15056	14.1724	-	2	ID=Hbcds00017.5;Parent=HbmRNA00017
contig0002	jigsaw-2	CDS	15272	15320	30.7174	-	0	ID=Hbcds00017.6;Parent=HbmRNA00017
contig0002	jigsaw-2	CDS	15393	15415	-41.1765	-	2	ID=Hbcds00017.7;Parent=HbmRNA00017
contig0002	jigsaw-2	CDS	15683	15746	28.706	-	0	ID=Hbcds00017.8;Parent=HbmRNA00017
contig0002	jigsaw-2	CDS	15784	15862	-31.2653	-	1	ID=Hbcds00017.9;Parent=HbmRNA00017
contig0002	jigsaw-2	CDS	16535	16617	-24	-	0	ID=Hbcds00017.10;Parent=HbmRNA00017
contig0002	jigsaw-2	CDS	16905	16910	25.5	-	0	ID=Hbcds00017.11;Parent=HbmRNA00017
contig0002	jigsaw-2	gene	17059	17707	.	-	.	ID=Hbgene00018;Name=Hbgene00018
contig0002	jigsaw-2	mRNA	17059	17707	.	-	.	ID=HbmRNA00018;Parent=Hbgene00018
contig0002	jigsaw-2	CDS	17059	17149	2.25	-	1	ID=Hbcds00018.1;Parent=HbmRNA00018
contig0002	jigsaw-2	CDS	17522	17601	-1.02132	-	0	ID=Hbcds00018.2;Parent=HbmRNA00018
contig0002	jigsaw-2	CDS	17612	17707	-4.8	-	0	ID=Hbcds00018.3;Parent=HbmRNA00018
contig0002	jigsaw-2	gene	18074	19007	.	+	.	ID=Hbgene00019;Name=Hbgene00019
contig0002	jigsaw-2	mRNA	18074	19007	.	+	.	ID=HbmRNA00019;Parent=Hbgene00019
contig0002	jigsaw-2	CDS	18074	18295	-0.188278	+	0	ID=Hbcds00019.1;Parent=HbmRNA00019
contig0002	jigsaw-2	CDS	18343	18438	-37.6164	+	0	ID=Hbcds00019.2;Parent=HbmRNA00019
contig0002	jigsaw-2	CDS	18496	18630	-28.4729	+	0	ID=Hbcds00019.3;Parent=HbmRNA00019
contig0002	jigsaw-2	CDS	18689	18778	-46.2943	+	0	ID=Hbcds00019.4;Parent=HbmRNA00019
contig0002	jigsaw-2	CDS	18822	18887	-31.4381	+	0	ID=Hbcds00019.5;Parent=HbmRNA00019
contig0002	jigsaw-2	CDS	18996	19007	-22.9545	+	0	ID=Hbcds00019.6;Parent=HbmRNA00019
contig0002	jigsaw-2	gene	19140	21104	.	-	.	ID=Hbgene00020;Name=Hbgene00020
contig0002	jigsaw-2	mRNA	19140	21104	.	-	.	ID=HbmRNA00020;Parent=Hbgene00020
contig0002	jigsaw-2	CDS	19140	19160	2	-	0	ID=Hbcds00020.1;Parent=HbmRNA00020
contig0002	jigsaw-2	CDS	19192	19197	16.8657	-	0	ID=Hbcds00020.2;Parent=HbmRNA00020
contig0002	jigsaw-2	CDS	19259	19270	-25.5855	-	0	ID=Hbcds00020.3;Parent=HbmRNA00020
contig0002	jigsaw-2	CDS	19348	19449	-18.7372	-	0	ID=Hbcds00020.4;Parent=HbmRNA00020
contig0002	jigsaw-2	CDS	19533	19631	-29.9857	-	0	ID=Hbcds00020.5;Parent=HbmRNA00020
contig0002	jigsaw-2	CDS	19697	19768	-25.2088	-	0	ID=Hbcds00020.6;Parent=HbmRNA00020
contig0002	jigsaw-2	CDS	19828	19935	-30.8547	-	0	ID=Hbcds00020.7;Parent=HbmRNA00020
contig0002	jigsaw-2	CDS	20011	20161	-29.2127	-	1	ID=Hbcds00020.8;Parent=HbmRNA00020
contig0002	jigsaw-2	CDS	20298	20425	-29.8397	-	0	ID=Hbcds00020.9;Parent=HbmRNA00020
contig0002	jigsaw-2	CDS	20509	20671	-11.5332	-	1	ID=Hbcds00020.10;Parent=HbmRNA00020
contig0002	jigsaw-2	CDS	20917	21104	-10	-	0	ID=Hbcds00020.11;Parent=HbmRNA00020
contig0002	jigsaw-2	gene	21575	22205	.	-	.	ID=Hbgene00021;Name=Hbgene00021
contig0002	jigsaw-2	mRNA	21575	22205	.	-	.	ID=HbmRNA00021;Parent=Hbgene00021
contig0002	jigsaw-2	CDS	21575	21724	0.999935	-	0	ID=Hbcds00021.1;Parent=HbmRNA00021
contig0002	jigsaw-2	CDS	21839	21979	-24.7024	-	0	ID=Hbcds00021.2;Parent=HbmRNA00021
contig0002	jigsaw-2	CDS	22191	22205	-30	-	0	ID=Hbcds00021.3;Parent=HbmRNA00021
contig0002	jigsaw-2	gene	23046	24330	.	+	.	ID=Hbgene00022;Name=Hbgene00022
contig0002	jigsaw-2	mRNA	23046	24330	.	+	.	ID=HbmRNA00022;Parent=Hbgene00022
contig0002	jigsaw-2	CDS	23046	23140	-20.4	+	0	ID=Hbcds00022.1;Parent=HbmRNA00022
contig0002	jigsaw-2	CDS	23233	23341	-36.5395	+	1	ID=Hbcds00022.2;Parent=HbmRNA00022
contig0002	jigsaw-2	CDS	23412	23660	-33.4633	+	0	ID=Hbcds00022.3;Parent=HbmRNA00022
contig0002	jigsaw-2	CDS	23953	24069	-30.9432	+	0	ID=Hbcds00022.4;Parent=HbmRNA00022
contig0002	jigsaw-2	CDS	24121	24180	-41.5952	+	0	ID=Hbcds00022.5;Parent=HbmRNA00022
contig0002	jigsaw-2	CDS	24244	24330	11.8071	+	0	ID=Hbcds00022.6;Parent=HbmRNA00022
contig0002	jigsaw-2	gene	25318	26399	.	+	.	ID=Hbgene00023;Name=Hbgene00023
contig0002	jigsaw-2	mRNA	25318	26399	.	+	.	ID=HbmRNA00023;Parent=Hbgene00023
contig0002	jigsaw-2	CDS	25318	25431	-22.3057	+	0	ID=Hbcds00023.1;Parent=HbmRNA00023
contig0002	jigsaw-2	CDS	25681	25871	-26.4839	+	0	ID=Hbcds00023.2;Parent=HbmRNA00023
contig0002	jigsaw-2	CDS	26396	26399	0	+	1	ID=Hbcds00023.3;Parent=HbmRNA00023
contig0002	jigsaw-2	gene	30637	32640	.	-	.	ID=Hbgene00024;Name=Hbgene00024
contig0002	jigsaw-2	mRNA	30637	32640	.	-	.	ID=HbmRNA00024;Parent=Hbgene00024
contig0002	jigsaw-2	CDS	30637	30757	32.2093	-	1	ID=Hbcds00024.1;Parent=HbmRNA00024
contig0002	jigsaw-2	CDS	32555	32640	0	-	0	ID=Hbcds00024.2;Parent=HbmRNA00024
contig0002	jigsaw-2	gene	845	1239	.	+	.	ID=Hbgene00008;Name=Hbgene00008
contig0002	jigsaw-2	mRNA	845	1239	.	+	.	ID=HbmRNA00008;Parent=Hbgene00008
contig0002	jigsaw-2	CDS	845	960	-7.89532	+	0	ID=Hbcds00008.1;Parent=HbmRNA00008
contig0002	jigsaw-2	CDS	1021	1078	-26.4029	+	1	ID=Hbcds00008.2;Parent=HbmRNA00008
contig0002	jigsaw-2	CDS	1093	1239	1.97968	+	0	ID=Hbcds00008.3;Parent=HbmRNA00008
contig0002	jigsaw-2	gene	33096	35847	.	+	.	ID=Hbgene00025;Name=Hbgene00025
contig0002	jigsaw-2	mRNA	33096	35847	.	+	.	ID=HbmRNA00025;Parent=Hbgene00025
contig0002	jigsaw-2	CDS	33096	33153	17.9033	+	0	ID=Hbcds00025.1;Parent=HbmRNA00025
contig0002	jigsaw-2	CDS	33316	33346	-27.1774	+	2	ID=Hbcds00025.2;Parent=HbmRNA00025
contig0002	jigsaw-2	CDS	33586	33685	15.6632	+	1	ID=Hbcds00025.3;Parent=HbmRNA00025
contig0002	jigsaw-2	CDS	34067	34174	-43.5	+	0	ID=Hbcds00025.4;Parent=HbmRNA00025
contig0002	jigsaw-2	CDS	34781	34808	-26.5714	+	0	ID=Hbcds00025.5;Parent=HbmRNA00025
contig0002	jigsaw-2	CDS	35810	35847	16.8462	+	2	ID=Hbcds00025.6;Parent=HbmRNA00025
contig0002	jigsaw-2	gene	1638	2529	.	-	.	ID=Hbgene00009;Name=Hbgene00009
contig0002	jigsaw-2	mRNA	1638	2529	.	-	.	ID=HbmRNA00009;Parent=Hbgene00009
contig0002	jigsaw-2	CDS	1638	1682	-26.5455	-	0	ID=Hbcds00009.1;Parent=HbmRNA00009
contig0002	jigsaw-2	CDS	1840	1971	-41.5864	-	0	ID=Hbcds00009.2;Parent=HbmRNA00009
contig0002	jigsaw-2	CDS	2068	2151	-35.9886	-	0	ID=Hbcds00009.3;Parent=HbmRNA00009
contig0002	jigsaw-2	CDS	2479	2529	1.33333	-	0	ID=Hbcds00009.4;Parent=HbmRNA00009
contig0002	jigsaw-2	gene	2654	3674	.	-	.	ID=Hbgene00010;Name=Hbgene00010
contig0002	jigsaw-2	mRNA	2654	3674	.	-	.	ID=HbmRNA00010;Parent=Hbgene00010
contig0002	jigsaw-2	CDS	2654	2658	0	-	2	ID=Hbcds00010.1;Parent=HbmRNA00010
contig0002	jigsaw-2	CDS	2670	2704	-42.8125	-	1	ID=Hbcds00010.2;Parent=HbmRNA00010
contig0002	jigsaw-2	CDS	2734	2760	0	-	1	ID=Hbcds00010.3;Parent=HbmRNA00010
contig0002	jigsaw-2	CDS	2809	2930	-28.6207	-	0	ID=Hbcds00010.4;Parent=HbmRNA00010
contig0002	jigsaw-2	CDS	3037	3432	-2.7016	-	0	ID=Hbcds00010.5;Parent=HbmRNA00010
contig0002	jigsaw-2	CDS	3588	3674	-8.03413	-	0	ID=Hbcds00010.6;Parent=HbmRNA00010
contig0002	jigsaw-2	gene	3699	7062	.	-	.	ID=Hbgene00011;Name=Hbgene00011
contig0002	jigsaw-2	mRNA	3699	7062	.	-	.	ID=HbmRNA00011;Parent=Hbgene00011
contig0002	jigsaw-2	CDS	3699	3955	17.9417	-	2	ID=Hbcds00011.1;Parent=HbmRNA00011
contig0002	jigsaw-2	CDS	6620	6812	32.1289	-	0	ID=Hbcds00011.2;Parent=HbmRNA00011
contig0002	jigsaw-2	CDS	6862	7062	25.8006	-	0	ID=Hbcds00011.3;Parent=HbmRNA00011
contig0002	jigsaw-2	gene	7224	7713	.	-	.	ID=Hbgene00012;Name=Hbgene00012
contig0002	jigsaw-2	mRNA	7224	7713	.	-	.	ID=HbmRNA00012;Parent=Hbgene00012
contig0002	jigsaw-2	CDS	7224	7414	28.9062	-	2	ID=Hbcds00012.1;Parent=HbmRNA00012
contig0002	jigsaw-2	CDS	7599	7651	16.5	-	1	ID=Hbcds00012.2;Parent=HbmRNA00012
contig0002	jigsaw-2	CDS	7706	7713	16.0084	-	0	ID=Hbcds00012.3;Parent=HbmRNA00012
contig0002	jigsaw-2	gene	8175	9854	.	+	.	ID=Hbgene00013;Name=Hbgene00013
contig0002	jigsaw-2	mRNA	8175	9854	.	+	.	ID=HbmRNA00013;Parent=Hbgene00013
contig0002	jigsaw-2	CDS	8175	8279	-33.4963	+	0	ID=Hbcds00013.1;Parent=HbmRNA00013
contig0002	jigsaw-2	CDS	9663	9854	-7.13889	+	0	ID=Hbcds00013.2;Parent=HbmRNA00013
contig0002	jigsaw-2	gene	9922	10188	.	+	.	ID=Hbgene00014;Name=Hbgene00014
contig0002	jigsaw-2	mRNA	9922	10188	.	+	.	ID=HbmRNA00014;Parent=Hbgene00014
contig0002	jigsaw-2	CDS	9922	9994	-13.8656	+	0	ID=Hbcds00014.1;Parent=HbmRNA00014
contig0002	jigsaw-2	CDS	10109	10188	-3.94556	+	2	ID=Hbcds00014.2;Parent=HbmRNA00014
contig0002	jigsaw-2	gene	10479	11436	.	+	.	ID=Hbgene00015;Name=Hbgene00015
contig0002	jigsaw-2	mRNA	10479	11436	.	+	.	ID=HbmRNA00015;Parent=Hbgene00015
contig0002	jigsaw-2	CDS	10479	10586	-14	+	0	ID=Hbcds00015.1;Parent=HbmRNA00015
contig0002	jigsaw-2	CDS	11164	11260	-15.9684	+	0	ID=Hbcds00015.2;Parent=HbmRNA00015
contig0002	jigsaw-2	CDS	11387	11436	-9.26623	+	2	ID=Hbcds00015.3;Parent=HbmRNA00015
contig0003	jigsaw-2	gene	6	871	.	+	.	ID=Hbgene00026;Name=Hbgene00026
contig0003	jigsaw-2	mRNA	6	871	.	+	.	ID=HbmRNA00026;Parent=Hbgene00026
contig0003	jigsaw-2	CDS	6	212	28.2577	+	0	ID=Hbcds00026.1;Parent=HbmRNA00026
contig0003	jigsaw-2	CDS	225	246	17.8896	+	0	ID=Hbcds00026.2;Parent=HbmRNA00026
contig0003	jigsaw-2	CDS	275	328	34.2712	+	2	ID=Hbcds00026.3;Parent=HbmRNA00026
contig0003	jigsaw-2	CDS	340	635	29.9669	+	2	ID=Hbcds00026.4;Parent=HbmRNA00026
contig0003	jigsaw-2	CDS	652	667	8.82301	+	0	ID=Hbcds00026.5;Parent=HbmRNA00026
contig0003	jigsaw-2	CDS	699	871	33.157	+	2	ID=Hbcds00026.6;Parent=HbmRNA00026
contig0003	jigsaw-2	gene	920	1200	.	+	.	ID=Hbgene00027;Name=Hbgene00027
contig0003	jigsaw-2	mRNA	920	1200	.	+	.	ID=HbmRNA00027;Parent=Hbgene00027
contig0003	jigsaw-2	CDS	920	932	32.3077	+	0	ID=Hbcds00027.1;Parent=HbmRNA00027
contig0003	jigsaw-2	CDS	946	1009	34.4062	+	2	ID=Hbcds00027.2;Parent=HbmRNA00027
contig0003	jigsaw-2	CDS	1028	1058	33.8387	+	1	ID=Hbcds00027.3;Parent=HbmRNA00027
contig0003	jigsaw-2	CDS	1075	1178	34.6284	+	0	ID=Hbcds00027.4;Parent=HbmRNA00027
contig0003	jigsaw-2	CDS	1191	1200	31.4133	+	1	ID=Hbcds00027.5;Parent=HbmRNA00027
contig0004	jigsaw-2	gene	295	2901	.	+	.	ID=Hbgene00028;Name=Hbgene00028
contig0004	jigsaw-2	mRNA	295	2901	.	+	.	ID=HbmRNA00028;Parent=Hbgene00028
contig0004	jigsaw-2	CDS	295	318	33.2857	+	0	ID=Hbcds00028.1;Parent=HbmRNA00028
contig0004	jigsaw-2	CDS	329	630	9.29765	+	0	ID=Hbcds00028.2;Parent=HbmRNA00028
contig0004	jigsaw-2	CDS	647	899	6.32106	+	1	ID=Hbcds00028.3;Parent=HbmRNA00028
contig0004	jigsaw-2	CDS	911	1047	23.9018	+	0	ID=Hbcds00028.4;Parent=HbmRNA00028
contig0004	jigsaw-2	CDS	1062	1102	34.0314	+	1	ID=Hbcds00028.5;Parent=HbmRNA00028
contig0004	jigsaw-2	CDS	1121	1192	14.8784	+	2	ID=Hbcds00028.6;Parent=HbmRNA00028
contig0004	jigsaw-2	CDS	1293	1337	34.0398	+	2	ID=Hbcds00028.7;Parent=HbmRNA00028
contig0004	jigsaw-2	CDS	1350	1385	34	+	2	ID=Hbcds00028.8;Parent=HbmRNA00028
contig0004	jigsaw-2	CDS	1417	1424	17.5	+	2	ID=Hbcds00028.9;Parent=HbmRNA00028
contig0004	jigsaw-2	CDS	1472	1500	25.7125	+	0	ID=Hbcds00028.10;Parent=HbmRNA00028
contig0004	jigsaw-2	CDS	1511	1546	25.2474	+	1	ID=Hbcds00028.11;Parent=HbmRNA00028
contig0004	jigsaw-2	CDS	2274	2376	-31.7567	+	1	ID=Hbcds00028.12;Parent=HbmRNA00028
contig0004	jigsaw-2	CDS	2395	2502	-15.3653	+	0	ID=Hbcds00028.13;Parent=HbmRNA00028
contig0004	jigsaw-2	CDS	2541	2565	14.4462	+	0	ID=Hbcds00028.14;Parent=HbmRNA00028
contig0004	jigsaw-2	CDS	2606	2692	31.3631	+	2	ID=Hbcds00028.15;Parent=HbmRNA00028
contig0004	jigsaw-2	CDS	2715	2723	-26.0469	+	2	ID=Hbcds00028.16;Parent=HbmRNA00028
contig0004	jigsaw-2	CDS	2735	2901	24.6007	+	2	ID=Hbcds00028.17;Parent=HbmRNA00028
contig0004	jigsaw-2	gene	3098	3272	.	+	.	ID=Hbgene00029;Name=Hbgene00029
contig0004	jigsaw-2	mRNA	3098	3272	.	+	.	ID=HbmRNA00029;Parent=Hbgene00029
contig0004	jigsaw-2	CDS	3098	3272	2.21562	+	0	ID=Hbcds00029.1;Parent=HbmRNA00029
contig0005	jigsaw-2	gene	7640	7789	.	-	.	ID=Hbgene00036;Name=Hbgene00036
contig0005	jigsaw-2	mRNA	7640	7789	.	-	.	ID=HbmRNA00036;Parent=Hbgene00036
contig0005	jigsaw-2	CDS	7640	7789	33.771	-	0	ID=Hbcds00036.1;Parent=HbmRNA00036
contig0005	jigsaw-2	gene	2974	4891	.	+	.	ID=Hbgene00030;Name=Hbgene00030
contig0005	jigsaw-2	mRNA	2974	4891	.	+	.	ID=HbmRNA00030;Parent=Hbgene00030
contig0005	jigsaw-2	CDS	2974	3033	10.742	+	0	ID=Hbcds00030.1;Parent=HbmRNA00030
contig0005	jigsaw-2	CDS	3293	3332	12.2555	+	0	ID=Hbcds00030.2;Parent=HbmRNA00030
contig0005	jigsaw-2	CDS	3736	3747	20.2782	+	2	ID=Hbcds00030.3;Parent=HbmRNA00030
contig0005	jigsaw-2	CDS	3862	3863	-22.9781	+	2	ID=Hbcds00030.4;Parent=HbmRNA00030
contig0005	jigsaw-2	CDS	3904	4098	6.79426	+	0	ID=Hbcds00030.5;Parent=HbmRNA00030
contig0005	jigsaw-2	CDS	4130	4145	-14.6255	+	0	ID=Hbcds00030.6;Parent=HbmRNA00030
contig0005	jigsaw-2	CDS	4267	4335	14.8157	+	2	ID=Hbcds00030.7;Parent=HbmRNA00030
contig0005	jigsaw-2	CDS	4405	4478	23.2208	+	2	ID=Hbcds00030.8;Parent=HbmRNA00030
contig0005	jigsaw-2	CDS	4648	4724	2.71677	+	0	ID=Hbcds00030.9;Parent=HbmRNA00030
contig0005	jigsaw-2	CDS	4792	4795	17.5	+	1	ID=Hbcds00030.10;Parent=HbmRNA00030
contig0005	jigsaw-2	CDS	4856	4891	32.6107	+	0	ID=Hbcds00030.11;Parent=HbmRNA00030
contig0005	jigsaw-2	gene	4923	5294	.	+	.	ID=Hbgene00031;Name=Hbgene00031
contig0005	jigsaw-2	mRNA	4923	5294	.	+	.	ID=HbmRNA00031;Parent=Hbgene00031
contig0005	jigsaw-2	CDS	4923	4953	15.6634	+	0	ID=Hbcds00031.1;Parent=HbmRNA00031
contig0005	jigsaw-2	CDS	5057	5170	-4.72607	+	2	ID=Hbcds00031.2;Parent=HbmRNA00031
contig0005	jigsaw-2	CDS	5251	5294	25.3557	+	2	ID=Hbcds00031.3;Parent=HbmRNA00031
contig0005	jigsaw-2	gene	5368	6559	.	-	.	ID=Hbgene00032;Name=Hbgene00032
contig0005	jigsaw-2	mRNA	5368	6559	.	-	.	ID=HbmRNA00032;Parent=Hbgene00032
contig0005	jigsaw-2	CDS	5368	5391	30.5342	-	0	ID=Hbcds00032.1;Parent=HbmRNA00032
contig0005	jigsaw-2	CDS	5413	5487	5.85495	-	0	ID=Hbcds00032.2;Parent=HbmRNA00032
contig0005	jigsaw-2	CDS	5546	5672	30.1158	-	1	ID=Hbcds00032.3;Parent=HbmRNA00032
contig0005	jigsaw-2	CDS	5684	5704	24.3333	-	1	ID=Hbcds00032.4;Parent=HbmRNA00032
contig0005	jigsaw-2	CDS	5733	5863	32.2388	-	0	ID=Hbcds00032.5;Parent=HbmRNA00032
contig0005	jigsaw-2	CDS	5927	5962	31.47	-	0	ID=Hbcds00032.6;Parent=HbmRNA00032
contig0005	jigsaw-2	CDS	6252	6291	33.6541	-	1	ID=Hbcds00032.7;Parent=HbmRNA00032
contig0005	jigsaw-2	CDS	6313	6356	34.0278	-	0	ID=Hbcds00032.8;Parent=HbmRNA00032
contig0005	jigsaw-2	CDS	6470	6559	34.1033	-	0	ID=Hbcds00032.9;Parent=HbmRNA00032
contig0005	jigsaw-2	gene	6784	6936	.	-	.	ID=Hbgene00033;Name=Hbgene00033
contig0005	jigsaw-2	mRNA	6784	6936	.	-	.	ID=HbmRNA00033;Parent=Hbgene00033
contig0005	jigsaw-2	CDS	6784	6845	33.7168	-	2	ID=Hbcds00033.1;Parent=HbmRNA00033
contig0005	jigsaw-2	CDS	6888	6906	29.1667	-	0	ID=Hbcds00033.2;Parent=HbmRNA00033
contig0005	jigsaw-2	CDS	6919	6936	31.4	-	0	ID=Hbcds00033.3;Parent=HbmRNA00033
contig0005	jigsaw-2	gene	6962	7033	.	-	.	ID=Hbgene00034;Name=Hbgene00034
contig0005	jigsaw-2	mRNA	6962	7033	.	-	.	ID=HbmRNA00034;Parent=Hbgene00034
contig0005	jigsaw-2	CDS	6962	7033	33.5849	-	0	ID=Hbcds00034.1;Parent=HbmRNA00034
contig0005	jigsaw-2	gene	7223	7615	.	-	.	ID=Hbgene00035;Name=Hbgene00035
contig0005	jigsaw-2	mRNA	7223	7615	.	-	.	ID=HbmRNA00035;Parent=Hbgene00035
contig0005	jigsaw-2	CDS	7223	7307	34.192	-	1	ID=Hbcds00035.1;Parent=HbmRNA00035
contig0005	jigsaw-2	CDS	7362	7615	34.7293	-	0	ID=Hbcds00035.2;Parent=HbmRNA00035
contig0006	jigsaw-2	gene	29	1607	.	+	.	ID=Hbgene00037;Name=Hbgene00037
contig0006	jigsaw-2	mRNA	29	1607	.	+	.	ID=HbmRNA00037;Parent=Hbgene00037
contig0006	jigsaw-2	CDS	29	70	13.0979	+	0	ID=Hbcds00037.1;Parent=HbmRNA00037
contig0006	jigsaw-2	CDS	117	126	-9.09	+	0	ID=Hbcds00037.2;Parent=HbmRNA00037
contig0006	jigsaw-2	CDS	334	340	-24.1154	+	2	ID=Hbcds00037.3;Parent=HbmRNA00037
contig0006	jigsaw-2	CDS	495	625	15.7335	+	1	ID=Hbcds00037.4;Parent=HbmRNA00037
contig0006	jigsaw-2	CDS	809	870	-15.2321	+	2	ID=Hbcds00037.5;Parent=HbmRNA00037
contig0006	jigsaw-2	CDS	1012	1015	-35.3208	+	0	ID=Hbcds00037.6;Parent=HbmRNA00037
contig0006	jigsaw-2	CDS	1142	1163	-35.791	+	2	ID=Hbcds00037.7;Parent=HbmRNA00037
contig0006	jigsaw-2	CDS	1226	1275	-35.8485	+	1	ID=Hbcds00037.8;Parent=HbmRNA00037
contig0006	jigsaw-2	CDS	1594	1607	-8.55995	+	2	ID=Hbcds00037.9;Parent=HbmRNA00037
contig0006	jigsaw-2	gene	9449	10305	.	+	.	ID=Hbgene00044;Name=Hbgene00044
contig0006	jigsaw-2	mRNA	9449	10305	.	+	.	ID=HbmRNA00044;Parent=Hbgene00044
contig0006	jigsaw-2	CDS	9449	9506	28.5299	+	0	ID=Hbcds00044.1;Parent=HbmRNA00044
contig0006	jigsaw-2	CDS	9651	9675	-7.50474	+	2	ID=Hbcds00044.2;Parent=HbmRNA00044
contig0006	jigsaw-2	CDS	10005	10041	29.312	+	1	ID=Hbcds00044.3;Parent=HbmRNA00044
contig0006	jigsaw-2	CDS	10122	10214	15.8669	+	0	ID=Hbcds00044.4;Parent=HbmRNA00044
contig0006	jigsaw-2	CDS	10273	10305	-0.741876	+	0	ID=Hbcds00044.5;Parent=HbmRNA00044
contig0006	jigsaw-2	gene	10392	10939	.	-	.	ID=Hbgene00045;Name=Hbgene00045
contig0006	jigsaw-2	mRNA	10392	10939	.	-	.	ID=HbmRNA00045;Parent=Hbgene00045
contig0006	jigsaw-2	CDS	10392	10504	30.6752	-	2	ID=Hbcds00045.1;Parent=HbmRNA00045
contig0006	jigsaw-2	CDS	10562	10681	32.1481	-	2	ID=Hbcds00045.2;Parent=HbmRNA00045
contig0006	jigsaw-2	CDS	10855	10939	29.8687	-	0	ID=Hbcds00045.3;Parent=HbmRNA00045
contig0006	jigsaw-2	gene	11193	12472	.	-	.	ID=Hbgene00046;Name=Hbgene00046
contig0006	jigsaw-2	mRNA	11193	12472	.	-	.	ID=HbmRNA00046;Parent=Hbgene00046
contig0006	jigsaw-2	CDS	11193	11270	29.4501	-	0	ID=Hbcds00046.1;Parent=HbmRNA00046
contig0006	jigsaw-2	CDS	11373	11578	32.3828	-	2	ID=Hbcds00046.2;Parent=HbmRNA00046
contig0006	jigsaw-2	CDS	11592	11617	32.4759	-	1	ID=Hbcds00046.3;Parent=HbmRNA00046
contig0006	jigsaw-2	CDS	11639	11733	31.5284	-	0	ID=Hbcds00046.4;Parent=HbmRNA00046
contig0006	jigsaw-2	CDS	11785	11942	32.3978	-	2	ID=Hbcds00046.5;Parent=HbmRNA00046
contig0006	jigsaw-2	CDS	12065	12079	23.8013	-	2	ID=Hbcds00046.6;Parent=HbmRNA00046
contig0006	jigsaw-2	CDS	12091	12277	-2.55902	-	0	ID=Hbcds00046.7;Parent=HbmRNA00046
contig0006	jigsaw-2	CDS	12301	12381	11.8206	-	0	ID=Hbcds00046.8;Parent=HbmRNA00046
contig0006	jigsaw-2	CDS	12407	12472	-2.12353	-	0	ID=Hbcds00046.9;Parent=HbmRNA00046
contig0006	jigsaw-2	gene	12501	13311	.	-	.	ID=Hbgene00047;Name=Hbgene00047
contig0006	jigsaw-2	mRNA	12501	13311	.	-	.	ID=HbmRNA00047;Parent=Hbgene00047
contig0006	jigsaw-2	CDS	12501	12525	31.0763	-	1	ID=Hbcds00047.1;Parent=HbmRNA00047
contig0006	jigsaw-2	CDS	12696	12784	33.1622	-	0	ID=Hbcds00047.2;Parent=HbmRNA00047
contig0006	jigsaw-2	CDS	12872	12955	30.0299	-	0	ID=Hbcds00047.3;Parent=HbmRNA00047
contig0006	jigsaw-2	CDS	13020	13207	14.3486	-	2	ID=Hbcds00047.4;Parent=HbmRNA00047
contig0006	jigsaw-2	CDS	13260	13311	31.3789	-	0	ID=Hbcds00047.5;Parent=HbmRNA00047
contig0006	jigsaw-2	gene	13370	13505	.	-	.	ID=Hbgene00048;Name=Hbgene00048
contig0006	jigsaw-2	mRNA	13370	13505	.	-	.	ID=HbmRNA00048;Parent=Hbgene00048
contig0006	jigsaw-2	CDS	13370	13505	16.1254	-	1	ID=Hbcds00048.1;Parent=HbmRNA00048
contig0006	jigsaw-2	gene	1651	1794	.	+	.	ID=Hbgene00038;Name=Hbgene00038
contig0006	jigsaw-2	mRNA	1651	1794	.	+	.	ID=HbmRNA00038;Parent=Hbgene00038
contig0006	jigsaw-2	CDS	1651	1794	-7.02421	+	0	ID=Hbcds00038.1;Parent=HbmRNA00038
contig0006	jigsaw-2	gene	1835	1983	.	-	.	ID=Hbgene00039;Name=Hbgene00039
contig0006	jigsaw-2	mRNA	1835	1983	.	-	.	ID=HbmRNA00039;Parent=Hbgene00039
contig0006	jigsaw-2	CDS	1835	1900	27.7014	-	0	ID=Hbcds00039.1;Parent=HbmRNA00039
contig0006	jigsaw-2	CDS	1975	1983	22.974	-	0	ID=Hbcds00039.2;Parent=HbmRNA00039
contig0006	jigsaw-2	gene	2078	2861	.	-	.	ID=Hbgene00040;Name=Hbgene00040
contig0006	jigsaw-2	mRNA	2078	2861	.	-	.	ID=HbmRNA00040;Parent=Hbgene00040
contig0006	jigsaw-2	CDS	2078	2168	33.9621	-	1	ID=Hbcds00040.1;Parent=HbmRNA00040
contig0006	jigsaw-2	CDS	2219	2254	32.1174	-	1	ID=Hbcds00040.2;Parent=HbmRNA00040
contig0006	jigsaw-2	CDS	2425	2489	33.8077	-	0	ID=Hbcds00040.3;Parent=HbmRNA00040
contig0006	jigsaw-2	CDS	2662	2790	32.9485	-	0	ID=Hbcds00040.4;Parent=HbmRNA00040
contig0006	jigsaw-2	CDS	2844	2861	26.2895	-	0	ID=Hbcds00040.5;Parent=HbmRNA00040
contig0006	jigsaw-2	gene	2893	3927	.	-	.	ID=Hbgene00041;Name=Hbgene00041
contig0006	jigsaw-2	mRNA	2893	3927	.	-	.	ID=HbmRNA00041;Parent=Hbgene00041
contig0006	jigsaw-2	CDS	2893	2943	31.5093	-	0	ID=Hbcds00041.1;Parent=HbmRNA00041
contig0006	jigsaw-2	CDS	3043	3057	18	-	0	ID=Hbcds00041.2;Parent=HbmRNA00041
contig0006	jigsaw-2	CDS	3165	3239	34.0853	-	0	ID=Hbcds00041.3;Parent=HbmRNA00041
contig0006	jigsaw-2	CDS	3294	3320	32.0929	-	0	ID=Hbcds00041.4;Parent=HbmRNA00041
contig0006	jigsaw-2	CDS	3619	3648	32.8583	-	0	ID=Hbcds00041.5;Parent=HbmRNA00041
contig0006	jigsaw-2	CDS	3660	3667	26.0355	-	2	ID=Hbcds00041.6;Parent=HbmRNA00041
contig0006	jigsaw-2	CDS	3737	3816	32.6414	-	1	ID=Hbcds00041.7;Parent=HbmRNA00041
contig0006	jigsaw-2	CDS	3902	3927	32.1123	-	0	ID=Hbcds00041.8;Parent=HbmRNA00041
contig0006	jigsaw-2	gene	5434	7729	.	+	.	ID=Hbgene00042;Name=Hbgene00042
contig0006	jigsaw-2	mRNA	5434	7729	.	+	.	ID=HbmRNA00042;Parent=Hbgene00042
contig0006	jigsaw-2	CDS	5434	5466	28.0738	+	0	ID=Hbcds00042.1;Parent=HbmRNA00042
contig0006	jigsaw-2	CDS	5499	5550	5.27957	+	0	ID=Hbcds00042.2;Parent=HbmRNA00042
contig0006	jigsaw-2	CDS	5702	5777	16.3917	+	2	ID=Hbcds00042.3;Parent=HbmRNA00042
contig0006	jigsaw-2	CDS	6220	6233	26.25	+	1	ID=Hbcds00042.4;Parent=HbmRNA00042
contig0006	jigsaw-2	CDS	6339	6364	12.8266	+	2	ID=Hbcds00042.5;Parent=HbmRNA00042
contig0006	jigsaw-2	CDS	6482	6598	-1.26618	+	0	ID=Hbcds00042.6;Parent=HbmRNA00042
contig0006	jigsaw-2	CDS	7109	7110	0	+	0	ID=Hbcds00042.7;Parent=HbmRNA00042
contig0006	jigsaw-2	CDS	7615	7729	27.0132	+	1	ID=Hbcds00042.8;Parent=HbmRNA00042
contig0006	jigsaw-2	gene	8538	8980	.	+	.	ID=Hbgene00043;Name=Hbgene00043
contig0006	jigsaw-2	mRNA	8538	8980	.	+	.	ID=HbmRNA00043;Parent=Hbgene00043
contig0006	jigsaw-2	CDS	8538	8618	27.7854	+	0	ID=Hbcds00043.1;Parent=HbmRNA00043
contig0006	jigsaw-2	CDS	8927	8980	20.2515	+	0	ID=Hbcds00043.2;Parent=HbmRNA00043
contig0007	jigsaw-2	gene	83	311	.	-	.	ID=Hbgene00049;Name=Hbgene00049
contig0007	jigsaw-2	mRNA	83	311	.	-	.	ID=HbmRNA00049;Parent=Hbgene00049
contig0007	jigsaw-2	CDS	83	208	32.0417	-	0	ID=Hbcds00049.1;Parent=HbmRNA00049
contig0007	jigsaw-2	CDS	243	311	28.5528	-	0	ID=Hbcds00049.2;Parent=HbmRNA00049
contig0007	jigsaw-2	gene	646	1306	.	-	.	ID=Hbgene00050;Name=Hbgene00050
contig0007	jigsaw-2	mRNA	646	1306	.	-	.	ID=HbmRNA00050;Parent=Hbgene00050
contig0007	jigsaw-2	CDS	646	750	31.6559	-	0	ID=Hbcds00050.1;Parent=HbmRNA00050
contig0007	jigsaw-2	CDS	798	1007	33.1491	-	0	ID=Hbcds00050.2;Parent=HbmRNA00050
contig0007	jigsaw-2	CDS	1063	1084	27.2261	-	1	ID=Hbcds00050.3;Parent=HbmRNA00050
contig0007	jigsaw-2	CDS	1125	1306	1.52256	-	0	ID=Hbcds00050.4;Parent=HbmRNA00050
contig0007	jigsaw-2	gene	1370	1599	.	+	.	ID=Hbgene00051;Name=Hbgene00051
contig0007	jigsaw-2	mRNA	1370	1599	.	+	.	ID=HbmRNA00051;Parent=Hbgene00051
contig0007	jigsaw-2	CDS	1370	1461	17.1489	+	0	ID=Hbcds00051.1;Parent=HbmRNA00051
contig0007	jigsaw-2	CDS	1578	1599	13.6724	+	1	ID=Hbcds00051.2;Parent=HbmRNA00051
contig0007	jigsaw-2	gene	1698	6021	.	-	.	ID=Hbgene00052;Name=Hbgene00052
contig0007	jigsaw-2	mRNA	1698	6021	.	-	.	ID=HbmRNA00052;Parent=Hbgene00052
contig0007	jigsaw-2	CDS	1698	1713	30	-	1	ID=Hbcds00052.1;Parent=HbmRNA00052
contig0007	jigsaw-2	CDS	1808	1966	34.2074	-	1	ID=Hbcds00052.2;Parent=HbmRNA00052
contig0007	jigsaw-2	CDS	2588	2644	31.8568	-	1	ID=Hbcds00052.3;Parent=HbmRNA00052
contig0007	jigsaw-2	CDS	2688	2818	33.7957	-	0	ID=Hbcds00052.4;Parent=HbmRNA00052
contig0007	jigsaw-2	CDS	2930	2965	29.9518	-	0	ID=Hbcds00052.5;Parent=HbmRNA00052
contig0007	jigsaw-2	CDS	3360	3483	34.0036	-	1	ID=Hbcds00052.6;Parent=HbmRNA00052
contig0007	jigsaw-2	CDS	3495	3531	31.7418	-	2	ID=Hbcds00052.7;Parent=HbmRNA00052
contig0007	jigsaw-2	CDS	3742	3819	33.6022	-	2	ID=Hbcds00052.8;Parent=HbmRNA00052
contig0007	jigsaw-2	CDS	3943	4144	34.2692	-	0	ID=Hbcds00052.9;Parent=HbmRNA00052
contig0007	jigsaw-2	CDS	4207	4226	27.8	-	2	ID=Hbcds00052.10;Parent=HbmRNA00052
contig0007	jigsaw-2	CDS	4480	4695	33.6448	-	2	ID=Hbcds00052.11;Parent=HbmRNA00052
contig0007	jigsaw-2	CDS	4799	4889	34.463	-	0	ID=Hbcds00052.12;Parent=HbmRNA00052
contig0007	jigsaw-2	CDS	5176	5212	32.106	-	1	ID=Hbcds00052.13;Parent=HbmRNA00052
contig0007	jigsaw-2	CDS	5340	5396	33.1043	-	1	ID=Hbcds00052.14;Parent=HbmRNA00052
contig0007	jigsaw-2	CDS	5571	5740	34.1457	-	0	ID=Hbcds00052.15;Parent=HbmRNA00052
contig0007	jigsaw-2	CDS	6016	6021	17.5	-	0	ID=Hbcds00052.16;Parent=HbmRNA00052
contig0007	jigsaw-2	gene	6059	6999	.	-	.	ID=Hbgene00053;Name=Hbgene00053
contig0007	jigsaw-2	mRNA	6059	6999	.	-	.	ID=HbmRNA00053;Parent=Hbgene00053
contig0007	jigsaw-2	CDS	6059	6080	32.1093	-	1	ID=Hbcds00053.1;Parent=HbmRNA00053
contig0007	jigsaw-2	CDS	6115	6134	32.0917	-	0	ID=Hbcds00053.2;Parent=HbmRNA00053
contig0007	jigsaw-2	CDS	6289	6417	34.1323	-	0	ID=Hbcds00053.3;Parent=HbmRNA00053
contig0007	jigsaw-2	CDS	6522	6622	33.737	-	2	ID=Hbcds00053.4;Parent=HbmRNA00053
contig0007	jigsaw-2	CDS	6753	6758	29.1667	-	2	ID=Hbcds00053.5;Parent=HbmRNA00053
contig0007	jigsaw-2	CDS	6927	6999	33.6977	-	0	ID=Hbcds00053.6;Parent=HbmRNA00053
contig0007	jigsaw-2	gene	7048	8149	.	-	.	ID=Hbgene00054;Name=Hbgene00054
contig0007	jigsaw-2	mRNA	7048	8149	.	-	.	ID=HbmRNA00054;Parent=Hbgene00054
contig0007	jigsaw-2	CDS	7048	7306	8.59819	-	1	ID=Hbcds00054.1;Parent=HbmRNA00054
contig0007	jigsaw-2	CDS	7465	7588	33.3354	-	2	ID=Hbcds00054.2;Parent=HbmRNA00054
contig0007	jigsaw-2	CDS	7810	8149	0.303432	-	0	ID=Hbcds00054.3;Parent=HbmRNA00054
contig0007	jigsaw-2	gene	8261	8906	.	+	.	ID=Hbgene00055;Name=Hbgene00055
contig0007	jigsaw-2	mRNA	8261	8906	.	+	.	ID=HbmRNA00055;Parent=Hbgene00055
contig0007	jigsaw-2	CDS	8261	8305	-8.62278	+	0	ID=Hbcds00055.1;Parent=HbmRNA00055
contig0007	jigsaw-2	CDS	8432	8441	-40.3077	+	0	ID=Hbcds00055.2;Parent=HbmRNA00055
contig0007	jigsaw-2	CDS	8538	8562	-33.8214	+	2	ID=Hbcds00055.3;Parent=HbmRNA00055
contig0007	jigsaw-2	CDS	8577	8598	-33.5	+	1	ID=Hbcds00055.4;Parent=HbmRNA00055
contig0007	jigsaw-2	CDS	8684	8710	-32.4516	+	0	ID=Hbcds00055.5;Parent=HbmRNA00055
contig0007	jigsaw-2	CDS	8775	8906	11.786	+	0	ID=Hbcds00055.6;Parent=HbmRNA00055
contig0008	jigsaw-2	gene	270	814	.	+	.	ID=Hbgene00056;Name=Hbgene00056
contig0008	jigsaw-2	mRNA	270	814	.	+	.	ID=HbmRNA00056;Parent=Hbgene00056
contig0008	jigsaw-2	CDS	270	426	-0.141758	+	0	ID=Hbcds00056.1;Parent=HbmRNA00056
contig0008	jigsaw-2	CDS	519	555	9.45681	+	2	ID=Hbcds00056.2;Parent=HbmRNA00056
contig0008	jigsaw-2	CDS	578	606	9.56714	+	1	ID=Hbcds00056.3;Parent=HbmRNA00056
contig0008	jigsaw-2	CDS	780	814	26.2273	+	2	ID=Hbcds00056.4;Parent=HbmRNA00056
contig0008	jigsaw-2	gene	925	2098	.	+	.	ID=Hbgene00057;Name=Hbgene00057
contig0008	jigsaw-2	mRNA	925	2098	.	+	.	ID=HbmRNA00057;Parent=Hbgene00057
contig0008	jigsaw-2	CDS	925	999	-5.82911	+	0	ID=Hbcds00057.1;Parent=HbmRNA00057
contig0008	jigsaw-2	CDS	1036	1085	15.371	+	0	ID=Hbcds00057.2;Parent=HbmRNA00057
contig0008	jigsaw-2	CDS	1168	1181	-47.256	+	1	ID=Hbcds00057.3;Parent=HbmRNA00057
contig0008	jigsaw-2	CDS	1245	1310	6.67618	+	2	ID=Hbcds00057.4;Parent=HbmRNA00057
contig0008	jigsaw-2	CDS	1558	1701	2.40532	+	2	ID=Hbcds00057.5;Parent=HbmRNA00057
contig0008	jigsaw-2	CDS	1801	1840	-33.1978	+	2	ID=Hbcds00057.6;Parent=HbmRNA00057
contig0008	jigsaw-2	CDS	1883	1897	5.28299	+	1	ID=Hbcds00057.7;Parent=HbmRNA00057
contig0008	jigsaw-2	CDS	1943	1957	14.4841	+	1	ID=Hbcds00057.8;Parent=HbmRNA00057
contig0008	jigsaw-2	CDS	2002	2098	20.662	+	1	ID=Hbcds00057.9;Parent=HbmRNA00057
contig0008	jigsaw-2	gene	2425	2547	.	+	.	ID=Hbgene00058;Name=Hbgene00058
contig0008	jigsaw-2	mRNA	2425	2547	.	+	.	ID=HbmRNA00058;Parent=Hbgene00058
contig0008	jigsaw-2	CDS	2425	2547	13.6608	+	0	ID=Hbcds00058.1;Parent=HbmRNA00058
contig0008	jigsaw-2	gene	2925	4536	.	+	.	ID=Hbgene00059;Name=Hbgene00059
contig0008	jigsaw-2	mRNA	2925	4536	.	+	.	ID=HbmRNA00059;Parent=Hbgene00059
contig0008	jigsaw-2	CDS	2925	2971	18	+	0	ID=Hbcds00059.1;Parent=HbmRNA00059
contig0008	jigsaw-2	CDS	3092	3157	8.27437	+	1	ID=Hbcds00059.2;Parent=HbmRNA00059
contig0008	jigsaw-2	CDS	3224	3246	20.1818	+	1	ID=Hbcds00059.3;Parent=HbmRNA00059
contig0008	jigsaw-2	CDS	3569	3626	11.2344	+	2	ID=Hbcds00059.4;Parent=HbmRNA00059
contig0008	jigsaw-2	CDS	4099	4223	16.6624	+	1	ID=Hbcds00059.5;Parent=HbmRNA00059
contig0008	jigsaw-2	CDS	4284	4372	-7.08231	+	2	ID=Hbcds00059.6;Parent=HbmRNA00059
contig0008	jigsaw-2	CDS	4531	4536	17.5	+	0	ID=Hbcds00059.7;Parent=HbmRNA00059
contig0008	jigsaw-2	gene	4599	5343	.	+	.	ID=Hbgene00060;Name=Hbgene00060
contig0008	jigsaw-2	mRNA	4599	5343	.	+	.	ID=HbmRNA00060;Parent=Hbgene00060
contig0008	jigsaw-2	CDS	4599	4814	6.98228	+	0	ID=Hbcds00060.1;Parent=HbmRNA00060
contig0008	jigsaw-2	CDS	4955	4956	-43.7888	+	0	ID=Hbcds00060.2;Parent=HbmRNA00060
contig0008	jigsaw-2	CDS	4974	5077	-30.6215	+	1	ID=Hbcds00060.3;Parent=HbmRNA00060
contig0008	jigsaw-2	CDS	5101	5162	-3.00805	+	2	ID=Hbcds00060.4;Parent=HbmRNA00060
contig0008	jigsaw-2	CDS	5302	5343	21.1532	+	0	ID=Hbcds00060.5;Parent=HbmRNA00060
contig0008	jigsaw-2	gene	5927	6516	.	-	.	ID=Hbgene00061;Name=Hbgene00061
contig0008	jigsaw-2	mRNA	5927	6516	.	-	.	ID=HbmRNA00061;Parent=Hbgene00061
contig0008	jigsaw-2	CDS	5927	6018	32.4499	-	2	ID=Hbcds00061.1;Parent=HbmRNA00061
contig0008	jigsaw-2	CDS	6456	6516	32.3422	-	0	ID=Hbcds00061.2;Parent=HbmRNA00061
contig0008	jigsaw-2	gene	6551	6878	.	-	.	ID=Hbgene00062;Name=Hbgene00062
contig0008	jigsaw-2	mRNA	6551	6878	.	-	.	ID=HbmRNA00062;Parent=Hbgene00062
contig0008	jigsaw-2	CDS	6551	6570	32.6718	-	2	ID=Hbcds00062.1;Parent=HbmRNA00062
contig0008	jigsaw-2	CDS	6800	6878	31.2985	-	0	ID=Hbcds00062.2;Parent=HbmRNA00062
contig0009	jigsaw-2	gene	12598	14197	.	+	.	ID=Hbgene00070;Name=Hbgene00070
contig0009	jigsaw-2	mRNA	12598	14197	.	+	.	ID=HbmRNA00070;Parent=Hbgene00070
contig0009	jigsaw-2	CDS	12598	12631	20.6889	+	0	ID=Hbcds00070.1;Parent=HbmRNA00070
contig0009	jigsaw-2	CDS	12760	12781	-39.4538	+	2	ID=Hbcds00070.2;Parent=HbmRNA00070
contig0009	jigsaw-2	CDS	13642	13761	9.32031	+	1	ID=Hbcds00070.3;Parent=HbmRNA00070
contig0009	jigsaw-2	CDS	14110	14145	4.24936	+	1	ID=Hbcds00070.4;Parent=HbmRNA00070
contig0009	jigsaw-2	CDS	14164	14197	5.66129	+	1	ID=Hbcds00070.5;Parent=HbmRNA00070
contig0009	jigsaw-2	gene	14451	14561	.	+	.	ID=Hbgene00071;Name=Hbgene00071
contig0009	jigsaw-2	mRNA	14451	14561	.	+	.	ID=HbmRNA00071;Parent=Hbgene00071
contig0009	jigsaw-2	CDS	14451	14561	28.8765	+	0	ID=Hbcds00071.1;Parent=HbmRNA00071
contig0009	jigsaw-2	gene	14718	15320	.	-	.	ID=Hbgene00072;Name=Hbgene00072
contig0009	jigsaw-2	mRNA	14718	15320	.	-	.	ID=HbmRNA00072;Parent=Hbgene00072
contig0009	jigsaw-2	CDS	14718	14723	0	-	0	ID=Hbcds00072.1;Parent=HbmRNA00072
contig0009	jigsaw-2	CDS	15039	15111	33.6627	-	1	ID=Hbcds00072.2;Parent=HbmRNA00072
contig0009	jigsaw-2	CDS	15238	15320	31.2777	-	0	ID=Hbcds00072.3;Parent=HbmRNA00072
contig0009	jigsaw-2	gene	16361	16890	.	-	.	ID=Hbgene00073;Name=Hbgene00073
contig0009	jigsaw-2	mRNA	16361	16890	.	-	.	ID=HbmRNA00073;Parent=Hbgene00073
contig0009	jigsaw-2	CDS	16361	16408	30.8138	-	0	ID=Hbcds00073.1;Parent=HbmRNA00073
contig0009	jigsaw-2	CDS	16732	16890	33.9792	-	0	ID=Hbcds00073.2;Parent=HbmRNA00073
contig0009	jigsaw-2	gene	18057	23113	.	-	.	ID=Hbgene00074;Name=Hbgene00074
contig0009	jigsaw-2	mRNA	18057	23113	.	-	.	ID=HbmRNA00074;Parent=Hbgene00074
contig0009	jigsaw-2	CDS	18057	18122	26.5	-	0	ID=Hbcds00074.1;Parent=HbmRNA00074
contig0009	jigsaw-2	CDS	18353	18370	26.25	-	0	ID=Hbcds00074.2;Parent=HbmRNA00074
contig0009	jigsaw-2	CDS	18510	18565	32.4583	-	2	ID=Hbcds00074.3;Parent=HbmRNA00074
contig0009	jigsaw-2	CDS	18617	18617	0	-	0	ID=Hbcds00074.4;Parent=HbmRNA00074
contig0009	jigsaw-2	CDS	18968	18994	17.5571	-	0	ID=Hbcds00074.5;Parent=HbmRNA00074
contig0009	jigsaw-2	CDS	20266	20271	0	-	0	ID=Hbcds00074.6;Parent=HbmRNA00074
contig0009	jigsaw-2	CDS	20460	20551	32.7428	-	2	ID=Hbcds00074.7;Parent=HbmRNA00074
contig0009	jigsaw-2	CDS	22060	22196	33.0215	-	1	ID=Hbcds00074.8;Parent=HbmRNA00074
contig0009	jigsaw-2	CDS	22368	22380	23.3333	-	2	ID=Hbcds00074.9;Parent=HbmRNA00074
contig0009	jigsaw-2	CDS	22568	22820	33.8965	-	0	ID=Hbcds00074.10;Parent=HbmRNA00074
contig0009	jigsaw-2	CDS	23054	23113	17.5	-	0	ID=Hbcds00074.11;Parent=HbmRNA00074
contig0009	jigsaw-2	gene	340	722	.	-	.	ID=Hbgene00063;Name=Hbgene00063
contig0009	jigsaw-2	mRNA	340	722	.	-	.	ID=HbmRNA00063;Parent=Hbgene00063
contig0009	jigsaw-2	CDS	340	400	0	-	1	ID=Hbcds00063.1;Parent=HbmRNA00063
contig0009	jigsaw-2	CDS	676	722	25	-	0	ID=Hbcds00063.2;Parent=HbmRNA00063
contig0009	jigsaw-2	gene	903	2605	.	+	.	ID=Hbgene00064;Name=Hbgene00064
contig0009	jigsaw-2	mRNA	903	2605	.	+	.	ID=HbmRNA00064;Parent=Hbgene00064
contig0009	jigsaw-2	CDS	903	941	-21.5714	+	0	ID=Hbcds00064.1;Parent=HbmRNA00064
contig0009	jigsaw-2	CDS	1003	1131	-31.5671	+	0	ID=Hbcds00064.2;Parent=HbmRNA00064
contig0009	jigsaw-2	CDS	1354	1482	-31.2587	+	0	ID=Hbcds00064.3;Parent=HbmRNA00064
contig0009	jigsaw-2	CDS	1584	1601	-28.094	+	0	ID=Hbcds00064.4;Parent=HbmRNA00064
contig0009	jigsaw-2	CDS	2032	2051	31.1111	+	0	ID=Hbcds00064.5;Parent=HbmRNA00064
contig0009	jigsaw-2	CDS	2494	2605	10.2214	+	1	ID=Hbcds00064.6;Parent=HbmRNA00064
contig0009	jigsaw-2	gene	2694	3018	.	-	.	ID=Hbgene00065;Name=Hbgene00065
contig0009	jigsaw-2	mRNA	2694	3018	.	-	.	ID=HbmRNA00065;Parent=Hbgene00065
contig0009	jigsaw-2	CDS	2694	2786	-5.20952	-	0	ID=Hbcds00065.1;Parent=HbmRNA00065
contig0009	jigsaw-2	CDS	2843	2933	-29.9002	-	1	ID=Hbcds00065.2;Parent=HbmRNA00065
contig0009	jigsaw-2	CDS	3008	3018	-31	-	0	ID=Hbcds00065.3;Parent=HbmRNA00065
contig0009	jigsaw-2	gene	3281	3681	.	-	.	ID=Hbgene00066;Name=Hbgene00066
contig0009	jigsaw-2	mRNA	3281	3681	.	-	.	ID=HbmRNA00066;Parent=Hbgene00066
contig0009	jigsaw-2	CDS	3281	3309	32.1676	-	2	ID=Hbcds00066.1;Parent=HbmRNA00066
contig0009	jigsaw-2	CDS	3642	3681	-20.0833	-	0	ID=Hbcds00066.2;Parent=HbmRNA00066
contig0009	jigsaw-2	gene	4037	4848	.	-	.	ID=Hbgene00067;Name=Hbgene00067
contig0009	jigsaw-2	mRNA	4037	4848	.	-	.	ID=HbmRNA00067;Parent=Hbgene00067
contig0009	jigsaw-2	CDS	4037	4330	18.1145	-	0	ID=Hbcds00067.1;Parent=HbmRNA00067
contig0009	jigsaw-2	CDS	4379	4493	-31.4476	-	1	ID=Hbcds00067.2;Parent=HbmRNA00067
contig0009	jigsaw-2	CDS	4549	4675	-31.309	-	2	ID=Hbcds00067.3;Parent=HbmRNA00067
contig0009	jigsaw-2	CDS	4752	4848	8.23226	-	0	ID=Hbcds00067.4;Parent=HbmRNA00067
contig0009	jigsaw-2	gene	5442	5810	.	-	.	ID=Hbgene00068;Name=Hbgene00068
contig0009	jigsaw-2	mRNA	5442	5810	.	-	.	ID=HbmRNA00068;Parent=Hbgene00068
contig0009	jigsaw-2	CDS	5442	5448	23.3837	-	1	ID=Hbcds00068.1;Parent=HbmRNA00068
contig0009	jigsaw-2	CDS	5460	5526	34.3296	-	2	ID=Hbcds00068.2;Parent=HbmRNA00068
contig0009	jigsaw-2	CDS	5807	5810	23.3985	-	0	ID=Hbcds00068.3;Parent=HbmRNA00068
contig0009	jigsaw-2	gene	6023	6436	.	-	.	ID=Hbgene00069;Name=Hbgene00069
contig0009	jigsaw-2	mRNA	6023	6436	.	-	.	ID=HbmRNA00069;Parent=Hbgene00069
contig0009	jigsaw-2	CDS	6023	6072	9.38667	-	2	ID=Hbcds00069.1;Parent=HbmRNA00069
contig0009	jigsaw-2	CDS	6215	6232	0	-	2	ID=Hbcds00069.2;Parent=HbmRNA00069
contig0009	jigsaw-2	CDS	6285	6314	31.1296	-	2	ID=Hbcds00069.3;Parent=HbmRNA00069
contig0009	jigsaw-2	CDS	6361	6436	-4.90706	-	0	ID=Hbcds00069.4;Parent=HbmRNA00069
contig0010	jigsaw-2	gene	10068	10237	.	+	.	ID=Hbgene00083;Name=Hbgene00083
contig0010	jigsaw-2	mRNA	10068	10237	.	+	.	ID=HbmRNA00083;Parent=Hbgene00083
contig0010	jigsaw-2	CDS	10068	10205	24.0729	+	0	ID=Hbcds00083.1;Parent=HbmRNA00083
contig0010	jigsaw-2	CDS	10235	10237	17.5	+	0	ID=Hbcds00083.2;Parent=HbmRNA00083
contig0010	jigsaw-2	gene	10353	11382	.	+	.	ID=Hbgene00084;Name=Hbgene00084
contig0010	jigsaw-2	mRNA	10353	11382	.	+	.	ID=HbmRNA00084;Parent=Hbgene00084
contig0010	jigsaw-2	CDS	10353	10408	7.21939	+	0	ID=Hbcds00084.1;Parent=HbmRNA00084
contig0010	jigsaw-2	CDS	10450	10523	-23.7959	+	1	ID=Hbcds00084.2;Parent=HbmRNA00084
contig0010	jigsaw-2	CDS	10544	10608	5.17552	+	2	ID=Hbcds00084.3;Parent=HbmRNA00084
contig0010	jigsaw-2	CDS	10629	10692	-5.02732	+	0	ID=Hbcds00084.4;Parent=HbmRNA00084
contig0010	jigsaw-2	CDS	10719	10723	26.25	+	2	ID=Hbcds00084.5;Parent=HbmRNA00084
contig0010	jigsaw-2	CDS	10932	10989	-5.55498	+	0	ID=Hbcds00084.6;Parent=HbmRNA00084
contig0010	jigsaw-2	CDS	11102	11127	-32.3517	+	2	ID=Hbcds00084.7;Parent=HbmRNA00084
contig0010	jigsaw-2	CDS	11204	11233	-0.344617	+	0	ID=Hbcds00084.8;Parent=HbmRNA00084
contig0010	jigsaw-2	CDS	11293	11382	11.5217	+	0	ID=Hbcds00084.9;Parent=HbmRNA00084
contig0010	jigsaw-2	gene	414	665	.	+	.	ID=Hbgene00075;Name=Hbgene00075
contig0010	jigsaw-2	mRNA	414	665	.	+	.	ID=HbmRNA00075;Parent=Hbgene00075
contig0010	jigsaw-2	CDS	414	526	1.85614	+	0	ID=Hbcds00075.1;Parent=HbmRNA00075
contig0010	jigsaw-2	CDS	641	665	-3.8251	+	1	ID=Hbcds00075.2;Parent=HbmRNA00075
contig0010	jigsaw-2	gene	768	1226	.	-	.	ID=Hbgene00076;Name=Hbgene00076
contig0010	jigsaw-2	mRNA	768	1226	.	-	.	ID=HbmRNA00076;Parent=Hbgene00076
contig0010	jigsaw-2	CDS	768	827	32.8276	-	0	ID=Hbcds00076.1;Parent=HbmRNA00076
contig0010	jigsaw-2	CDS	875	911	32.6982	-	1	ID=Hbcds00076.2;Parent=HbmRNA00076
contig0010	jigsaw-2	CDS	963	1038	31.1578	-	2	ID=Hbcds00076.3;Parent=HbmRNA00076
contig0010	jigsaw-2	CDS	1064	1226	31.9319	-	0	ID=Hbcds00076.4;Parent=HbmRNA00076
contig0010	jigsaw-2	gene	1396	2641	.	+	.	ID=Hbgene00077;Name=Hbgene00077
contig0010	jigsaw-2	mRNA	1396	2641	.	+	.	ID=HbmRNA00077;Parent=Hbgene00077
contig0010	jigsaw-2	CDS	1396	1526	-0.29581	+	0	ID=Hbcds00077.1;Parent=HbmRNA00077
contig0010	jigsaw-2	CDS	1551	1602	-36.0187	+	1	ID=Hbcds00077.2;Parent=HbmRNA00077
contig0010	jigsaw-2	CDS	1660	1696	-29.5694	+	0	ID=Hbcds00077.3;Parent=HbmRNA00077
contig0010	jigsaw-2	CDS	1913	2007	-16.1302	+	2	ID=Hbcds00077.4;Parent=HbmRNA00077
contig0010	jigsaw-2	CDS	2199	2206	-46.5	+	0	ID=Hbcds00077.5;Parent=HbmRNA00077
contig0010	jigsaw-2	CDS	2231	2302	-29.3135	+	1	ID=Hbcds00077.6;Parent=HbmRNA00077
contig0010	jigsaw-2	CDS	2314	2334	-28.1034	+	1	ID=Hbcds00077.7;Parent=HbmRNA00077
contig0010	jigsaw-2	CDS	2385	2459	4.84481	+	1	ID=Hbcds00077.8;Parent=HbmRNA00077
contig0010	jigsaw-2	CDS	2545	2641	24.2431	+	1	ID=Hbcds00077.9;Parent=HbmRNA00077
contig0010	jigsaw-2	gene	2755	3196	.	-	.	ID=Hbgene00078;Name=Hbgene00078
contig0010	jigsaw-2	mRNA	2755	3196	.	-	.	ID=HbmRNA00078;Parent=Hbgene00078
contig0010	jigsaw-2	CDS	2755	2863	29.4602	-	1	ID=Hbcds00078.1;Parent=HbmRNA00078
contig0010	jigsaw-2	CDS	2906	3003	32.7471	-	0	ID=Hbcds00078.2;Parent=HbmRNA00078
contig0010	jigsaw-2	CDS	3128	3196	32.0751	-	0	ID=Hbcds00078.3;Parent=HbmRNA00078
contig0010	jigsaw-2	gene	3496	5982	.	+	.	ID=Hbgene00079;Name=Hbgene00079
contig0010	jigsaw-2	mRNA	3496	5982	.	+	.	ID=HbmRNA00079;Parent=Hbgene00079
contig0010	jigsaw-2	CDS	3496	3512	8.625	+	0	ID=Hbcds00079.1;Parent=HbmRNA00079
contig0010	jigsaw-2	CDS	3699	4016	-5.17056	+	1	ID=Hbcds00079.2;Parent=HbmRNA00079
contig0010	jigsaw-2	CDS	4281	4298	-34.1891	+	1	ID=Hbcds00079.3;Parent=HbmRNA00079
contig0010	jigsaw-2	CDS	4346	4363	-30.6374	+	1	ID=Hbcds00079.4;Parent=HbmRNA00079
contig0010	jigsaw-2	CDS	4535	4559	8.64841	+	1	ID=Hbcds00079.5;Parent=HbmRNA00079
contig0010	jigsaw-2	CDS	4787	4819	20.8566	+	0	ID=Hbcds00079.6;Parent=HbmRNA00079
contig0010	jigsaw-2	CDS	4961	5005	23.3748	+	0	ID=Hbcds00079.7;Parent=HbmRNA00079
contig0010	jigsaw-2	CDS	5031	5073	17.8793	+	0	ID=Hbcds00079.8;Parent=HbmRNA00079
contig0010	jigsaw-2	CDS	5199	5212	-31.6211	+	2	ID=Hbcds00079.9;Parent=HbmRNA00079
contig0010	jigsaw-2	CDS	5411	5580	17.5599	+	0	ID=Hbcds00079.10;Parent=HbmRNA00079
contig0010	jigsaw-2	CDS	5593	5619	31.5	+	1	ID=Hbcds00079.11;Parent=HbmRNA00079
contig0010	jigsaw-2	CDS	5850	5868	28.2	+	1	ID=Hbcds00079.12;Parent=HbmRNA00079
contig0010	jigsaw-2	CDS	5914	5982	26.3882	+	0	ID=Hbcds00079.13;Parent=HbmRNA00079
contig0010	jigsaw-2	gene	6057	8800	.	+	.	ID=Hbgene00080;Name=Hbgene00080
contig0010	jigsaw-2	mRNA	6057	8800	.	+	.	ID=HbmRNA00080;Parent=Hbgene00080
contig0010	jigsaw-2	CDS	6057	6191	23.4481	+	0	ID=Hbcds00080.1;Parent=HbmRNA00080
contig0010	jigsaw-2	CDS	6268	6293	15.6275	+	0	ID=Hbcds00080.2;Parent=HbmRNA00080
contig0010	jigsaw-2	CDS	6351	6393	-20.7382	+	1	ID=Hbcds00080.3;Parent=HbmRNA00080
contig0010	jigsaw-2	CDS	6481	6511	-9.39868	+	0	ID=Hbcds00080.4;Parent=HbmRNA00080
contig0010	jigsaw-2	CDS	6594	6612	-28.7628	+	2	ID=Hbcds00080.5;Parent=HbmRNA00080
contig0010	jigsaw-2	CDS	6782	6782	-23.6565	+	1	ID=Hbcds00080.6;Parent=HbmRNA00080
contig0010	jigsaw-2	CDS	6999	7017	20.153	+	0	ID=Hbcds00080.7;Parent=HbmRNA00080
contig0010	jigsaw-2	CDS	7028	7038	-25.8686	+	2	ID=Hbcds00080.8;Parent=HbmRNA00080
contig0010	jigsaw-2	CDS	7074	7124	-17.5047	+	0	ID=Hbcds00080.9;Parent=HbmRNA00080
contig0010	jigsaw-2	CDS	7235	7253	-16.5113	+	0	ID=Hbcds00080.10;Parent=HbmRNA00080
contig0010	jigsaw-2	CDS	7512	7550	19.7173	+	2	ID=Hbcds00080.11;Parent=HbmRNA00080
contig0010	jigsaw-2	CDS	7695	7785	9.13869	+	2	ID=Hbcds00080.12;Parent=HbmRNA00080
contig0010	jigsaw-2	CDS	7964	8006	26.8647	+	1	ID=Hbcds00080.13;Parent=HbmRNA00080
contig0010	jigsaw-2	CDS	8305	8361	-5.61175	+	0	ID=Hbcds00080.14;Parent=HbmRNA00080
contig0010	jigsaw-2	CDS	8403	8445	-34.0061	+	0	ID=Hbcds00080.15;Parent=HbmRNA00080
contig0010	jigsaw-2	CDS	8571	8800	20.4131	+	2	ID=Hbcds00080.16;Parent=HbmRNA00080
contig0010	jigsaw-2	gene	8853	9801	.	+	.	ID=Hbgene00081;Name=Hbgene00081
contig0010	jigsaw-2	mRNA	8853	9801	.	+	.	ID=HbmRNA00081;Parent=Hbgene00081
contig0010	jigsaw-2	CDS	8853	8880	-10.8296	+	0	ID=Hbcds00081.1;Parent=HbmRNA00081
contig0010	jigsaw-2	CDS	8951	9168	-18.7852	+	2	ID=Hbcds00081.2;Parent=HbmRNA00081
contig0010	jigsaw-2	CDS	9184	9224	20.1205	+	0	ID=Hbcds00081.3;Parent=HbmRNA00081
contig0010	jigsaw-2	CDS	9236	9251	23.1413	+	1	ID=Hbcds00081.4;Parent=HbmRNA00081
contig0010	jigsaw-2	CDS	9361	9456	-3.16482	+	0	ID=Hbcds00081.5;Parent=HbmRNA00081
contig0010	jigsaw-2	CDS	9476	9505	-30.5079	+	0	ID=Hbcds00081.6;Parent=HbmRNA00081
contig0010	jigsaw-2	CDS	9542	9587	6.35081	+	0	ID=Hbcds00081.7;Parent=HbmRNA00081
contig0010	jigsaw-2	CDS	9701	9801	25.5182	+	2	ID=Hbcds00081.8;Parent=HbmRNA00081
contig0010	jigsaw-2	gene	9884	10039	.	+	.	ID=Hbgene00082;Name=Hbgene00082
contig0010	jigsaw-2	mRNA	9884	10039	.	+	.	ID=HbmRNA00082;Parent=Hbgene00082
contig0010	jigsaw-2	CDS	9884	9990	30.0064	+	0	ID=Hbcds00082.1;Parent=HbmRNA00082
contig0010	jigsaw-2	CDS	10006	10039	17.6433	+	1	ID=Hbcds00082.2;Parent=HbmRNA00082
contig0011	jigsaw-2	gene	46	2448	.	+	.	ID=Hbgene00085;Name=Hbgene00085
contig0011	jigsaw-2	mRNA	46	2448	.	+	.	ID=HbmRNA00085;Parent=Hbgene00085
contig0011	jigsaw-2	CDS	46	278	9.97158	+	0	ID=Hbcds00085.1;Parent=HbmRNA00085
contig0011	jigsaw-2	CDS	735	854	0	+	1	ID=Hbcds00085.2;Parent=HbmRNA00085
contig0011	jigsaw-2	CDS	1057	1129	-7.84699	+	1	ID=Hbcds00085.3;Parent=HbmRNA00085
contig0011	jigsaw-2	CDS	1672	1769	-8	+	0	ID=Hbcds00085.4;Parent=HbmRNA00085
contig0011	jigsaw-2	CDS	2058	2257	-34.75	+	1	ID=Hbcds00085.5;Parent=HbmRNA00085
contig0011	jigsaw-2	CDS	2333	2448	1.7069	+	2	ID=Hbcds00085.6;Parent=HbmRNA00085
contig0011	jigsaw-2	gene	29951	31052	.	-	.	ID=Hbgene00094;Name=Hbgene00094
contig0011	jigsaw-2	mRNA	29951	31052	.	-	.	ID=HbmRNA00094;Parent=Hbgene00094
contig0011	jigsaw-2	CDS	29951	30056	15.3399	-	1	ID=Hbcds00094.1;Parent=HbmRNA00094
contig0011	jigsaw-2	CDS	30109	30230	-29.0089	-	0	ID=Hbcds00094.2;Parent=HbmRNA00094
contig0011	jigsaw-2	CDS	30310	30420	-31.3657	-	0	ID=Hbcds00094.3;Parent=HbmRNA00094
contig0011	jigsaw-2	CDS	30666	30858	-26.7335	-	1	ID=Hbcds00094.4;Parent=HbmRNA00094
contig0011	jigsaw-2	CDS	30970	31052	30.0119	-	0	ID=Hbcds00094.5;Parent=HbmRNA00094
contig0011	jigsaw-2	gene	31270	32595	.	-	.	ID=Hbgene00095;Name=Hbgene00095
contig0011	jigsaw-2	mRNA	31270	32595	.	-	.	ID=HbmRNA00095;Parent=Hbgene00095
contig0011	jigsaw-2	CDS	31270	31340	-4.57738	-	2	ID=Hbcds00095.1;Parent=HbmRNA00095
contig0011	jigsaw-2	CDS	31590	31777	31.0322	-	1	ID=Hbcds00095.2;Parent=HbmRNA00095
contig0011	jigsaw-2	CDS	31917	32112	22.8534	-	2	ID=Hbcds00095.3;Parent=HbmRNA00095
contig0011	jigsaw-2	CDS	32388	32464	-39.3137	-	1	ID=Hbcds00095.4;Parent=HbmRNA00095
contig0011	jigsaw-2	CDS	32558	32595	-7.34749	-	0	ID=Hbcds00095.5;Parent=HbmRNA00095
contig0011	jigsaw-2	gene	34383	34730	.	-	.	ID=Hbgene00096;Name=Hbgene00096
contig0011	jigsaw-2	mRNA	34383	34730	.	-	.	ID=HbmRNA00096;Parent=Hbgene00096
contig0011	jigsaw-2	CDS	34383	34546	27.4397	-	2	ID=Hbcds00096.1;Parent=HbmRNA00096
contig0011	jigsaw-2	CDS	34703	34730	25.5804	-	0	ID=Hbcds00096.2;Parent=HbmRNA00096
contig0011	jigsaw-2	gene	35234	38308	.	+	.	ID=Hbgene00097;Name=Hbgene00097
contig0011	jigsaw-2	mRNA	35234	38308	.	+	.	ID=HbmRNA00097;Parent=Hbgene00097
contig0011	jigsaw-2	CDS	35234	35338	-21.9977	+	0	ID=Hbcds00097.1;Parent=HbmRNA00097
contig0011	jigsaw-2	CDS	36063	36266	-18.6582	+	0	ID=Hbcds00097.2;Parent=HbmRNA00097
contig0011	jigsaw-2	CDS	38048	38308	1.12819	+	0	ID=Hbcds00097.3;Parent=HbmRNA00097
contig0011	jigsaw-2	gene	40698	42722	.	-	.	ID=Hbgene00098;Name=Hbgene00098
contig0011	jigsaw-2	mRNA	40698	42722	.	-	.	ID=HbmRNA00098;Parent=Hbgene00098
contig0011	jigsaw-2	CDS	40698	40913	29.1047	-	0	ID=Hbcds00098.1;Parent=HbmRNA00098
contig0011	jigsaw-2	CDS	40977	41096	28.6969	-	0	ID=Hbcds00098.2;Parent=HbmRNA00098
contig0011	jigsaw-2	CDS	41193	41331	25.8399	-	1	ID=Hbcds00098.3;Parent=HbmRNA00098
contig0011	jigsaw-2	CDS	41921	42183	31.9447	-	0	ID=Hbcds00098.4;Parent=HbmRNA00098
contig0011	jigsaw-2	CDS	42360	42473	30.9091	-	0	ID=Hbcds00098.5;Parent=HbmRNA00098
contig0011	jigsaw-2	CDS	42600	42722	29.5436	-	0	ID=Hbcds00098.6;Parent=HbmRNA00098
contig0011	jigsaw-2	gene	43460	45135	.	+	.	ID=Hbgene00099;Name=Hbgene00099
contig0011	jigsaw-2	mRNA	43460	45135	.	+	.	ID=HbmRNA00099;Parent=Hbgene00099
contig0011	jigsaw-2	CDS	43460	43643	0.370412	+	0	ID=Hbcds00099.1;Parent=HbmRNA00099
contig0011	jigsaw-2	CDS	43981	44019	-29.0113	+	2	ID=Hbcds00099.2;Parent=HbmRNA00099
contig0011	jigsaw-2	CDS	44681	44760	-28.75	+	2	ID=Hbcds00099.3;Parent=HbmRNA00099
contig0011	jigsaw-2	CDS	44856	45024	-32.4889	+	0	ID=Hbcds00099.4;Parent=HbmRNA00099
contig0011	jigsaw-2	CDS	45104	45135	-3.60615	+	2	ID=Hbcds00099.5;Parent=HbmRNA00099
contig0011	jigsaw-2	gene	2672	2876	.	-	.	ID=Hbgene00086;Name=Hbgene00086
contig0011	jigsaw-2	mRNA	2672	2876	.	-	.	ID=HbmRNA00086;Parent=Hbgene00086
contig0011	jigsaw-2	CDS	2672	2711	25.3722	-	1	ID=Hbcds00086.1;Parent=HbmRNA00086
contig0011	jigsaw-2	CDS	2818	2876	23.037	-	0	ID=Hbcds00086.2;Parent=HbmRNA00086
contig0011	jigsaw-2	gene	3048	3372	.	-	.	ID=Hbgene00087;Name=Hbgene00087
contig0011	jigsaw-2	mRNA	3048	3372	.	-	.	ID=HbmRNA00087;Parent=Hbgene00087
contig0011	jigsaw-2	CDS	3048	3058	0	-	2	ID=Hbcds00087.1;Parent=HbmRNA00087
contig0011	jigsaw-2	CDS	3087	3372	29.767	-	0	ID=Hbcds00087.2;Parent=HbmRNA00087
contig0011	jigsaw-2	gene	4599	9692	.	-	.	ID=Hbgene00088;Name=Hbgene00088
contig0011	jigsaw-2	mRNA	4599	9692	.	-	.	ID=HbmRNA00088;Parent=Hbgene00088
contig0011	jigsaw-2	CDS	4599	4736	27.8317	-	0	ID=Hbcds00088.1;Parent=HbmRNA00088
contig0011	jigsaw-2	CDS	4821	4940	-34.8601	-	0	ID=Hbcds00088.2;Parent=HbmRNA00088
contig0011	jigsaw-2	CDS	5543	5680	-35.398	-	0	ID=Hbcds00088.3;Parent=HbmRNA00088
contig0011	jigsaw-2	CDS	5767	6004	20.0551	-	1	ID=Hbcds00088.4;Parent=HbmRNA00088
contig0011	jigsaw-2	CDS	7267	7322	28.2202	-	0	ID=Hbcds00088.5;Parent=HbmRNA00088
contig0011	jigsaw-2	CDS	9633	9692	17.0652	-	0	ID=Hbcds00088.6;Parent=HbmRNA00088
contig0011	jigsaw-2	gene	10486	12010	.	-	.	ID=Hbgene00089;Name=Hbgene00089
contig0011	jigsaw-2	mRNA	10486	12010	.	-	.	ID=HbmRNA00089;Parent=Hbgene00089
contig0011	jigsaw-2	CDS	10486	10643	30.8182	-	2	ID=Hbcds00089.1;Parent=HbmRNA00089
contig0011	jigsaw-2	CDS	10804	10984	29.6299	-	0	ID=Hbcds00089.2;Parent=HbmRNA00089
contig0011	jigsaw-2	CDS	11894	12010	30.4918	-	0	ID=Hbcds00089.3;Parent=HbmRNA00089
contig0011	jigsaw-2	gene	13128	18103	.	-	.	ID=Hbgene00090;Name=Hbgene00090
contig0011	jigsaw-2	mRNA	13128	18103	.	-	.	ID=HbmRNA00090;Parent=Hbgene00090
contig0011	jigsaw-2	CDS	13128	13151	29.0051	-	0	ID=Hbcds00090.1;Parent=HbmRNA00090
contig0011	jigsaw-2	CDS	13777	13958	-28.2392	-	2	ID=Hbcds00090.2;Parent=HbmRNA00090
contig0011	jigsaw-2	CDS	14004	14198	-29.14	-	2	ID=Hbcds00090.3;Parent=HbmRNA00090
contig0011	jigsaw-2	CDS	14227	14239	-25	-	0	ID=Hbcds00090.4;Parent=HbmRNA00090
contig0011	jigsaw-2	CDS	14287	14340	-36.8214	-	0	ID=Hbcds00090.5;Parent=HbmRNA00090
contig0011	jigsaw-2	CDS	14389	14601	2.36413	-	0	ID=Hbcds00090.6;Parent=HbmRNA00090
contig0011	jigsaw-2	CDS	14794	14886	0	-	0	ID=Hbcds00090.7;Parent=HbmRNA00090
contig0011	jigsaw-2	CDS	14956	15047	-24.5	-	2	ID=Hbcds00090.8;Parent=HbmRNA00090
contig0011	jigsaw-2	CDS	15308	15369	-35.3885	-	1	ID=Hbcds00090.9;Parent=HbmRNA00090
contig0011	jigsaw-2	CDS	15469	15577	-33.1421	-	2	ID=Hbcds00090.10;Parent=HbmRNA00090
contig0011	jigsaw-2	CDS	15641	15742	-35.3365	-	2	ID=Hbcds00090.11;Parent=HbmRNA00090
contig0011	jigsaw-2	CDS	15830	15967	-28.8958	-	2	ID=Hbcds00090.12;Parent=HbmRNA00090
contig0011	jigsaw-2	CDS	16025	16181	-5.22317	-	0	ID=Hbcds00090.13;Parent=HbmRNA00090
contig0011	jigsaw-2	CDS	16355	16491	-26.4911	-	2	ID=Hbcds00090.14;Parent=HbmRNA00090
contig0011	jigsaw-2	CDS	16663	16786	-34.9385	-	0	ID=Hbcds00090.15;Parent=HbmRNA00090
contig0011	jigsaw-2	CDS	16871	17003	-37.0487	-	1	ID=Hbcds00090.16;Parent=HbmRNA00090
contig0011	jigsaw-2	CDS	17358	17443	25.9488	-	0	ID=Hbcds00090.17;Parent=HbmRNA00090
contig0011	jigsaw-2	CDS	17659	17775	-34.2476	-	0	ID=Hbcds00090.18;Parent=HbmRNA00090
contig0011	jigsaw-2	CDS	17984	18103	9.45	-	0	ID=Hbcds00090.19;Parent=HbmRNA00090
contig0011	jigsaw-2	gene	18852	21332	.	-	.	ID=Hbgene00091;Name=Hbgene00091
contig0011	jigsaw-2	mRNA	18852	21332	.	-	.	ID=HbmRNA00091;Parent=Hbgene00091
contig0011	jigsaw-2	CDS	18852	19051	9.83739	-	2	ID=Hbcds00091.1;Parent=HbmRNA00091
contig0011	jigsaw-2	CDS	19212	19400	5.03074	-	2	ID=Hbcds00091.2;Parent=HbmRNA00091
contig0011	jigsaw-2	CDS	19479	19586	-26.6033	-	2	ID=Hbcds00091.3;Parent=HbmRNA00091
contig0011	jigsaw-2	CDS	19656	19727	-27.6033	-	2	ID=Hbcds00091.4;Parent=HbmRNA00091
contig0011	jigsaw-2	CDS	19839	19950	-35.7689	-	0	ID=Hbcds00091.5;Parent=HbmRNA00091
contig0011	jigsaw-2	CDS	19993	20017	16.8297	-	1	ID=Hbcds00091.6;Parent=HbmRNA00091
contig0011	jigsaw-2	CDS	20551	20562	-27.16	-	1	ID=Hbcds00091.7;Parent=HbmRNA00091
contig0011	jigsaw-2	CDS	20782	20809	-33.25	-	2	ID=Hbcds00091.8;Parent=HbmRNA00091
contig0011	jigsaw-2	CDS	20905	21027	-43.56	-	2	ID=Hbcds00091.9;Parent=HbmRNA00091
contig0011	jigsaw-2	CDS	21146	21332	-10.2357	-	0	ID=Hbcds00091.10;Parent=HbmRNA00091
contig0011	jigsaw-2	gene	21363	23152	.	-	.	ID=Hbgene00092;Name=Hbgene00092
contig0011	jigsaw-2	mRNA	21363	23152	.	-	.	ID=HbmRNA00092;Parent=Hbgene00092
contig0011	jigsaw-2	CDS	21363	21514	-7.3699	-	2	ID=Hbcds00092.1;Parent=HbmRNA00092
contig0011	jigsaw-2	CDS	21576	21722	-28	-	2	ID=Hbcds00092.2;Parent=HbmRNA00092
contig0011	jigsaw-2	CDS	21952	22151	-32.4873	-	1	ID=Hbcds00092.3;Parent=HbmRNA00092
contig0011	jigsaw-2	CDS	22386	22524	-28.8395	-	2	ID=Hbcds00092.4;Parent=HbmRNA00092
contig0011	jigsaw-2	CDS	22772	22924	3.45111	-	2	ID=Hbcds00092.5;Parent=HbmRNA00092
contig0011	jigsaw-2	CDS	22966	23152	-3.49574	-	0	ID=Hbcds00092.6;Parent=HbmRNA00092
contig0011	jigsaw-2	gene	23231	29297	.	-	.	ID=Hbgene00093;Name=Hbgene00093
contig0011	jigsaw-2	mRNA	23231	29297	.	-	.	ID=HbmRNA00093;Parent=Hbgene00093
contig0011	jigsaw-2	CDS	23231	23314	22.6745	-	0	ID=Hbcds00093.1;Parent=HbmRNA00093
contig0011	jigsaw-2	CDS	23407	23499	27.2802	-	0	ID=Hbcds00093.2;Parent=HbmRNA00093
contig0011	jigsaw-2	CDS	23612	23727	26.9956	-	2	ID=Hbcds00093.3;Parent=HbmRNA00093
contig0011	jigsaw-2	CDS	23812	23946	-32.4025	-	2	ID=Hbcds00093.4;Parent=HbmRNA00093
contig0011	jigsaw-2	CDS	24101	24253	-34.4104	-	2	ID=Hbcds00093.5;Parent=HbmRNA00093
contig0011	jigsaw-2	CDS	24361	24539	13.8522	-	1	ID=Hbcds00093.6;Parent=HbmRNA00093
contig0011	jigsaw-2	CDS	24756	24764	-22.4846	-	1	ID=Hbcds00093.7;Parent=HbmRNA00093
contig0011	jigsaw-2	CDS	25261	25298	-31.1487	-	0	ID=Hbcds00093.8;Parent=HbmRNA00093
contig0011	jigsaw-2	CDS	25394	25501	-30.9628	-	0	ID=Hbcds00093.9;Parent=HbmRNA00093
contig0011	jigsaw-2	CDS	25618	25706	-25.5975	-	2	ID=Hbcds00093.10;Parent=HbmRNA00093
contig0011	jigsaw-2	CDS	25870	25902	26.245	-	2	ID=Hbcds00093.11;Parent=HbmRNA00093
contig0011	jigsaw-2	CDS	26120	26292	-3.97188	-	1	ID=Hbcds00093.12;Parent=HbmRNA00093
contig0011	jigsaw-2	CDS	26562	26686	-9.6741	-	0	ID=Hbcds00093.13;Parent=HbmRNA00093
contig0011	jigsaw-2	CDS	26772	27019	-18.9452	-	2	ID=Hbcds00093.14;Parent=HbmRNA00093
contig0011	jigsaw-2	CDS	27056	27222	-26.4542	-	1	ID=Hbcds00093.15;Parent=HbmRNA00093
contig0011	jigsaw-2	CDS	27306	27334	17.5536	-	0	ID=Hbcds00093.16;Parent=HbmRNA00093
contig0011	jigsaw-2	CDS	27362	27687	-17.1318	-	2	ID=Hbcds00093.17;Parent=HbmRNA00093
contig0011	jigsaw-2	CDS	27743	28073	4.15945	-	0	ID=Hbcds00093.18;Parent=HbmRNA00093
contig0011	jigsaw-2	CDS	28154	28317	-13.0114	-	2	ID=Hbcds00093.19;Parent=HbmRNA00093
contig0011	jigsaw-2	CDS	28443	28611	25.3228	-	0	ID=Hbcds00093.20;Parent=HbmRNA00093
contig0011	jigsaw-2	CDS	28825	28889	16.5577	-	2	ID=Hbcds00093.21;Parent=HbmRNA00093
contig0011	jigsaw-2	CDS	29162	29297	22.697	-	0	ID=Hbcds00093.22;Parent=HbmRNA00093
contig0012	jigsaw-2	gene	3	436	.	+	.	ID=Hbgene00100;Name=Hbgene00100
contig0012	jigsaw-2	mRNA	3	436	.	+	.	ID=HbmRNA00100;Parent=Hbgene00100
contig0012	jigsaw-2	CDS	3	58	34.283	+	0	ID=Hbcds00100.1;Parent=HbmRNA00100
contig0012	jigsaw-2	CDS	73	160	34.5747	+	1	ID=Hbcds00100.2;Parent=HbmRNA00100
contig0012	jigsaw-2	CDS	183	274	1.55572	+	0	ID=Hbcds00100.3;Parent=HbmRNA00100
contig0012	jigsaw-2	CDS	304	359	-31.72	+	1	ID=Hbcds00100.4;Parent=HbmRNA00100
contig0012	jigsaw-2	CDS	432	436	-4.8	+	2	ID=Hbcds00100.5;Parent=HbmRNA00100
contig0012	jigsaw-2	gene	455	1383	.	+	.	ID=Hbgene00101;Name=Hbgene00101
contig0012	jigsaw-2	mRNA	455	1383	.	+	.	ID=HbmRNA00101;Parent=Hbgene00101
contig0012	jigsaw-2	CDS	455	484	0.660345	+	0	ID=Hbcds00101.1;Parent=HbmRNA00101
contig0012	jigsaw-2	CDS	497	517	-30.65	+	0	ID=Hbcds00101.2;Parent=HbmRNA00101
contig0012	jigsaw-2	CDS	534	582	-29.9396	+	0	ID=Hbcds00101.3;Parent=HbmRNA00101
contig0012	jigsaw-2	CDS	596	700	-31.0024	+	2	ID=Hbcds00101.4;Parent=HbmRNA00101
contig0012	jigsaw-2	CDS	711	773	-28.1825	+	2	ID=Hbcds00101.5;Parent=HbmRNA00101
contig0012	jigsaw-2	CDS	818	835	-33.9412	+	2	ID=Hbcds00101.6;Parent=HbmRNA00101
contig0012	jigsaw-2	CDS	856	857	-33.5	+	2	ID=Hbcds00101.7;Parent=HbmRNA00101
contig0012	jigsaw-2	CDS	880	881	-33.5	+	0	ID=Hbcds00101.8;Parent=HbmRNA00101
contig0012	jigsaw-2	CDS	921	922	-33.5	+	1	ID=Hbcds00101.9;Parent=HbmRNA00101
contig0012	jigsaw-2	CDS	991	994	-37.2843	+	2	ID=Hbcds00101.10;Parent=HbmRNA00101
contig0012	jigsaw-2	CDS	1012	1076	-27.9879	+	1	ID=Hbcds00101.11;Parent=HbmRNA00101
contig0012	jigsaw-2	CDS	1088	1089	-33.5	+	2	ID=Hbcds00101.12;Parent=HbmRNA00101
contig0012	jigsaw-2	CDS	1150	1151	-46.9583	+	0	ID=Hbcds00101.13;Parent=HbmRNA00101
contig0012	jigsaw-2	CDS	1194	1212	-31	+	1	ID=Hbcds00101.14;Parent=HbmRNA00101
contig0012	jigsaw-2	CDS	1231	1383	-13.2454	+	0	ID=Hbcds00101.15;Parent=HbmRNA00101
contig0013	jigsaw-2	gene	611	1640	.	+	.	ID=Hbgene00102;Name=Hbgene00102
contig0013	jigsaw-2	mRNA	611	1640	.	+	.	ID=HbmRNA00102;Parent=Hbgene00102
contig0013	jigsaw-2	CDS	611	729	12.8276	+	0	ID=Hbcds00102.1;Parent=HbmRNA00102
contig0013	jigsaw-2	CDS	1456	1582	2.8	+	1	ID=Hbcds00102.2;Parent=HbmRNA00102
contig0013	jigsaw-2	CDS	1620	1640	0	+	0	ID=Hbcds00102.3;Parent=HbmRNA00102
contig0013	jigsaw-2	gene	16800	18956	.	+	.	ID=Hbgene00111;Name=Hbgene00111
contig0013	jigsaw-2	mRNA	16800	18956	.	+	.	ID=HbmRNA00111;Parent=Hbgene00111
contig0013	jigsaw-2	CDS	16800	16913	-10.9975	+	0	ID=Hbcds00111.1;Parent=HbmRNA00111
contig0013	jigsaw-2	CDS	17273	17378	-41.1366	+	0	ID=Hbcds00111.2;Parent=HbmRNA00111
contig0013	jigsaw-2	CDS	17456	17514	-41.9603	+	2	ID=Hbcds00111.3;Parent=HbmRNA00111
contig0013	jigsaw-2	CDS	17632	17650	-35.4429	+	0	ID=Hbcds00111.4;Parent=HbmRNA00111
contig0013	jigsaw-2	CDS	18898	18956	6.31565	+	2	ID=Hbcds00111.5;Parent=HbmRNA00111
contig0013	jigsaw-2	gene	24464	25243	.	-	.	ID=Hbgene00112;Name=Hbgene00112
contig0013	jigsaw-2	mRNA	24464	25243	.	-	.	ID=HbmRNA00112;Parent=Hbgene00112
contig0013	jigsaw-2	CDS	24464	24511	33.746	-	0	ID=Hbcds00112.1;Parent=HbmRNA00112
contig0013	jigsaw-2	CDS	25208	25243	25.7905	-	0	ID=Hbcds00112.2;Parent=HbmRNA00112
contig0013	jigsaw-2	gene	26762	31656	.	-	.	ID=Hbgene00113;Name=Hbgene00113
contig0013	jigsaw-2	mRNA	26762	31656	.	-	.	ID=HbmRNA00113;Parent=Hbgene00113
contig0013	jigsaw-2	CDS	26762	26818	22.6923	-	0	ID=Hbcds00113.1;Parent=HbmRNA00113
contig0013	jigsaw-2	CDS	27321	27518	-31.825	-	0	ID=Hbcds00113.2;Parent=HbmRNA00113
contig0013	jigsaw-2	CDS	27639	27779	9.11738	-	0	ID=Hbcds00113.3;Parent=HbmRNA00113
contig0013	jigsaw-2	CDS	28746	28760	17	-	0	ID=Hbcds00113.4;Parent=HbmRNA00113
contig0013	jigsaw-2	CDS	31654	31656	0	-	0	ID=Hbcds00113.5;Parent=HbmRNA00113
contig0013	jigsaw-2	gene	31739	32902	.	-	.	ID=Hbgene00114;Name=Hbgene00114
contig0013	jigsaw-2	mRNA	31739	32902	.	-	.	ID=HbmRNA00114;Parent=Hbgene00114
contig0013	jigsaw-2	CDS	31739	31857	30.0811	-	2	ID=Hbcds00114.1;Parent=HbmRNA00114
contig0013	jigsaw-2	CDS	32081	32174	-41.0283	-	0	ID=Hbcds00114.2;Parent=HbmRNA00114
contig0013	jigsaw-2	CDS	32210	32244	30.9417	-	2	ID=Hbcds00114.3;Parent=HbmRNA00114
contig0013	jigsaw-2	CDS	32659	32780	-34.2393	-	1	ID=Hbcds00114.4;Parent=HbmRNA00114
contig0013	jigsaw-2	CDS	32838	32902	-30.3457	-	0	ID=Hbcds00114.5;Parent=HbmRNA00114
contig0013	jigsaw-2	gene	34159	35850	.	-	.	ID=Hbgene00115;Name=Hbgene00115
contig0013	jigsaw-2	mRNA	34159	35850	.	-	.	ID=HbmRNA00115;Parent=Hbgene00115
contig0013	jigsaw-2	CDS	34159	34170	-17.0408	-	0	ID=Hbcds00115.1;Parent=HbmRNA00115
contig0013	jigsaw-2	CDS	34357	34373	16.5758	-	2	ID=Hbcds00115.2;Parent=HbmRNA00115
contig0013	jigsaw-2	CDS	34512	34571	17.5	-	2	ID=Hbcds00115.3;Parent=HbmRNA00115
contig0013	jigsaw-2	CDS	35301	35421	-33.8895	-	0	ID=Hbcds00115.4;Parent=HbmRNA00115
contig0013	jigsaw-2	CDS	35689	35850	1.66667	-	0	ID=Hbcds00115.5;Parent=HbmRNA00115
contig0013	jigsaw-2	gene	35921	36715	.	-	.	ID=Hbgene00116;Name=Hbgene00116
contig0013	jigsaw-2	mRNA	35921	36715	.	-	.	ID=HbmRNA00116;Parent=Hbgene00116
contig0013	jigsaw-2	CDS	35921	36133	16.5146	-	0	ID=Hbcds00116.1;Parent=HbmRNA00116
contig0013	jigsaw-2	CDS	36340	36419	-32.983	-	2	ID=Hbcds00116.2;Parent=HbmRNA00116
contig0013	jigsaw-2	CDS	36616	36715	-8	-	0	ID=Hbcds00116.3;Parent=HbmRNA00116
contig0013	jigsaw-2	gene	37255	40009	.	+	.	ID=Hbgene00117;Name=Hbgene00117
contig0013	jigsaw-2	mRNA	37255	40009	.	+	.	ID=HbmRNA00117;Parent=Hbgene00117
contig0013	jigsaw-2	CDS	37255	37293	-14.5	+	0	ID=Hbcds00117.1;Parent=HbmRNA00117
contig0013	jigsaw-2	CDS	38650	38880	-38.1161	+	0	ID=Hbcds00117.2;Parent=HbmRNA00117
contig0013	jigsaw-2	CDS	39063	39122	-25.4824	+	0	ID=Hbcds00117.3;Parent=HbmRNA00117
contig0013	jigsaw-2	CDS	39474	39500	-25.9977	+	0	ID=Hbcds00117.4;Parent=HbmRNA00117
contig0013	jigsaw-2	CDS	39643	39713	-31.4954	+	0	ID=Hbcds00117.5;Parent=HbmRNA00117
contig0013	jigsaw-2	CDS	39847	40009	10.3158	+	1	ID=Hbcds00117.6;Parent=HbmRNA00117
contig0013	jigsaw-2	gene	40301	42173	.	+	.	ID=Hbgene00118;Name=Hbgene00118
contig0013	jigsaw-2	mRNA	40301	42173	.	+	.	ID=HbmRNA00118;Parent=Hbgene00118
contig0013	jigsaw-2	CDS	40301	40437	-10.1426	+	0	ID=Hbcds00118.1;Parent=HbmRNA00118
contig0013	jigsaw-2	CDS	40799	40861	-38.303	+	1	ID=Hbcds00118.2;Parent=HbmRNA00118
contig0013	jigsaw-2	CDS	40923	41014	-42.9394	+	1	ID=Hbcds00118.3;Parent=HbmRNA00118
contig0013	jigsaw-2	CDS	41103	41271	-28	+	2	ID=Hbcds00118.4;Parent=HbmRNA00118
contig0013	jigsaw-2	CDS	41350	41481	-28	+	1	ID=Hbcds00118.5;Parent=HbmRNA00118
contig0013	jigsaw-2	CDS	41622	41625	-29.6401	+	1	ID=Hbcds00118.6;Parent=HbmRNA00118
contig0013	jigsaw-2	CDS	42129	42173	0.894154	+	0	ID=Hbcds00118.7;Parent=HbmRNA00118
contig0013	jigsaw-2	gene	3087	3170	.	+	.	ID=Hbgene00103;Name=Hbgene00103
contig0013	jigsaw-2	mRNA	3087	3170	.	+	.	ID=HbmRNA00103;Parent=Hbgene00103
contig0013	jigsaw-2	CDS	3087	3170	16.5	+	0	ID=Hbcds00103.1;Parent=HbmRNA00103
contig0013	jigsaw-2	gene	42884	45305	.	+	.	ID=Hbgene00119;Name=Hbgene00119
contig0013	jigsaw-2	mRNA	42884	45305	.	+	.	ID=HbmRNA00119;Parent=Hbgene00119
contig0013	jigsaw-2	CDS	42884	43042	-5.20968	+	0	ID=Hbcds00119.1;Parent=HbmRNA00119
contig0013	jigsaw-2	CDS	44880	45029	-8.13774	+	0	ID=Hbcds00119.2;Parent=HbmRNA00119
contig0013	jigsaw-2	CDS	45273	45305	5.5	+	0	ID=Hbcds00119.3;Parent=HbmRNA00119
contig0013	jigsaw-2	gene	45441	48603	.	+	.	ID=Hbgene00120;Name=Hbgene00120
contig0013	jigsaw-2	mRNA	45441	48603	.	+	.	ID=HbmRNA00120;Parent=Hbgene00120
contig0013	jigsaw-2	CDS	45441	45464	-21.4228	+	0	ID=Hbcds00120.1;Parent=HbmRNA00120
contig0013	jigsaw-2	CDS	46080	46106	-31.1395	+	0	ID=Hbcds00120.2;Parent=HbmRNA00120
contig0013	jigsaw-2	CDS	47264	47309	-50.4903	+	0	ID=Hbcds00120.3;Parent=HbmRNA00120
contig0013	jigsaw-2	CDS	47471	47560	-30.7858	+	2	ID=Hbcds00120.4;Parent=HbmRNA00120
contig0013	jigsaw-2	CDS	48298	48323	-34.8645	+	2	ID=Hbcds00120.5;Parent=HbmRNA00120
contig0013	jigsaw-2	CDS	48415	48603	-8.52658	+	0	ID=Hbcds00120.6;Parent=HbmRNA00120
contig0013	jigsaw-2	gene	49145	49717	.	-	.	ID=Hbgene00121;Name=Hbgene00121
contig0013	jigsaw-2	mRNA	49145	49717	.	-	.	ID=HbmRNA00121;Parent=Hbgene00121
contig0013	jigsaw-2	CDS	49145	49245	-28.05	-	2	ID=Hbcds00121.1;Parent=HbmRNA00121
contig0013	jigsaw-2	CDS	49505	49612	-43.5	-	2	ID=Hbcds00121.2;Parent=HbmRNA00121
contig0013	jigsaw-2	CDS	49675	49717	-31	-	0	ID=Hbcds00121.3;Parent=HbmRNA00121
contig0013	jigsaw-2	gene	50753	53256	.	-	.	ID=Hbgene00122;Name=Hbgene00122
contig0013	jigsaw-2	mRNA	50753	53256	.	-	.	ID=HbmRNA00122;Parent=Hbgene00122
contig0013	jigsaw-2	CDS	50753	50765	0	-	1	ID=Hbcds00122.1;Parent=HbmRNA00122
contig0013	jigsaw-2	CDS	50796	51089	-0.606454	-	1	ID=Hbcds00122.2;Parent=HbmRNA00122
contig0013	jigsaw-2	CDS	51157	51272	-31.0711	-	0	ID=Hbcds00122.3;Parent=HbmRNA00122
contig0013	jigsaw-2	CDS	51339	51517	-40.196	-	2	ID=Hbcds00122.4;Parent=HbmRNA00122
contig0013	jigsaw-2	CDS	51537	51686	3.23998	-	2	ID=Hbcds00122.5;Parent=HbmRNA00122
contig0013	jigsaw-2	CDS	52032	52175	3.59635	-	2	ID=Hbcds00122.6;Parent=HbmRNA00122
contig0013	jigsaw-2	CDS	52231	52318	-31.7527	-	0	ID=Hbcds00122.7;Parent=HbmRNA00122
contig0013	jigsaw-2	CDS	52395	52468	28.946	-	2	ID=Hbcds00122.8;Parent=HbmRNA00122
contig0013	jigsaw-2	CDS	52500	52698	-3.26684	-	0	ID=Hbcds00122.9;Parent=HbmRNA00122
contig0013	jigsaw-2	CDS	52773	52850	15.8302	-	0	ID=Hbcds00122.10;Parent=HbmRNA00122
contig0013	jigsaw-2	CDS	52938	53088	-30.4918	-	1	ID=Hbcds00122.11;Parent=HbmRNA00122
contig0013	jigsaw-2	CDS	53183	53256	-4.6382	-	0	ID=Hbcds00122.12;Parent=HbmRNA00122
contig0013	jigsaw-2	gene	54725	55176	.	-	.	ID=Hbgene00123;Name=Hbgene00123
contig0013	jigsaw-2	mRNA	54725	55176	.	-	.	ID=HbmRNA00123;Parent=Hbgene00123
contig0013	jigsaw-2	CDS	54725	54913	7.33015	-	0	ID=Hbcds00123.1;Parent=HbmRNA00123
contig0013	jigsaw-2	CDS	54973	55176	25.8028	-	0	ID=Hbcds00123.2;Parent=HbmRNA00123
contig0013	jigsaw-2	gene	55442	57079	.	-	.	ID=Hbgene00124;Name=Hbgene00124
contig0013	jigsaw-2	mRNA	55442	57079	.	-	.	ID=HbmRNA00124;Parent=Hbgene00124
contig0013	jigsaw-2	CDS	55442	55609	10.9759	-	0	ID=Hbcds00124.1;Parent=HbmRNA00124
contig0013	jigsaw-2	CDS	55669	55749	27.2671	-	0	ID=Hbcds00124.2;Parent=HbmRNA00124
contig0013	jigsaw-2	CDS	55794	55952	-27.8644	-	0	ID=Hbcds00124.3;Parent=HbmRNA00124
contig0013	jigsaw-2	CDS	56025	56272	-14.0203	-	2	ID=Hbcds00124.4;Parent=HbmRNA00124
contig0013	jigsaw-2	CDS	56848	56923	-40.8571	-	0	ID=Hbcds00124.5;Parent=HbmRNA00124
contig0013	jigsaw-2	CDS	56980	57024	0	-	0	ID=Hbcds00124.6;Parent=HbmRNA00124
contig0013	jigsaw-2	CDS	57074	57079	-30.0054	-	0	ID=Hbcds00124.7;Parent=HbmRNA00124
contig0013	jigsaw-2	gene	57858	63218	.	+	.	ID=Hbgene00125;Name=Hbgene00125
contig0013	jigsaw-2	mRNA	57858	63218	.	+	.	ID=HbmRNA00125;Parent=Hbgene00125
contig0013	jigsaw-2	CDS	57858	57860	0	+	0	ID=Hbcds00125.1;Parent=HbmRNA00125
contig0013	jigsaw-2	CDS	58034	58060	0.838832	+	0	ID=Hbcds00125.2;Parent=HbmRNA00125
contig0013	jigsaw-2	CDS	58376	58453	-33.5	+	0	ID=Hbcds00125.3;Parent=HbmRNA00125
contig0013	jigsaw-2	CDS	58793	58797	-27.3055	+	0	ID=Hbcds00125.4;Parent=HbmRNA00125
contig0013	jigsaw-2	CDS	58972	59017	-20.9304	+	1	ID=Hbcds00125.5;Parent=HbmRNA00125
contig0013	jigsaw-2	CDS	60843	60845	-24	+	0	ID=Hbcds00125.6;Parent=HbmRNA00125
contig0013	jigsaw-2	CDS	60972	61023	-48.5	+	0	ID=Hbcds00125.7;Parent=HbmRNA00125
contig0013	jigsaw-2	CDS	61172	61191	-28.0315	+	2	ID=Hbcds00125.8;Parent=HbmRNA00125
contig0013	jigsaw-2	CDS	61582	61617	-35.8593	+	0	ID=Hbcds00125.9;Parent=HbmRNA00125
contig0013	jigsaw-2	CDS	62937	62963	-30.4367	+	0	ID=Hbcds00125.10;Parent=HbmRNA00125
contig0013	jigsaw-2	CDS	63006	63147	-51.435	+	0	ID=Hbcds00125.11;Parent=HbmRNA00125
contig0013	jigsaw-2	CDS	63208	63218	-0.404762	+	2	ID=Hbcds00125.12;Parent=HbmRNA00125
contig0013	jigsaw-2	gene	66867	72200	.	+	.	ID=Hbgene00126;Name=Hbgene00126
contig0013	jigsaw-2	mRNA	66867	72200	.	+	.	ID=HbmRNA00126;Parent=Hbgene00126
contig0013	jigsaw-2	CDS	66867	66948	15.3167	+	0	ID=Hbcds00126.1;Parent=HbmRNA00126
contig0013	jigsaw-2	CDS	67511	67584	-28.975	+	2	ID=Hbcds00126.2;Parent=HbmRNA00126
contig0013	jigsaw-2	CDS	68523	68665	-37.1458	+	0	ID=Hbcds00126.3;Parent=HbmRNA00126
contig0013	jigsaw-2	CDS	68800	68943	-28.6303	+	1	ID=Hbcds00126.4;Parent=HbmRNA00126
contig0013	jigsaw-2	CDS	69049	69063	-28.7607	+	1	ID=Hbcds00126.5;Parent=HbmRNA00126
contig0013	jigsaw-2	CDS	69466	69610	-47.386	+	1	ID=Hbcds00126.6;Parent=HbmRNA00126
contig0013	jigsaw-2	CDS	70275	70431	2.74324	+	0	ID=Hbcds00126.7;Parent=HbmRNA00126
contig0013	jigsaw-2	CDS	70891	70923	-48.5854	+	2	ID=Hbcds00126.8;Parent=HbmRNA00126
contig0013	jigsaw-2	CDS	70943	70987	-18.8128	+	2	ID=Hbcds00126.9;Parent=HbmRNA00126
contig0013	jigsaw-2	CDS	71187	71295	-36.3482	+	2	ID=Hbcds00126.10;Parent=HbmRNA00126
contig0013	jigsaw-2	CDS	72173	72200	0	+	1	ID=Hbcds00126.11;Parent=HbmRNA00126
contig0013	jigsaw-2	gene	3928	4107	.	-	.	ID=Hbgene00104;Name=Hbgene00104
contig0013	jigsaw-2	mRNA	3928	4107	.	-	.	ID=HbmRNA00104;Parent=Hbgene00104
contig0013	jigsaw-2	CDS	3928	4107	-2.63656	-	0	ID=Hbcds00104.1;Parent=HbmRNA00104
contig0013	jigsaw-2	gene	73088	77948	.	-	.	ID=Hbgene00127;Name=Hbgene00127
contig0013	jigsaw-2	mRNA	73088	77948	.	-	.	ID=HbmRNA00127;Parent=Hbgene00127
contig0013	jigsaw-2	CDS	73088	73288	16.4787	-	0	ID=Hbcds00127.1;Parent=HbmRNA00127
contig0013	jigsaw-2	CDS	73492	73651	-34	-	1	ID=Hbcds00127.2;Parent=HbmRNA00127
contig0013	jigsaw-2	CDS	74240	74361	-29.4153	-	0	ID=Hbcds00127.3;Parent=HbmRNA00127
contig0013	jigsaw-2	CDS	74623	74680	27.6027	-	1	ID=Hbcds00127.4;Parent=HbmRNA00127
contig0013	jigsaw-2	CDS	74734	74991	30.2472	-	1	ID=Hbcds00127.5;Parent=HbmRNA00127
contig0013	jigsaw-2	CDS	75810	75906	17	-	2	ID=Hbcds00127.6;Parent=HbmRNA00127
contig0013	jigsaw-2	CDS	75946	76069	-6.00063	-	0	ID=Hbcds00127.7;Parent=HbmRNA00127
contig0013	jigsaw-2	CDS	76178	76238	0	-	1	ID=Hbcds00127.8;Parent=HbmRNA00127
contig0013	jigsaw-2	CDS	76359	76545	27.6767	-	2	ID=Hbcds00127.9;Parent=HbmRNA00127
contig0013	jigsaw-2	CDS	76891	76970	0	-	1	ID=Hbcds00127.10;Parent=HbmRNA00127
contig0013	jigsaw-2	CDS	77461	77506	23.3333	-	2	ID=Hbcds00127.11;Parent=HbmRNA00127
contig0013	jigsaw-2	CDS	77777	77906	-26	-	0	ID=Hbcds00127.12;Parent=HbmRNA00127
contig0013	jigsaw-2	CDS	77943	77948	0	-	0	ID=Hbcds00127.13;Parent=HbmRNA00127
contig0013	jigsaw-2	gene	78218	79101	.	+	.	ID=Hbgene00128;Name=Hbgene00128
contig0013	jigsaw-2	mRNA	78218	79101	.	+	.	ID=HbmRNA00128;Parent=Hbgene00128
contig0013	jigsaw-2	CDS	78218	78261	31.2038	+	0	ID=Hbcds00128.1;Parent=HbmRNA00128
contig0013	jigsaw-2	CDS	79071	79101	-5.81026	+	1	ID=Hbcds00128.2;Parent=HbmRNA00128
contig0013	jigsaw-2	gene	79710	81196	.	-	.	ID=Hbgene00129;Name=Hbgene00129
contig0013	jigsaw-2	mRNA	79710	81196	.	-	.	ID=HbmRNA00129;Parent=Hbgene00129
contig0013	jigsaw-2	CDS	79710	79784	22.6667	-	0	ID=Hbcds00129.1;Parent=HbmRNA00129
contig0013	jigsaw-2	CDS	81110	81196	28.8034	-	0	ID=Hbcds00129.2;Parent=HbmRNA00129
contig0013	jigsaw-2	gene	81986	83292	.	+	.	ID=Hbgene00130;Name=Hbgene00130
contig0013	jigsaw-2	mRNA	81986	83292	.	+	.	ID=HbmRNA00130;Parent=Hbgene00130
contig0013	jigsaw-2	CDS	81986	82075	0	+	0	ID=Hbcds00130.1;Parent=HbmRNA00130
contig0013	jigsaw-2	CDS	82118	82187	-28.5	+	0	ID=Hbcds00130.2;Parent=HbmRNA00130
contig0013	jigsaw-2	CDS	82235	82567	-32.9261	+	2	ID=Hbcds00130.3;Parent=HbmRNA00130
contig0013	jigsaw-2	CDS	83069	83292	-2.09583	+	2	ID=Hbcds00130.4;Parent=HbmRNA00130
contig0013	jigsaw-2	gene	84355	85207	.	-	.	ID=Hbgene00131;Name=Hbgene00131
contig0013	jigsaw-2	mRNA	84355	85207	.	-	.	ID=HbmRNA00131;Parent=Hbgene00131
contig0013	jigsaw-2	CDS	84355	84404	17.5	-	2	ID=Hbcds00131.1;Parent=HbmRNA00131
contig0013	jigsaw-2	CDS	84431	84659	-33.3743	-	0	ID=Hbcds00131.2;Parent=HbmRNA00131
contig0013	jigsaw-2	CDS	84730	84780	28.2675	-	0	ID=Hbcds00131.3;Parent=HbmRNA00131
contig0013	jigsaw-2	CDS	85037	85207	-4.44315	-	0	ID=Hbcds00131.4;Parent=HbmRNA00131
contig0013	jigsaw-2	gene	85390	85788	.	-	.	ID=Hbgene00132;Name=Hbgene00132
contig0013	jigsaw-2	mRNA	85390	85788	.	-	.	ID=HbmRNA00132;Parent=Hbgene00132
contig0013	jigsaw-2	CDS	85390	85456	16.6221	-	1	ID=Hbcds00132.1;Parent=HbmRNA00132
contig0013	jigsaw-2	CDS	85517	85566	22.4961	-	0	ID=Hbcds00132.2;Parent=HbmRNA00132
contig0013	jigsaw-2	CDS	85609	85788	31.4858	-	0	ID=Hbcds00132.3;Parent=HbmRNA00132
contig0013	jigsaw-2	gene	4318	4681	.	-	.	ID=Hbgene00105;Name=Hbgene00105
contig0013	jigsaw-2	mRNA	4318	4681	.	-	.	ID=HbmRNA00105;Parent=Hbgene00105
contig0013	jigsaw-2	CDS	4318	4499	2.8125	-	2	ID=Hbcds00105.1;Parent=HbmRNA00105
contig0013	jigsaw-2	CDS	4606	4681	26.8283	-	0	ID=Hbcds00105.2;Parent=HbmRNA00105
contig0013	jigsaw-2	gene	6135	6794	.	+	.	ID=Hbgene00106;Name=Hbgene00106
contig0013	jigsaw-2	mRNA	6135	6794	.	+	.	ID=HbmRNA00106;Parent=Hbgene00106
contig0013	jigsaw-2	CDS	6135	6161	12.7	+	0	ID=Hbcds00106.1;Parent=HbmRNA00106
contig0013	jigsaw-2	CDS	6432	6794	11.1993	+	0	ID=Hbcds00106.2;Parent=HbmRNA00106
contig0013	jigsaw-2	gene	9715	10354	.	+	.	ID=Hbgene00107;Name=Hbgene00107
contig0013	jigsaw-2	mRNA	9715	10354	.	+	.	ID=HbmRNA00107;Parent=Hbgene00107
contig0013	jigsaw-2	CDS	9715	9862	-9.15444	+	0	ID=Hbcds00107.1;Parent=HbmRNA00107
contig0013	jigsaw-2	CDS	9969	10135	-33.1949	+	2	ID=Hbcds00107.2;Parent=HbmRNA00107
contig0013	jigsaw-2	CDS	10178	10242	-37.6277	+	0	ID=Hbcds00107.3;Parent=HbmRNA00107
contig0013	jigsaw-2	CDS	10288	10354	-10.4335	+	1	ID=Hbcds00107.4;Parent=HbmRNA00107
contig0013	jigsaw-2	gene	10400	12913	.	-	.	ID=Hbgene00108;Name=Hbgene00108
contig0013	jigsaw-2	mRNA	10400	12913	.	-	.	ID=HbmRNA00108;Parent=Hbgene00108
contig0013	jigsaw-2	CDS	10400	10617	30.483	-	2	ID=Hbcds00108.1;Parent=HbmRNA00108
contig0013	jigsaw-2	CDS	10759	10925	29.9743	-	1	ID=Hbcds00108.2;Parent=HbmRNA00108
contig0013	jigsaw-2	CDS	12414	12604	-30.1989	-	0	ID=Hbcds00108.3;Parent=HbmRNA00108
contig0013	jigsaw-2	CDS	12896	12913	0	-	0	ID=Hbcds00108.4;Parent=HbmRNA00108
contig0013	jigsaw-2	gene	14626	15364	.	-	.	ID=Hbgene00109;Name=Hbgene00109
contig0013	jigsaw-2	mRNA	14626	15364	.	-	.	ID=HbmRNA00109;Parent=Hbgene00109
contig0013	jigsaw-2	CDS	14626	14722	11.2642	-	1	ID=Hbcds00109.1;Parent=HbmRNA00109
contig0013	jigsaw-2	CDS	14777	14848	-26.3906	-	1	ID=Hbcds00109.2;Parent=HbmRNA00109
contig0013	jigsaw-2	CDS	15106	15193	-35.1974	-	2	ID=Hbcds00109.3;Parent=HbmRNA00109
contig0013	jigsaw-2	CDS	15229	15364	11.5488	-	0	ID=Hbcds00109.4;Parent=HbmRNA00109
contig0013	jigsaw-2	gene	15471	16201	.	-	.	ID=Hbgene00110;Name=Hbgene00110
contig0013	jigsaw-2	mRNA	15471	16201	.	-	.	ID=HbmRNA00110;Parent=Hbgene00110
contig0013	jigsaw-2	CDS	15471	15548	-11.2063	-	0	ID=Hbcds00110.1;Parent=HbmRNA00110
contig0013	jigsaw-2	CDS	15827	15952	-41.5833	-	0	ID=Hbcds00110.2;Parent=HbmRNA00110
contig0013	jigsaw-2	CDS	16109	16201	-11.2024	-	0	ID=Hbcds00110.3;Parent=HbmRNA00110
contig0014	jigsaw-2	gene	4102	4221	.	+	.	ID=Hbgene00140;Name=Hbgene00140
contig0014	jigsaw-2	mRNA	4102	4221	.	+	.	ID=HbmRNA00140;Parent=Hbgene00140
contig0014	jigsaw-2	CDS	4102	4221	31.5536	+	0	ID=Hbcds00140.1;Parent=HbmRNA00140
contig0014	jigsaw-2	gene	4266	4882	.	+	.	ID=Hbgene00141;Name=Hbgene00141
contig0014	jigsaw-2	mRNA	4266	4882	.	+	.	ID=HbmRNA00141;Parent=Hbgene00141
contig0014	jigsaw-2	CDS	4266	4268	-32.875	+	0	ID=Hbcds00141.1;Parent=HbmRNA00141
contig0014	jigsaw-2	CDS	4312	4345	-32.9446	+	0	ID=Hbcds00141.2;Parent=HbmRNA00141
contig0014	jigsaw-2	CDS	4359	4417	-27.7671	+	2	ID=Hbcds00141.3;Parent=HbmRNA00141
contig0014	jigsaw-2	CDS	4435	4435	0	+	0	ID=Hbcds00141.4;Parent=HbmRNA00141
contig0014	jigsaw-2	CDS	4474	4499	-35.4104	+	2	ID=Hbcds00141.5;Parent=HbmRNA00141
contig0014	jigsaw-2	CDS	4551	4738	-10.352	+	0	ID=Hbcds00141.6;Parent=HbmRNA00141
contig0014	jigsaw-2	CDS	4843	4882	30.5536	+	1	ID=Hbcds00141.7;Parent=HbmRNA00141
contig0014	jigsaw-2	gene	4903	5527	.	+	.	ID=Hbgene00142;Name=Hbgene00142
contig0014	jigsaw-2	mRNA	4903	5527	.	+	.	ID=HbmRNA00142;Parent=Hbgene00142
contig0014	jigsaw-2	CDS	4903	5078	31.0947	+	0	ID=Hbcds00142.1;Parent=HbmRNA00142
contig0014	jigsaw-2	CDS	5090	5129	17.8652	+	1	ID=Hbcds00142.2;Parent=HbmRNA00142
contig0014	jigsaw-2	CDS	5141	5224	-13.5405	+	0	ID=Hbcds00142.3;Parent=HbmRNA00142
contig0014	jigsaw-2	CDS	5242	5251	8.33333	+	0	ID=Hbcds00142.4;Parent=HbmRNA00142
contig0014	jigsaw-2	CDS	5281	5423	23.1484	+	2	ID=Hbcds00142.5;Parent=HbmRNA00142
contig0014	jigsaw-2	CDS	5435	5527	30.6926	+	0	ID=Hbcds00142.6;Parent=HbmRNA00142
contig0014	jigsaw-2	gene	5550	5804	.	+	.	ID=Hbgene00143;Name=Hbgene00143
contig0014	jigsaw-2	mRNA	5550	5804	.	+	.	ID=HbmRNA00143;Parent=Hbgene00143
contig0014	jigsaw-2	CDS	5550	5716	31.1196	+	0	ID=Hbcds00143.1;Parent=HbmRNA00143
contig0014	jigsaw-2	CDS	5752	5804	-0.59279	+	1	ID=Hbcds00143.2;Parent=HbmRNA00143
contig0014	jigsaw-2	gene	455	939	.	+	.	ID=Hbgene00133;Name=Hbgene00133
contig0014	jigsaw-2	mRNA	455	939	.	+	.	ID=HbmRNA00133;Parent=Hbgene00133
contig0014	jigsaw-2	CDS	455	485	3.98601	+	0	ID=Hbcds00133.1;Parent=HbmRNA00133
contig0014	jigsaw-2	CDS	547	627	30.2865	+	2	ID=Hbcds00133.2;Parent=HbmRNA00133
contig0014	jigsaw-2	CDS	642	646	-34.6811	+	2	ID=Hbcds00133.3;Parent=HbmRNA00133
contig0014	jigsaw-2	CDS	801	860	34.3693	+	0	ID=Hbcds00133.4;Parent=HbmRNA00133
contig0014	jigsaw-2	CDS	877	939	30.9306	+	0	ID=Hbcds00133.5;Parent=HbmRNA00133
contig0014	jigsaw-2	gene	984	1091	.	+	.	ID=Hbgene00134;Name=Hbgene00134
contig0014	jigsaw-2	mRNA	984	1091	.	+	.	ID=HbmRNA00134;Parent=Hbgene00134
contig0014	jigsaw-2	CDS	984	1091	26.0581	+	0	ID=Hbcds00134.1;Parent=HbmRNA00134
contig0014	jigsaw-2	gene	1119	1534	.	+	.	ID=Hbgene00135;Name=Hbgene00135
contig0014	jigsaw-2	mRNA	1119	1534	.	+	.	ID=HbmRNA00135;Parent=Hbgene00135
contig0014	jigsaw-2	CDS	1119	1161	15.3705	+	0	ID=Hbcds00135.1;Parent=HbmRNA00135
contig0014	jigsaw-2	CDS	1204	1283	26.1389	+	2	ID=Hbcds00135.2;Parent=HbmRNA00135
contig0014	jigsaw-2	CDS	1333	1420	24.4239	+	0	ID=Hbcds00135.3;Parent=HbmRNA00135
contig0014	jigsaw-2	CDS	1446	1534	29.3106	+	2	ID=Hbcds00135.4;Parent=HbmRNA00135
contig0014	jigsaw-2	gene	1560	1843	.	+	.	ID=Hbgene00136;Name=Hbgene00136
contig0014	jigsaw-2	mRNA	1560	1843	.	+	.	ID=HbmRNA00136;Parent=Hbgene00136
contig0014	jigsaw-2	CDS	1560	1562	-29.9474	+	0	ID=Hbcds00136.1;Parent=HbmRNA00136
contig0014	jigsaw-2	CDS	1659	1714	13.1323	+	0	ID=Hbcds00136.2;Parent=HbmRNA00136
contig0014	jigsaw-2	CDS	1735	1843	33.3885	+	1	ID=Hbcds00136.3;Parent=HbmRNA00136
contig0014	jigsaw-2	gene	1891	2288	.	+	.	ID=Hbgene00137;Name=Hbgene00137
contig0014	jigsaw-2	mRNA	1891	2288	.	+	.	ID=HbmRNA00137;Parent=Hbgene00137
contig0014	jigsaw-2	CDS	1891	1935	19.8107	+	0	ID=Hbcds00137.1;Parent=HbmRNA00137
contig0014	jigsaw-2	CDS	1990	2054	8.53957	+	0	ID=Hbcds00137.2;Parent=HbmRNA00137
contig0014	jigsaw-2	CDS	2186	2288	27.7442	+	1	ID=Hbcds00137.3;Parent=HbmRNA00137
contig0014	jigsaw-2	gene	2419	2882	.	+	.	ID=Hbgene00138;Name=Hbgene00138
contig0014	jigsaw-2	mRNA	2419	2882	.	+	.	ID=HbmRNA00138;Parent=Hbgene00138
contig0014	jigsaw-2	CDS	2419	2459	31.3531	+	0	ID=Hbcds00138.1;Parent=HbmRNA00138
contig0014	jigsaw-2	CDS	2567	2631	29.4758	+	1	ID=Hbcds00138.2;Parent=HbmRNA00138
contig0014	jigsaw-2	CDS	2737	2766	3.79762	+	2	ID=Hbcds00138.3;Parent=HbmRNA00138
contig0014	jigsaw-2	CDS	2806	2882	31.8232	+	2	ID=Hbcds00138.4;Parent=HbmRNA00138
contig0014	jigsaw-2	gene	3980	4039	.	+	.	ID=Hbgene00139;Name=Hbgene00139
contig0014	jigsaw-2	mRNA	3980	4039	.	+	.	ID=HbmRNA00139;Parent=Hbgene00139
contig0014	jigsaw-2	CDS	3980	4039	2.33996	+	0	ID=Hbcds00139.1;Parent=HbmRNA00139
contig0017	jigsaw-2	gene	287	409	.	+	.	ID=Hbgene00144;Name=Hbgene00144
contig0017	jigsaw-2	mRNA	287	409	.	+	.	ID=HbmRNA00144;Parent=Hbgene00144
contig0017	jigsaw-2	CDS	287	409	13.9249	+	0	ID=Hbcds00144.1;Parent=HbmRNA00144
contig0017	jigsaw-2	gene	465	1375	.	+	.	ID=Hbgene00145;Name=Hbgene00145
contig0017	jigsaw-2	mRNA	465	1375	.	+	.	ID=HbmRNA00145;Parent=Hbgene00145
contig0017	jigsaw-2	CDS	465	491	-29.4286	+	0	ID=Hbcds00145.1;Parent=HbmRNA00145
contig0017	jigsaw-2	CDS	620	740	-30.3348	+	0	ID=Hbcds00145.2;Parent=HbmRNA00145
contig0017	jigsaw-2	CDS	762	763	-25.8462	+	2	ID=Hbcds00145.3;Parent=HbmRNA00145
contig0017	jigsaw-2	CDS	939	973	-31.1224	+	0	ID=Hbcds00145.4;Parent=HbmRNA00145
contig0017	jigsaw-2	CDS	1011	1014	-43.9811	+	1	ID=Hbcds00145.5;Parent=HbmRNA00145
contig0017	jigsaw-2	CDS	1090	1142	-29.3575	+	0	ID=Hbcds00145.6;Parent=HbmRNA00145
contig0017	jigsaw-2	CDS	1255	1375	1.90981	+	1	ID=Hbcds00145.7;Parent=HbmRNA00145
contig0017	jigsaw-2	gene	1407	3752	.	+	.	ID=Hbgene00146;Name=Hbgene00146
contig0017	jigsaw-2	mRNA	1407	3752	.	+	.	ID=HbmRNA00146;Parent=Hbgene00146
contig0017	jigsaw-2	CDS	1407	1512	-4.81988	+	0	ID=Hbcds00146.1;Parent=HbmRNA00146
contig0017	jigsaw-2	CDS	1548	1565	-28.3333	+	2	ID=Hbcds00146.2;Parent=HbmRNA00146
contig0017	jigsaw-2	CDS	1590	1630	-31.1111	+	2	ID=Hbcds00146.3;Parent=HbmRNA00146
contig0017	jigsaw-2	CDS	1666	1740	-33.5071	+	0	ID=Hbcds00146.4;Parent=HbmRNA00146
contig0017	jigsaw-2	CDS	1946	1957	0	+	0	ID=Hbcds00146.5;Parent=HbmRNA00146
contig0017	jigsaw-2	CDS	2029	2063	-28.1839	+	0	ID=Hbcds00146.6;Parent=HbmRNA00146
contig0017	jigsaw-2	CDS	2224	2232	-34.75	+	1	ID=Hbcds00146.7;Parent=HbmRNA00146
contig0017	jigsaw-2	CDS	2363	2396	-24.3217	+	1	ID=Hbcds00146.8;Parent=HbmRNA00146
contig0017	jigsaw-2	CDS	2469	2499	-18.7639	+	0	ID=Hbcds00146.9;Parent=HbmRNA00146
contig0017	jigsaw-2	CDS	2549	2556	-37.2043	+	2	ID=Hbcds00146.10;Parent=HbmRNA00146
contig0017	jigsaw-2	CDS	2571	2650	-24.9814	+	0	ID=Hbcds00146.11;Parent=HbmRNA00146
contig0017	jigsaw-2	CDS	2728	2731	-29.5	+	1	ID=Hbcds00146.12;Parent=HbmRNA00146
contig0017	jigsaw-2	CDS	2754	2774	-32.2111	+	0	ID=Hbcds00146.13;Parent=HbmRNA00146
contig0017	jigsaw-2	CDS	2809	2909	-31.1375	+	0	ID=Hbcds00146.14;Parent=HbmRNA00146
contig0017	jigsaw-2	CDS	3041	3041	-25.9412	+	1	ID=Hbcds00146.15;Parent=HbmRNA00146
contig0017	jigsaw-2	CDS	3180	3219	-39.3214	+	0	ID=Hbcds00146.16;Parent=HbmRNA00146
contig0017	jigsaw-2	CDS	3263	3269	-25.8214	+	2	ID=Hbcds00146.17;Parent=HbmRNA00146
contig0017	jigsaw-2	CDS	3379	3505	-29.3381	+	1	ID=Hbcds00146.18;Parent=HbmRNA00146
contig0017	jigsaw-2	CDS	3548	3562	-28.6	+	0	ID=Hbcds00146.19;Parent=HbmRNA00146
contig0017	jigsaw-2	CDS	3608	3655	-33.6283	+	0	ID=Hbcds00146.20;Parent=HbmRNA00146
contig0017	jigsaw-2	CDS	3687	3752	18.3653	+	0	ID=Hbcds00146.21;Parent=HbmRNA00146
contig0017	jigsaw-2	gene	4471	5786	.	-	.	ID=Hbgene00147;Name=Hbgene00147
contig0017	jigsaw-2	mRNA	4471	5786	.	-	.	ID=HbmRNA00147;Parent=Hbgene00147
contig0017	jigsaw-2	CDS	4471	4534	29.3175	-	1	ID=Hbcds00147.1;Parent=HbmRNA00147
contig0017	jigsaw-2	CDS	5052	5095	33.0771	-	0	ID=Hbcds00147.2;Parent=HbmRNA00147
contig0017	jigsaw-2	CDS	5138	5168	27.8273	-	1	ID=Hbcds00147.3;Parent=HbmRNA00147
contig0017	jigsaw-2	CDS	5180	5239	33.6209	-	1	ID=Hbcds00147.4;Parent=HbmRNA00147
contig0017	jigsaw-2	CDS	5388	5587	34.3702	-	0	ID=Hbcds00147.5;Parent=HbmRNA00147
contig0017	jigsaw-2	CDS	5751	5786	28.2581	-	0	ID=Hbcds00147.6;Parent=HbmRNA00147
contig0017	jigsaw-2	gene	6349	6681	.	+	.	ID=Hbgene00148;Name=Hbgene00148
contig0017	jigsaw-2	mRNA	6349	6681	.	+	.	ID=HbmRNA00148;Parent=Hbgene00148
contig0017	jigsaw-2	CDS	6349	6379	-15.0742	+	0	ID=Hbcds00148.1;Parent=HbmRNA00148
contig0017	jigsaw-2	CDS	6407	6469	-28.2529	+	2	ID=Hbcds00148.2;Parent=HbmRNA00148
contig0017	jigsaw-2	CDS	6518	6681	3.32174	+	2	ID=Hbcds00148.3;Parent=HbmRNA00148
contig0017	jigsaw-2	gene	6757	7055	.	+	.	ID=Hbgene00149;Name=Hbgene00149
contig0017	jigsaw-2	mRNA	6757	7055	.	+	.	ID=HbmRNA00149;Parent=Hbgene00149
contig0017	jigsaw-2	CDS	6757	6859	0.168695	+	0	ID=Hbcds00149.1;Parent=HbmRNA00149
contig0017	jigsaw-2	CDS	6874	6918	-28.0558	+	2	ID=Hbcds00149.2;Parent=HbmRNA00149
contig0017	jigsaw-2	CDS	6982	7055	24.2994	+	2	ID=Hbcds00149.3;Parent=HbmRNA00149
contig0018	jigsaw-2	gene	11	501	.	+	.	ID=Hbgene00150;Name=Hbgene00150
contig0018	jigsaw-2	mRNA	11	501	.	+	.	ID=HbmRNA00150;Parent=Hbgene00150
contig0018	jigsaw-2	CDS	11	27	25.3809	+	0	ID=Hbcds00150.1;Parent=HbmRNA00150
contig0018	jigsaw-2	CDS	38	89	34.2692	+	1	ID=Hbcds00150.2;Parent=HbmRNA00150
contig0018	jigsaw-2	CDS	104	136	18.8621	+	0	ID=Hbcds00150.3;Parent=HbmRNA00150
contig0018	jigsaw-2	CDS	147	239	33.2652	+	0	ID=Hbcds00150.4;Parent=HbmRNA00150
contig0018	jigsaw-2	CDS	250	269	33.2	+	0	ID=Hbcds00150.5;Parent=HbmRNA00150
contig0018	jigsaw-2	CDS	289	406	-11.975	+	1	ID=Hbcds00150.6;Parent=HbmRNA00150
contig0018	jigsaw-2	CDS	418	501	21.5928	+	0	ID=Hbcds00150.7;Parent=HbmRNA00150
contig0018	jigsaw-2	gene	523	1002	.	+	.	ID=Hbgene00151;Name=Hbgene00151
contig0018	jigsaw-2	mRNA	523	1002	.	+	.	ID=HbmRNA00151;Parent=Hbgene00151
contig0018	jigsaw-2	CDS	523	596	16.2485	+	0	ID=Hbcds00151.1;Parent=HbmRNA00151
contig0018	jigsaw-2	CDS	613	646	11.7711	+	1	ID=Hbcds00151.2;Parent=HbmRNA00151
contig0018	jigsaw-2	CDS	716	764	34.2857	+	0	ID=Hbcds00151.3;Parent=HbmRNA00151
contig0018	jigsaw-2	CDS	779	1002	34.3982	+	2	ID=Hbcds00151.4;Parent=HbmRNA00151
contig0018	jigsaw-2	gene	1042	1300	.	+	.	ID=Hbgene00152;Name=Hbgene00152
contig0018	jigsaw-2	mRNA	1042	1300	.	+	.	ID=HbmRNA00152;Parent=Hbgene00152
contig0018	jigsaw-2	CDS	1042	1300	34.5926	+	0	ID=Hbcds00152.1;Parent=HbmRNA00152
contig0019	jigsaw-2	gene	3669	4139	.	-	.	ID=Hbgene00161;Name=Hbgene00161
contig0019	jigsaw-2	mRNA	3669	4139	.	-	.	ID=HbmRNA00161;Parent=Hbgene00161
contig0019	jigsaw-2	CDS	3669	3737	31.4063	-	0	ID=Hbcds00161.1;Parent=HbmRNA00161
contig0019	jigsaw-2	CDS	3748	3930	33.3438	-	0	ID=Hbcds00161.2;Parent=HbmRNA00161
contig0019	jigsaw-2	CDS	3943	3984	32.8214	-	0	ID=Hbcds00161.3;Parent=HbmRNA00161
contig0019	jigsaw-2	CDS	3999	4139	33.6877	-	0	ID=Hbcds00161.4;Parent=HbmRNA00161
contig0019	jigsaw-2	gene	4168	4404	.	+	.	ID=Hbgene00162;Name=Hbgene00162
contig0019	jigsaw-2	mRNA	4168	4404	.	+	.	ID=HbmRNA00162;Parent=Hbgene00162
contig0019	jigsaw-2	CDS	4168	4175	26	+	0	ID=Hbcds00162.1;Parent=HbmRNA00162
contig0019	jigsaw-2	CDS	4231	4244	31.5	+	1	ID=Hbcds00162.2;Parent=HbmRNA00162
contig0019	jigsaw-2	CDS	4287	4362	28.279	+	2	ID=Hbcds00162.3;Parent=HbmRNA00162
contig0019	jigsaw-2	CDS	4398	4404	29.1667	+	1	ID=Hbcds00162.4;Parent=HbmRNA00162
contig0019	jigsaw-2	gene	155	631	.	+	.	ID=Hbgene00153;Name=Hbgene00153
contig0019	jigsaw-2	mRNA	155	631	.	+	.	ID=HbmRNA00153;Parent=Hbgene00153
contig0019	jigsaw-2	CDS	155	298	2.27192	+	0	ID=Hbcds00153.1;Parent=HbmRNA00153
contig0019	jigsaw-2	CDS	322	423	30.782	+	0	ID=Hbcds00153.2;Parent=HbmRNA00153
contig0019	jigsaw-2	CDS	468	552	-13.5193	+	0	ID=Hbcds00153.3;Parent=HbmRNA00153
contig0019	jigsaw-2	CDS	573	631	30.2617	+	2	ID=Hbcds00153.4;Parent=HbmRNA00153
contig0019	jigsaw-2	gene	745	897	.	+	.	ID=Hbgene00154;Name=Hbgene00154
contig0019	jigsaw-2	mRNA	745	897	.	+	.	ID=HbmRNA00154;Parent=Hbgene00154
contig0019	jigsaw-2	CDS	745	757	31.5	+	0	ID=Hbcds00154.1;Parent=HbmRNA00154
contig0019	jigsaw-2	CDS	803	897	2.9838	+	2	ID=Hbcds00154.2;Parent=HbmRNA00154
contig0019	jigsaw-2	gene	921	1660	.	+	.	ID=Hbgene00155;Name=Hbgene00155
contig0019	jigsaw-2	mRNA	921	1660	.	+	.	ID=HbmRNA00155;Parent=Hbgene00155
contig0019	jigsaw-2	CDS	921	930	28	+	0	ID=Hbcds00155.1;Parent=HbmRNA00155
contig0019	jigsaw-2	CDS	966	1043	18.0481	+	2	ID=Hbcds00155.2;Parent=HbmRNA00155
contig0019	jigsaw-2	CDS	1097	1221	-28.4196	+	2	ID=Hbcds00155.3;Parent=HbmRNA00155
contig0019	jigsaw-2	CDS	1261	1278	32.0833	+	0	ID=Hbcds00155.4;Parent=HbmRNA00155
contig0019	jigsaw-2	CDS	1305	1334	32.9412	+	0	ID=Hbcds00155.5;Parent=HbmRNA00155
contig0019	jigsaw-2	CDS	1348	1414	20.2456	+	0	ID=Hbcds00155.6;Parent=HbmRNA00155
contig0019	jigsaw-2	CDS	1437	1660	8.03149	+	2	ID=Hbcds00155.7;Parent=HbmRNA00155
contig0019	jigsaw-2	gene	1690	1843	.	+	.	ID=Hbgene00156;Name=Hbgene00156
contig0019	jigsaw-2	mRNA	1690	1843	.	+	.	ID=HbmRNA00156;Parent=Hbgene00156
contig0019	jigsaw-2	CDS	1690	1715	-3.47895	+	0	ID=Hbcds00156.1;Parent=HbmRNA00156
contig0019	jigsaw-2	CDS	1726	1843	31.2597	+	1	ID=Hbcds00156.2;Parent=HbmRNA00156
contig0019	jigsaw-2	gene	1865	2238	.	+	.	ID=Hbgene00157;Name=Hbgene00157
contig0019	jigsaw-2	mRNA	1865	2238	.	+	.	ID=HbmRNA00157;Parent=Hbgene00157
contig0019	jigsaw-2	CDS	1865	1894	33.2942	+	0	ID=Hbcds00157.1;Parent=HbmRNA00157
contig0019	jigsaw-2	CDS	1978	2089	19.2233	+	0	ID=Hbcds00157.2;Parent=HbmRNA00157
contig0019	jigsaw-2	CDS	2100	2174	18.8538	+	2	ID=Hbcds00157.3;Parent=HbmRNA00157
contig0019	jigsaw-2	CDS	2192	2238	27.8329	+	2	ID=Hbcds00157.4;Parent=HbmRNA00157
contig0019	jigsaw-2	gene	2285	2562	.	+	.	ID=Hbgene00158;Name=Hbgene00158
contig0019	jigsaw-2	mRNA	2285	2562	.	+	.	ID=HbmRNA00158;Parent=Hbgene00158
contig0019	jigsaw-2	CDS	2285	2377	28.763	+	0	ID=Hbcds00158.1;Parent=HbmRNA00158
contig0019	jigsaw-2	CDS	2395	2439	27.7351	+	0	ID=Hbcds00158.2;Parent=HbmRNA00158
contig0019	jigsaw-2	CDS	2477	2505	33.3333	+	0	ID=Hbcds00158.3;Parent=HbmRNA00158
contig0019	jigsaw-2	CDS	2532	2562	25.3031	+	1	ID=Hbcds00158.4;Parent=HbmRNA00158
contig0019	jigsaw-2	gene	2592	2957	.	-	.	ID=Hbgene00159;Name=Hbgene00159
contig0019	jigsaw-2	mRNA	2592	2957	.	-	.	ID=HbmRNA00159;Parent=Hbgene00159
contig0019	jigsaw-2	CDS	2592	2813	34.672	-	0	ID=Hbcds00159.1;Parent=HbmRNA00159
contig0019	jigsaw-2	CDS	2904	2957	32.0412	-	0	ID=Hbcds00159.2;Parent=HbmRNA00159
contig0019	jigsaw-2	gene	2991	3557	.	+	.	ID=Hbgene00160;Name=Hbgene00160
contig0019	jigsaw-2	mRNA	2991	3557	.	+	.	ID=HbmRNA00160;Parent=Hbgene00160
contig0019	jigsaw-2	CDS	2991	3113	14.9634	+	0	ID=Hbcds00160.1;Parent=HbmRNA00160
contig0019	jigsaw-2	CDS	3200	3257	29.2483	+	0	ID=Hbcds00160.2;Parent=HbmRNA00160
contig0019	jigsaw-2	CDS	3297	3318	2.46292	+	2	ID=Hbcds00160.3;Parent=HbmRNA00160
contig0019	jigsaw-2	CDS	3367	3400	33.5063	+	1	ID=Hbcds00160.4;Parent=HbmRNA00160
contig0019	jigsaw-2	CDS	3416	3446	14.7211	+	0	ID=Hbcds00160.5;Parent=HbmRNA00160
contig0019	jigsaw-2	CDS	3469	3557	17.482	+	2	ID=Hbcds00160.6;Parent=HbmRNA00160
contig0020	jigsaw-2	gene	262	751	.	-	.	ID=Hbgene00163;Name=Hbgene00163
contig0020	jigsaw-2	mRNA	262	751	.	-	.	ID=HbmRNA00163;Parent=Hbgene00163
contig0020	jigsaw-2	CDS	262	483	27.4039	-	0	ID=Hbcds00163.1;Parent=HbmRNA00163
contig0020	jigsaw-2	CDS	502	578	34.3169	-	2	ID=Hbcds00163.2;Parent=HbmRNA00163
contig0020	jigsaw-2	CDS	593	631	33.9503	-	2	ID=Hbcds00163.3;Parent=HbmRNA00163
contig0020	jigsaw-2	CDS	657	696	33.9484	-	0	ID=Hbcds00163.4;Parent=HbmRNA00163
contig0020	jigsaw-2	CDS	707	751	33.1094	-	0	ID=Hbcds00163.5;Parent=HbmRNA00163
contig0020	jigsaw-2	gene	783	1532	.	+	.	ID=Hbgene00164;Name=Hbgene00164
contig0020	jigsaw-2	mRNA	783	1532	.	+	.	ID=HbmRNA00164;Parent=Hbgene00164
contig0020	jigsaw-2	CDS	783	832	33.1021	+	0	ID=Hbcds00164.1;Parent=HbmRNA00164
contig0020	jigsaw-2	CDS	859	950	31.2017	+	1	ID=Hbcds00164.2;Parent=HbmRNA00164
contig0020	jigsaw-2	CDS	961	1034	23.6601	+	2	ID=Hbcds00164.3;Parent=HbmRNA00164
contig0020	jigsaw-2	CDS	1046	1125	32.5101	+	0	ID=Hbcds00164.4;Parent=HbmRNA00164
contig0020	jigsaw-2	CDS	1137	1298	31.9948	+	1	ID=Hbcds00164.5;Parent=HbmRNA00164
contig0020	jigsaw-2	CDS	1335	1338	5.34821	+	1	ID=Hbcds00164.6;Parent=HbmRNA00164
contig0020	jigsaw-2	CDS	1364	1436	34.4613	+	0	ID=Hbcds00164.7;Parent=HbmRNA00164
contig0020	jigsaw-2	CDS	1454	1532	32.897	+	2	ID=Hbcds00164.8;Parent=HbmRNA00164
contig0021	jigsaw-2	gene	10909	12046	.	+	.	ID=Hbgene00170;Name=Hbgene00170
contig0021	jigsaw-2	mRNA	10909	12046	.	+	.	ID=HbmRNA00170;Parent=Hbgene00170
contig0021	jigsaw-2	CDS	10909	10996	6.48773	+	0	ID=Hbcds00170.1;Parent=HbmRNA00170
contig0021	jigsaw-2	CDS	11036	11079	-29.9571	+	2	ID=Hbcds00170.2;Parent=HbmRNA00170
contig0021	jigsaw-2	CDS	11111	11134	-29.3278	+	0	ID=Hbcds00170.3;Parent=HbmRNA00170
contig0021	jigsaw-2	CDS	11145	11198	-30.05	+	0	ID=Hbcds00170.4;Parent=HbmRNA00170
contig0021	jigsaw-2	CDS	11218	11246	-30.1538	+	0	ID=Hbcds00170.5;Parent=HbmRNA00170
contig0021	jigsaw-2	CDS	11609	11622	30	+	1	ID=Hbcds00170.6;Parent=HbmRNA00170
contig0021	jigsaw-2	CDS	11642	11672	17.1342	+	2	ID=Hbcds00170.7;Parent=HbmRNA00170
contig0021	jigsaw-2	CDS	11683	11824	5.00341	+	1	ID=Hbcds00170.8;Parent=HbmRNA00170
contig0021	jigsaw-2	CDS	11893	11920	-28.3791	+	0	ID=Hbcds00170.9;Parent=HbmRNA00170
contig0021	jigsaw-2	CDS	12009	12046	14.3233	+	2	ID=Hbcds00170.10;Parent=HbmRNA00170
contig0021	jigsaw-2	gene	2677	3661	.	+	.	ID=Hbgene00165;Name=Hbgene00165
contig0021	jigsaw-2	mRNA	2677	3661	.	+	.	ID=HbmRNA00165;Parent=Hbgene00165
contig0021	jigsaw-2	CDS	2677	2681	-18.5607	+	0	ID=Hbcds00165.1;Parent=HbmRNA00165
contig0021	jigsaw-2	CDS	2717	2720	-23.913	+	1	ID=Hbcds00165.2;Parent=HbmRNA00165
contig0021	jigsaw-2	CDS	3522	3587	-27.2704	+	0	ID=Hbcds00165.3;Parent=HbmRNA00165
contig0021	jigsaw-2	CDS	3653	3661	-26.5271	+	0	ID=Hbcds00165.4;Parent=HbmRNA00165
contig0021	jigsaw-2	gene	3697	4193	.	-	.	ID=Hbgene00166;Name=Hbgene00166
contig0021	jigsaw-2	mRNA	3697	4193	.	-	.	ID=HbmRNA00166;Parent=Hbgene00166
contig0021	jigsaw-2	CDS	3697	3726	28.6242	-	0	ID=Hbcds00166.1;Parent=HbmRNA00166
contig0021	jigsaw-2	CDS	3748	4049	31.7109	-	2	ID=Hbcds00166.2;Parent=HbmRNA00166
contig0021	jigsaw-2	CDS	4169	4193	22.0768	-	0	ID=Hbcds00166.3;Parent=HbmRNA00166
contig0021	jigsaw-2	gene	4265	4607	.	+	.	ID=Hbgene00167;Name=Hbgene00167
contig0021	jigsaw-2	mRNA	4265	4607	.	+	.	ID=HbmRNA00167;Parent=Hbgene00167
contig0021	jigsaw-2	CDS	4265	4383	0.896776	+	0	ID=Hbcds00167.1;Parent=HbmRNA00167
contig0021	jigsaw-2	CDS	4523	4607	3.16783	+	1	ID=Hbcds00167.2;Parent=HbmRNA00167
contig0021	jigsaw-2	gene	5889	6286	.	+	.	ID=Hbgene00168;Name=Hbgene00168
contig0021	jigsaw-2	mRNA	5889	6286	.	+	.	ID=HbmRNA00168;Parent=Hbgene00168
contig0021	jigsaw-2	CDS	5889	5957	12.6667	+	0	ID=Hbcds00168.1;Parent=HbmRNA00168
contig0021	jigsaw-2	CDS	5992	6096	-31.9782	+	0	ID=Hbcds00168.2;Parent=HbmRNA00168
contig0021	jigsaw-2	CDS	6212	6286	21.8883	+	0	ID=Hbcds00168.3;Parent=HbmRNA00168
contig0021	jigsaw-2	gene	7311	10614	.	-	.	ID=Hbgene00169;Name=Hbgene00169
contig0021	jigsaw-2	mRNA	7311	10614	.	-	.	ID=HbmRNA00169;Parent=Hbgene00169
contig0021	jigsaw-2	CDS	7311	7790	12.2488	-	0	ID=Hbcds00169.1;Parent=HbmRNA00169
contig0021	jigsaw-2	CDS	8102	8235	32.5346	-	2	ID=Hbcds00169.2;Parent=HbmRNA00169
contig0021	jigsaw-2	CDS	8534	8538	0	-	1	ID=Hbcds00169.3;Parent=HbmRNA00169
contig0021	jigsaw-2	CDS	8958	9016	32.7943	-	0	ID=Hbcds00169.4;Parent=HbmRNA00169
contig0021	jigsaw-2	CDS	9697	10091	-20.8263	-	2	ID=Hbcds00169.5;Parent=HbmRNA00169
contig0021	jigsaw-2	CDS	10356	10460	30.595	-	2	ID=Hbcds00169.6;Parent=HbmRNA00169
contig0021	jigsaw-2	CDS	10513	10583	29.7356	-	1	ID=Hbcds00169.7;Parent=HbmRNA00169
contig0021	jigsaw-2	CDS	10598	10614	21.0182	-	0	ID=Hbcds00169.8;Parent=HbmRNA00169
contig0022	jigsaw-2	gene	531	1882	.	+	.	ID=Hbgene00171;Name=Hbgene00171
contig0022	jigsaw-2	mRNA	531	1882	.	+	.	ID=HbmRNA00171;Parent=Hbgene00171
contig0022	jigsaw-2	CDS	531	543	-2	+	0	ID=Hbcds00171.1;Parent=HbmRNA00171
contig0022	jigsaw-2	CDS	569	757	15.4015	+	2	ID=Hbcds00171.2;Parent=HbmRNA00171
contig0022	jigsaw-2	CDS	782	1112	18.4715	+	2	ID=Hbcds00171.3;Parent=HbmRNA00171
contig0022	jigsaw-2	CDS	1124	1260	28.7507	+	1	ID=Hbcds00171.4;Parent=HbmRNA00171
contig0022	jigsaw-2	CDS	1283	1367	9.28548	+	2	ID=Hbcds00171.5;Parent=HbmRNA00171
contig0022	jigsaw-2	CDS	1378	1490	-28.2408	+	1	ID=Hbcds00171.6;Parent=HbmRNA00171
contig0022	jigsaw-2	CDS	1526	1533	30.625	+	2	ID=Hbcds00171.7;Parent=HbmRNA00171
contig0022	jigsaw-2	CDS	1572	1662	19.036	+	0	ID=Hbcds00171.8;Parent=HbmRNA00171
contig0022	jigsaw-2	CDS	1696	1728	33.881	+	2	ID=Hbcds00171.9;Parent=HbmRNA00171
contig0022	jigsaw-2	CDS	1743	1882	34.2151	+	2	ID=Hbcds00171.10;Parent=HbmRNA00171
contig0023	jigsaw-2	gene	24148	24358	.	+	.	ID=Hbgene00179;Name=Hbgene00179
contig0023	jigsaw-2	mRNA	24148	24358	.	+	.	ID=HbmRNA00179;Parent=Hbgene00179
contig0023	jigsaw-2	CDS	24148	24245	0	+	0	ID=Hbcds00179.1;Parent=HbmRNA00179
contig0023	jigsaw-2	CDS	24295	24358	1.53846	+	1	ID=Hbcds00179.2;Parent=HbmRNA00179
contig0023	jigsaw-2	gene	25269	27017	.	+	.	ID=Hbgene00180;Name=Hbgene00180
contig0023	jigsaw-2	mRNA	25269	27017	.	+	.	ID=HbmRNA00180;Parent=Hbgene00180
contig0023	jigsaw-2	CDS	25269	25348	0	+	0	ID=Hbcds00180.1;Parent=HbmRNA00180
contig0023	jigsaw-2	CDS	26924	27017	0	+	1	ID=Hbcds00180.2;Parent=HbmRNA00180
contig0023	jigsaw-2	gene	28190	28523	.	+	.	ID=Hbgene00181;Name=Hbgene00181
contig0023	jigsaw-2	mRNA	28190	28523	.	+	.	ID=HbmRNA00181;Parent=Hbgene00181
contig0023	jigsaw-2	CDS	28190	28405	0	+	0	ID=Hbcds00181.1;Parent=HbmRNA00181
contig0023	jigsaw-2	CDS	28476	28523	0	+	0	ID=Hbcds00181.2;Parent=HbmRNA00181
contig0023	jigsaw-2	gene	29638	34467	.	-	.	ID=Hbgene00182;Name=Hbgene00182
contig0023	jigsaw-2	mRNA	29638	34467	.	-	.	ID=HbmRNA00182;Parent=Hbgene00182
contig0023	jigsaw-2	CDS	29638	29882	3.81097	-	2	ID=Hbcds00182.1;Parent=HbmRNA00182
contig0023	jigsaw-2	CDS	29932	30166	17.2323	-	0	ID=Hbcds00182.2;Parent=HbmRNA00182
contig0023	jigsaw-2	CDS	30419	30493	-34.3726	-	0	ID=Hbcds00182.3;Parent=HbmRNA00182
contig0023	jigsaw-2	CDS	30560	30722	-35.4989	-	1	ID=Hbcds00182.4;Parent=HbmRNA00182
contig0023	jigsaw-2	CDS	31038	31106	-41.1841	-	1	ID=Hbcds00182.5;Parent=HbmRNA00182
contig0023	jigsaw-2	CDS	31162	31304	-26.1298	-	0	ID=Hbcds00182.6;Parent=HbmRNA00182
contig0023	jigsaw-2	CDS	31395	31516	-41.1964	-	2	ID=Hbcds00182.7;Parent=HbmRNA00182
contig0023	jigsaw-2	CDS	31595	31673	-35.1606	-	0	ID=Hbcds00182.8;Parent=HbmRNA00182
contig0023	jigsaw-2	CDS	31938	32043	-27	-	1	ID=Hbcds00182.9;Parent=HbmRNA00182
contig0023	jigsaw-2	CDS	32105	32161	-25	-	1	ID=Hbcds00182.10;Parent=HbmRNA00182
contig0023	jigsaw-2	CDS	32220	32347	-34.8037	-	0	ID=Hbcds00182.11;Parent=HbmRNA00182
contig0023	jigsaw-2	CDS	32459	32542	0	-	0	ID=Hbcds00182.12;Parent=HbmRNA00182
contig0023	jigsaw-2	CDS	33048	33164	31.3846	-	0	ID=Hbcds00182.13;Parent=HbmRNA00182
contig0023	jigsaw-2	CDS	33185	33220	-42.5	-	0	ID=Hbcds00182.14;Parent=HbmRNA00182
contig0023	jigsaw-2	CDS	33728	33885	-30.1818	-	2	ID=Hbcds00182.15;Parent=HbmRNA00182
contig0023	jigsaw-2	CDS	34425	34467	-29.0781	-	0	ID=Hbcds00182.16;Parent=HbmRNA00182
contig0023	jigsaw-2	gene	34925	38223	.	+	.	ID=Hbgene00183;Name=Hbgene00183
contig0023	jigsaw-2	mRNA	34925	38223	.	+	.	ID=HbmRNA00183;Parent=Hbgene00183
contig0023	jigsaw-2	CDS	34925	35005	-22.3333	+	0	ID=Hbcds00183.1;Parent=HbmRNA00183
contig0023	jigsaw-2	CDS	35470	35588	-40.25	+	0	ID=Hbcds00183.2;Parent=HbmRNA00183
contig0023	jigsaw-2	CDS	35843	35961	3.46154	+	1	ID=Hbcds00183.3;Parent=HbmRNA00183
contig0023	jigsaw-2	CDS	36396	36628	-14.9481	+	2	ID=Hbcds00183.4;Parent=HbmRNA00183
contig0023	jigsaw-2	CDS	37850	38011	-28	+	0	ID=Hbcds00183.5;Parent=HbmRNA00183
contig0023	jigsaw-2	CDS	38194	38223	-27.9917	+	0	ID=Hbcds00183.6;Parent=HbmRNA00183
contig0023	jigsaw-2	gene	38841	39209	.	-	.	ID=Hbgene00184;Name=Hbgene00184
contig0023	jigsaw-2	mRNA	38841	39209	.	-	.	ID=HbmRNA00184;Parent=Hbgene00184
contig0023	jigsaw-2	CDS	38841	39209	-27.5021	-	0	ID=Hbcds00184.1;Parent=HbmRNA00184
contig0023	jigsaw-2	gene	43815	49806	.	-	.	ID=Hbgene00185;Name=Hbgene00185
contig0023	jigsaw-2	mRNA	43815	49806	.	-	.	ID=HbmRNA00185;Parent=Hbgene00185
contig0023	jigsaw-2	CDS	43815	43873	1.5	-	2	ID=Hbcds00185.1;Parent=HbmRNA00185
contig0023	jigsaw-2	CDS	44092	44243	19.0109	-	1	ID=Hbcds00185.2;Parent=HbmRNA00185
contig0023	jigsaw-2	CDS	46492	46577	-43.5079	-	0	ID=Hbcds00185.3;Parent=HbmRNA00185
contig0023	jigsaw-2	CDS	46669	46821	-38.8431	-	0	ID=Hbcds00185.4;Parent=HbmRNA00185
contig0023	jigsaw-2	CDS	46892	47002	-28	-	0	ID=Hbcds00185.5;Parent=HbmRNA00185
contig0023	jigsaw-2	CDS	47062	47187	-43.6	-	0	ID=Hbcds00185.6;Parent=HbmRNA00185
contig0023	jigsaw-2	CDS	47264	47383	-28	-	0	ID=Hbcds00185.7;Parent=HbmRNA00185
contig0023	jigsaw-2	CDS	47439	47523	-28	-	1	ID=Hbcds00185.8;Parent=HbmRNA00185
contig0023	jigsaw-2	CDS	48122	48159	17.0577	-	0	ID=Hbcds00185.9;Parent=HbmRNA00185
contig0023	jigsaw-2	CDS	48853	49011	-28	-	0	ID=Hbcds00185.10;Parent=HbmRNA00185
contig0023	jigsaw-2	CDS	49116	49244	-28	-	0	ID=Hbcds00185.11;Parent=HbmRNA00185
contig0023	jigsaw-2	CDS	49771	49806	-31	-	0	ID=Hbcds00185.12;Parent=HbmRNA00185
contig0023	jigsaw-2	gene	50944	51339	.	+	.	ID=Hbgene00186;Name=Hbgene00186
contig0023	jigsaw-2	mRNA	50944	51339	.	+	.	ID=HbmRNA00186;Parent=Hbgene00186
contig0023	jigsaw-2	CDS	50944	51119	-32.2656	+	0	ID=Hbcds00186.1;Parent=HbmRNA00186
contig0023	jigsaw-2	CDS	51204	51339	9.64571	+	1	ID=Hbcds00186.2;Parent=HbmRNA00186
contig0023	jigsaw-2	gene	56602	56863	.	-	.	ID=Hbgene00187;Name=Hbgene00187
contig0023	jigsaw-2	mRNA	56602	56863	.	-	.	ID=HbmRNA00187;Parent=Hbgene00187
contig0023	jigsaw-2	CDS	56602	56682	0	-	0	ID=Hbcds00187.1;Parent=HbmRNA00187
contig0023	jigsaw-2	CDS	56738	56863	0	-	0	ID=Hbcds00187.2;Parent=HbmRNA00187
contig0023	jigsaw-2	gene	57475	57828	.	+	.	ID=Hbgene00188;Name=Hbgene00188
contig0023	jigsaw-2	mRNA	57475	57828	.	+	.	ID=HbmRNA00188;Parent=Hbgene00188
contig0023	jigsaw-2	CDS	57475	57520	-33	+	0	ID=Hbcds00188.1;Parent=HbmRNA00188
contig0023	jigsaw-2	CDS	57692	57828	-13.5	+	2	ID=Hbcds00188.2;Parent=HbmRNA00188
contig0023	jigsaw-2	gene	2548	2783	.	+	.	ID=Hbgene00172;Name=Hbgene00172
contig0023	jigsaw-2	mRNA	2548	2783	.	+	.	ID=HbmRNA00172;Parent=Hbgene00172
contig0023	jigsaw-2	CDS	2548	2575	-33.894	+	0	ID=Hbcds00172.1;Parent=HbmRNA00172
contig0023	jigsaw-2	CDS	2722	2783	-12	+	2	ID=Hbcds00172.2;Parent=HbmRNA00172
contig0023	jigsaw-2	gene	59289	60849	.	+	.	ID=Hbgene00189;Name=Hbgene00189
contig0023	jigsaw-2	mRNA	59289	60849	.	+	.	ID=HbmRNA00189;Parent=Hbgene00189
contig0023	jigsaw-2	CDS	59289	59293	-33.637	+	0	ID=Hbcds00189.1;Parent=HbmRNA00189
contig0023	jigsaw-2	CDS	59349	59472	-45.9006	+	1	ID=Hbcds00189.2;Parent=HbmRNA00189
contig0023	jigsaw-2	CDS	60649	60849	-3.65151	+	0	ID=Hbcds00189.3;Parent=HbmRNA00189
contig0023	jigsaw-2	gene	61269	62153	.	+	.	ID=Hbgene00190;Name=Hbgene00190
contig0023	jigsaw-2	mRNA	61269	62153	.	+	.	ID=HbmRNA00190;Parent=Hbgene00190
contig0023	jigsaw-2	CDS	61269	61334	-32	+	0	ID=Hbcds00190.1;Parent=HbmRNA00190
contig0023	jigsaw-2	CDS	61395	61526	-32.6667	+	0	ID=Hbcds00190.2;Parent=HbmRNA00190
contig0023	jigsaw-2	CDS	61713	61848	-30	+	0	ID=Hbcds00190.3;Parent=HbmRNA00190
contig0023	jigsaw-2	CDS	61915	62153	5.36111	+	2	ID=Hbcds00190.4;Parent=HbmRNA00190
contig0023	jigsaw-2	gene	62576	66815	.	+	.	ID=Hbgene00191;Name=Hbgene00191
contig0023	jigsaw-2	mRNA	62576	66815	.	+	.	ID=HbmRNA00191;Parent=Hbgene00191
contig0023	jigsaw-2	CDS	62576	62618	-33.5	+	0	ID=Hbcds00191.1;Parent=HbmRNA00191
contig0023	jigsaw-2	CDS	64892	65002	-29.3402	+	2	ID=Hbcds00191.2;Parent=HbmRNA00191
contig0023	jigsaw-2	CDS	66219	66276	-37.5906	+	2	ID=Hbcds00191.3;Parent=HbmRNA00191
contig0023	jigsaw-2	CDS	66395	66398	-23.9672	+	1	ID=Hbcds00191.4;Parent=HbmRNA00191
contig0023	jigsaw-2	CDS	66681	66815	-16.9929	+	0	ID=Hbcds00191.5;Parent=HbmRNA00191
contig0023	jigsaw-2	gene	67066	80933	.	-	.	ID=Hbgene00192;Name=Hbgene00192
contig0023	jigsaw-2	mRNA	67066	80933	.	-	.	ID=HbmRNA00192;Parent=Hbgene00192
contig0023	jigsaw-2	CDS	67066	67133	-3.46601	-	2	ID=Hbcds00192.1;Parent=HbmRNA00192
contig0023	jigsaw-2	CDS	67236	67356	-33.4733	-	0	ID=Hbcds00192.2;Parent=HbmRNA00192
contig0023	jigsaw-2	CDS	67406	67662	0.19427	-	2	ID=Hbcds00192.3;Parent=HbmRNA00192
contig0023	jigsaw-2	CDS	68442	68591	9.6	-	2	ID=Hbcds00192.4;Parent=HbmRNA00192
contig0023	jigsaw-2	CDS	69072	69178	-41.5673	-	1	ID=Hbcds00192.5;Parent=HbmRNA00192
contig0023	jigsaw-2	CDS	69298	69407	-37.4068	-	0	ID=Hbcds00192.6;Parent=HbmRNA00192
contig0023	jigsaw-2	CDS	69502	69546	-41	-	0	ID=Hbcds00192.7;Parent=HbmRNA00192
contig0023	jigsaw-2	CDS	69608	69679	-40.8774	-	0	ID=Hbcds00192.8;Parent=HbmRNA00192
contig0023	jigsaw-2	CDS	69803	69870	-33.8208	-	2	ID=Hbcds00192.9;Parent=HbmRNA00192
contig0023	jigsaw-2	CDS	70891	71035	22.7083	-	0	ID=Hbcds00192.10;Parent=HbmRNA00192
contig0023	jigsaw-2	CDS	71918	72096	19.1353	-	2	ID=Hbcds00192.11;Parent=HbmRNA00192
contig0023	jigsaw-2	CDS	72702	72702	-24	-	0	ID=Hbcds00192.12;Parent=HbmRNA00192
contig0023	jigsaw-2	CDS	72763	72840	-41.6458	-	0	ID=Hbcds00192.13;Parent=HbmRNA00192
contig0023	jigsaw-2	CDS	72900	72903	17.013	-	1	ID=Hbcds00192.14;Parent=HbmRNA00192
contig0023	jigsaw-2	CDS	73438	73649	-28.0067	-	0	ID=Hbcds00192.15;Parent=HbmRNA00192
contig0023	jigsaw-2	CDS	73981	74372	-22.2267	-	2	ID=Hbcds00192.16;Parent=HbmRNA00192
contig0023	jigsaw-2	CDS	74497	74642	-35.6	-	1	ID=Hbcds00192.17;Parent=HbmRNA00192
contig0023	jigsaw-2	CDS	74715	74789	0	-	1	ID=Hbcds00192.18;Parent=HbmRNA00192
contig0023	jigsaw-2	CDS	77033	77149	0	-	1	ID=Hbcds00192.19;Parent=HbmRNA00192
contig0023	jigsaw-2	CDS	77212	77290	0	-	2	ID=Hbcds00192.20;Parent=HbmRNA00192
contig0023	jigsaw-2	CDS	78407	78448	31.8434	-	2	ID=Hbcds00192.21;Parent=HbmRNA00192
contig0023	jigsaw-2	CDS	80861	80933	22.3333	-	0	ID=Hbcds00192.22;Parent=HbmRNA00192
contig0023	jigsaw-2	gene	83339	83537	.	-	.	ID=Hbgene00193;Name=Hbgene00193
contig0023	jigsaw-2	mRNA	83339	83537	.	-	.	ID=HbmRNA00193;Parent=Hbgene00193
contig0023	jigsaw-2	CDS	83339	83452	0	-	0	ID=Hbcds00193.1;Parent=HbmRNA00193
contig0023	jigsaw-2	CDS	83511	83537	0	-	0	ID=Hbcds00193.2;Parent=HbmRNA00193
contig0023	jigsaw-2	gene	87015	94134	.	+	.	ID=Hbgene00194;Name=Hbgene00194
contig0023	jigsaw-2	mRNA	87015	94134	.	+	.	ID=HbmRNA00194;Parent=Hbgene00194
contig0023	jigsaw-2	CDS	87015	87045	28	+	0	ID=Hbcds00194.1;Parent=HbmRNA00194
contig0023	jigsaw-2	CDS	87501	87638	33.1579	+	2	ID=Hbcds00194.2;Parent=HbmRNA00194
contig0023	jigsaw-2	CDS	89328	89351	-23.8333	+	2	ID=Hbcds00194.3;Parent=HbmRNA00194
contig0023	jigsaw-2	CDS	90157	90186	0	+	2	ID=Hbcds00194.4;Parent=HbmRNA00194
contig0023	jigsaw-2	CDS	94115	94134	18	+	2	ID=Hbcds00194.5;Parent=HbmRNA00194
contig0023	jigsaw-2	gene	96233	97734	.	+	.	ID=Hbgene00195;Name=Hbgene00195
contig0023	jigsaw-2	mRNA	96233	97734	.	+	.	ID=HbmRNA00195;Parent=Hbgene00195
contig0023	jigsaw-2	CDS	96233	96287	0	+	0	ID=Hbcds00195.1;Parent=HbmRNA00195
contig0023	jigsaw-2	CDS	96920	97035	-32.2043	+	2	ID=Hbcds00195.2;Parent=HbmRNA00195
contig0023	jigsaw-2	CDS	97122	97317	-15.2264	+	0	ID=Hbcds00195.3;Parent=HbmRNA00195
contig0023	jigsaw-2	CDS	97673	97734	0	+	2	ID=Hbcds00195.4;Parent=HbmRNA00195
contig0023	jigsaw-2	gene	97880	100720	.	+	.	ID=Hbgene00196;Name=Hbgene00196
contig0023	jigsaw-2	mRNA	97880	100720	.	+	.	ID=HbmRNA00196;Parent=Hbgene00196
contig0023	jigsaw-2	CDS	97880	97934	-31	+	0	ID=Hbcds00196.1;Parent=HbmRNA00196
contig0023	jigsaw-2	CDS	98336	98497	-28	+	2	ID=Hbcds00196.2;Parent=HbmRNA00196
contig0023	jigsaw-2	CDS	98972	99100	-28	+	2	ID=Hbcds00196.3;Parent=HbmRNA00196
contig0023	jigsaw-2	CDS	99550	99563	-46.8421	+	2	ID=Hbcds00196.4;Parent=HbmRNA00196
contig0023	jigsaw-2	CDS	100083	100218	-28	+	0	ID=Hbcds00196.5;Parent=HbmRNA00196
contig0023	jigsaw-2	CDS	100345	100386	-28	+	2	ID=Hbcds00196.6;Parent=HbmRNA00196
contig0023	jigsaw-2	CDS	100473	100720	-27	+	2	ID=Hbcds00196.7;Parent=HbmRNA00196
contig0023	jigsaw-2	gene	105538	106847	.	-	.	ID=Hbgene00197;Name=Hbgene00197
contig0023	jigsaw-2	mRNA	105538	106847	.	-	.	ID=HbmRNA00197;Parent=Hbgene00197
contig0023	jigsaw-2	CDS	105538	105719	-11.5	-	2	ID=Hbcds00197.1;Parent=HbmRNA00197
contig0023	jigsaw-2	CDS	105982	106093	-36.7073	-	0	ID=Hbcds00197.2;Parent=HbmRNA00197
contig0023	jigsaw-2	CDS	106153	106551	-5.00534	-	0	ID=Hbcds00197.3;Parent=HbmRNA00197
contig0023	jigsaw-2	CDS	106683	106847	-30.5783	-	0	ID=Hbcds00197.4;Parent=HbmRNA00197
contig0023	jigsaw-2	gene	107920	108233	.	+	.	ID=Hbgene00198;Name=Hbgene00198
contig0023	jigsaw-2	mRNA	107920	108233	.	+	.	ID=HbmRNA00198;Parent=Hbgene00198
contig0023	jigsaw-2	CDS	107920	108144	2	+	0	ID=Hbcds00198.1;Parent=HbmRNA00198
contig0023	jigsaw-2	CDS	108198	108233	0	+	0	ID=Hbcds00198.2;Parent=HbmRNA00198
contig0023	jigsaw-2	gene	108347	108528	.	-	.	ID=Hbgene00199;Name=Hbgene00199
contig0023	jigsaw-2	mRNA	108347	108528	.	-	.	ID=HbmRNA00199;Parent=Hbgene00199
contig0023	jigsaw-2	CDS	108347	108451	24.7604	-	0	ID=Hbcds00199.1;Parent=HbmRNA00199
contig0023	jigsaw-2	CDS	108502	108528	0	-	0	ID=Hbcds00199.2;Parent=HbmRNA00199
contig0023	jigsaw-2	gene	108650	109461	.	-	.	ID=Hbgene00200;Name=Hbgene00200
contig0023	jigsaw-2	mRNA	108650	109461	.	-	.	ID=HbmRNA00200;Parent=Hbgene00200
contig0023	jigsaw-2	CDS	108650	108723	16.5741	-	2	ID=Hbcds00200.1;Parent=HbmRNA00200
contig0023	jigsaw-2	CDS	108851	108989	30.2569	-	0	ID=Hbcds00200.2;Parent=HbmRNA00200
contig0023	jigsaw-2	CDS	109069	109194	27.2626	-	0	ID=Hbcds00200.3;Parent=HbmRNA00200
contig0023	jigsaw-2	CDS	109261	109461	31.9471	-	0	ID=Hbcds00200.4;Parent=HbmRNA00200
contig0023	jigsaw-2	gene	109822	110984	.	-	.	ID=Hbgene00201;Name=Hbgene00201
contig0023	jigsaw-2	mRNA	109822	110984	.	-	.	ID=HbmRNA00201;Parent=Hbgene00201
contig0023	jigsaw-2	CDS	109822	109959	-16.3333	-	0	ID=Hbcds00201.1;Parent=HbmRNA00201
contig0023	jigsaw-2	CDS	110024	110158	27.8667	-	0	ID=Hbcds00201.2;Parent=HbmRNA00201
contig0023	jigsaw-2	CDS	110696	110841	1.5	-	2	ID=Hbcds00201.3;Parent=HbmRNA00201
contig0023	jigsaw-2	CDS	110918	110984	0	-	0	ID=Hbcds00201.4;Parent=HbmRNA00201
contig0023	jigsaw-2	gene	112574	117657	.	-	.	ID=Hbgene00202;Name=Hbgene00202
contig0023	jigsaw-2	mRNA	112574	117657	.	-	.	ID=HbmRNA00202;Parent=Hbgene00202
contig0023	jigsaw-2	CDS	112574	112668	18.1469	-	2	ID=Hbcds00202.1;Parent=HbmRNA00202
contig0023	jigsaw-2	CDS	114713	114787	0	-	2	ID=Hbcds00202.2;Parent=HbmRNA00202
contig0023	jigsaw-2	CDS	114838	114964	2	-	0	ID=Hbcds00202.3;Parent=HbmRNA00202
contig0023	jigsaw-2	CDS	116709	116734	0	-	2	ID=Hbcds00202.4;Parent=HbmRNA00202
contig0023	jigsaw-2	CDS	117106	117259	0	-	0	ID=Hbcds00202.5;Parent=HbmRNA00202
contig0023	jigsaw-2	CDS	117351	117405	0	-	1	ID=Hbcds00202.6;Parent=HbmRNA00202
contig0023	jigsaw-2	CDS	117578	117657	0	-	0	ID=Hbcds00202.7;Parent=HbmRNA00202
contig0023	jigsaw-2	gene	117830	120421	.	+	.	ID=Hbgene00203;Name=Hbgene00203
contig0023	jigsaw-2	mRNA	117830	120421	.	+	.	ID=HbmRNA00203;Parent=Hbgene00203
contig0023	jigsaw-2	CDS	117830	117843	-30	+	0	ID=Hbcds00203.1;Parent=HbmRNA00203
contig0023	jigsaw-2	CDS	118330	118564	-27	+	1	ID=Hbcds00203.2;Parent=HbmRNA00203
contig0023	jigsaw-2	CDS	119049	119195	-28.8316	+	0	ID=Hbcds00203.3;Parent=HbmRNA00203
contig0023	jigsaw-2	CDS	119650	119853	-21.2256	+	0	ID=Hbcds00203.4;Parent=HbmRNA00203
contig0023	jigsaw-2	CDS	119937	120023	-35.8335	+	0	ID=Hbcds00203.5;Parent=HbmRNA00203
contig0023	jigsaw-2	CDS	120365	120421	0.681818	+	0	ID=Hbcds00203.6;Parent=HbmRNA00203
contig0023	jigsaw-2	gene	120556	120898	.	+	.	ID=Hbgene00204;Name=Hbgene00204
contig0023	jigsaw-2	mRNA	120556	120898	.	+	.	ID=HbmRNA00204;Parent=Hbgene00204
contig0023	jigsaw-2	CDS	120556	120680	-19.172	+	0	ID=Hbcds00204.1;Parent=HbmRNA00204
contig0023	jigsaw-2	CDS	120796	120898	-8.30882	+	1	ID=Hbcds00204.2;Parent=HbmRNA00204
contig0023	jigsaw-2	gene	126229	130354	.	-	.	ID=Hbgene00205;Name=Hbgene00205
contig0023	jigsaw-2	mRNA	126229	130354	.	-	.	ID=HbmRNA00205;Parent=Hbgene00205
contig0023	jigsaw-2	CDS	126229	126358	28.6323	-	1	ID=Hbcds00205.1;Parent=HbmRNA00205
contig0023	jigsaw-2	CDS	126475	126727	0	-	2	ID=Hbcds00205.2;Parent=HbmRNA00205
contig0023	jigsaw-2	CDS	126882	126967	0	-	1	ID=Hbcds00205.3;Parent=HbmRNA00205
contig0023	jigsaw-2	CDS	127075	127117	22.7436	-	2	ID=Hbcds00205.4;Parent=HbmRNA00205
contig0023	jigsaw-2	CDS	128645	128881	-4.98913	-	2	ID=Hbcds00205.5;Parent=HbmRNA00205
contig0023	jigsaw-2	CDS	128953	129076	-38.3333	-	0	ID=Hbcds00205.6;Parent=HbmRNA00205
contig0023	jigsaw-2	CDS	129149	129196	-41.6111	-	0	ID=Hbcds00205.7;Parent=HbmRNA00205
contig0023	jigsaw-2	CDS	129272	129328	-24	-	0	ID=Hbcds00205.8;Parent=HbmRNA00205
contig0023	jigsaw-2	CDS	129474	129603	-42.5	-	1	ID=Hbcds00205.9;Parent=HbmRNA00205
contig0023	jigsaw-2	CDS	129666	129740	-28	-	1	ID=Hbcds00205.10;Parent=HbmRNA00205
contig0023	jigsaw-2	CDS	129801	129880	-18.3333	-	0	ID=Hbcds00205.11;Parent=HbmRNA00205
contig0023	jigsaw-2	CDS	129938	130018	-27	-	0	ID=Hbcds00205.12;Parent=HbmRNA00205
contig0023	jigsaw-2	CDS	130097	130206	-38	-	2	ID=Hbcds00205.13;Parent=HbmRNA00205
contig0023	jigsaw-2	CDS	130306	130354	-20	-	0	ID=Hbcds00205.14;Parent=HbmRNA00205
contig0023	jigsaw-2	gene	131149	133579	.	-	.	ID=Hbgene00206;Name=Hbgene00206
contig0023	jigsaw-2	mRNA	131149	133579	.	-	.	ID=HbmRNA00206;Parent=Hbgene00206
contig0023	jigsaw-2	CDS	131149	131308	8.5	-	1	ID=Hbcds00206.1;Parent=HbmRNA00206
contig0023	jigsaw-2	CDS	131405	131508	-36.2338	-	0	ID=Hbcds00206.2;Parent=HbmRNA00206
contig0023	jigsaw-2	CDS	131611	131697	-26.5399	-	0	ID=Hbcds00206.3;Parent=HbmRNA00206
contig0023	jigsaw-2	CDS	131766	131822	-26.5399	-	0	ID=Hbcds00206.4;Parent=HbmRNA00206
contig0023	jigsaw-2	CDS	131899	132018	-38.7736	-	0	ID=Hbcds00206.5;Parent=HbmRNA00206
contig0023	jigsaw-2	CDS	132305	132435	9.14574	-	2	ID=Hbcds00206.6;Parent=HbmRNA00206
contig0023	jigsaw-2	CDS	132474	132612	-28.65	-	0	ID=Hbcds00206.7;Parent=HbmRNA00206
contig0023	jigsaw-2	CDS	132680	132810	-27.998	-	2	ID=Hbcds00206.8;Parent=HbmRNA00206
contig0023	jigsaw-2	CDS	133382	133503	-39.3908	-	1	ID=Hbcds00206.9;Parent=HbmRNA00206
contig0023	jigsaw-2	CDS	133560	133579	-30	-	0	ID=Hbcds00206.10;Parent=HbmRNA00206
contig0023	jigsaw-2	gene	133955	136754	.	-	.	ID=Hbgene00207;Name=Hbgene00207
contig0023	jigsaw-2	mRNA	133955	136754	.	-	.	ID=HbmRNA00207;Parent=Hbgene00207
contig0023	jigsaw-2	CDS	133955	134062	2.4	-	0	ID=Hbcds00207.1;Parent=HbmRNA00207
contig0023	jigsaw-2	CDS	134137	134296	-26.5818	-	1	ID=Hbcds00207.2;Parent=HbmRNA00207
contig0023	jigsaw-2	CDS	134376	134447	-42.5	-	1	ID=Hbcds00207.3;Parent=HbmRNA00207
contig0023	jigsaw-2	CDS	134595	134713	-40.0217	-	0	ID=Hbcds00207.4;Parent=HbmRNA00207
contig0023	jigsaw-2	CDS	134788	134882	-39.6653	-	2	ID=Hbcds00207.5;Parent=HbmRNA00207
contig0023	jigsaw-2	CDS	134977	135043	-25.3571	-	0	ID=Hbcds00207.6;Parent=HbmRNA00207
contig0023	jigsaw-2	CDS	135105	135296	-39.7351	-	0	ID=Hbcds00207.7;Parent=HbmRNA00207
contig0023	jigsaw-2	CDS	135358	135477	-32.0796	-	0	ID=Hbcds00207.8;Parent=HbmRNA00207
contig0023	jigsaw-2	CDS	135540	135623	-34.5775	-	0	ID=Hbcds00207.9;Parent=HbmRNA00207
contig0023	jigsaw-2	CDS	135697	135870	-40.4766	-	0	ID=Hbcds00207.10;Parent=HbmRNA00207
contig0023	jigsaw-2	CDS	135978	136109	-34.375	-	0	ID=Hbcds00207.11;Parent=HbmRNA00207
contig0023	jigsaw-2	CDS	136168	136269	-34.6236	-	0	ID=Hbcds00207.12;Parent=HbmRNA00207
contig0023	jigsaw-2	CDS	136357	136509	-32.8863	-	0	ID=Hbcds00207.13;Parent=HbmRNA00207
contig0023	jigsaw-2	CDS	136701	136754	-20	-	0	ID=Hbcds00207.14;Parent=HbmRNA00207
contig0023	jigsaw-2	gene	11239	11313	.	+	.	ID=Hbgene00173;Name=Hbgene00173
contig0023	jigsaw-2	mRNA	11239	11313	.	+	.	ID=HbmRNA00173;Parent=Hbgene00173
contig0023	jigsaw-2	CDS	11239	11313	-4.86823	+	0	ID=Hbcds00173.1;Parent=HbmRNA00173
contig0023	jigsaw-2	gene	136995	137545	.	+	.	ID=Hbgene00208;Name=Hbgene00208
contig0023	jigsaw-2	mRNA	136995	137545	.	+	.	ID=HbmRNA00208;Parent=Hbgene00208
contig0023	jigsaw-2	CDS	136995	137047	0	+	0	ID=Hbcds00208.1;Parent=HbmRNA00208
contig0023	jigsaw-2	CDS	137338	137455	2.33333	+	1	ID=Hbcds00208.2;Parent=HbmRNA00208
contig0023	jigsaw-2	CDS	137510	137545	0	+	0	ID=Hbcds00208.3;Parent=HbmRNA00208
contig0023	jigsaw-2	gene	137598	138077	.	+	.	ID=Hbgene00209;Name=Hbgene00209
contig0023	jigsaw-2	mRNA	137598	138077	.	+	.	ID=HbmRNA00209;Parent=Hbgene00209
contig0023	jigsaw-2	CDS	137598	137755	0	+	0	ID=Hbcds00209.1;Parent=HbmRNA00209
contig0023	jigsaw-2	CDS	137948	138077	0	+	1	ID=Hbcds00209.2;Parent=HbmRNA00209
contig0023	jigsaw-2	gene	140103	143384	.	+	.	ID=Hbgene00210;Name=Hbgene00210
contig0023	jigsaw-2	mRNA	140103	143384	.	+	.	ID=HbmRNA00210;Parent=Hbgene00210
contig0023	jigsaw-2	CDS	140103	140300	-31	+	0	ID=Hbcds00210.1;Parent=HbmRNA00210
contig0023	jigsaw-2	CDS	140533	140664	-28	+	0	ID=Hbcds00210.2;Parent=HbmRNA00210
contig0023	jigsaw-2	CDS	141436	141518	-29	+	0	ID=Hbcds00210.3;Parent=HbmRNA00210
contig0023	jigsaw-2	CDS	141848	141957	-47.3788	+	1	ID=Hbcds00210.4;Parent=HbmRNA00210
contig0023	jigsaw-2	CDS	143140	143384	2.83692	+	2	ID=Hbcds00210.5;Parent=HbmRNA00210
contig0023	jigsaw-2	gene	148546	149850	.	+	.	ID=Hbgene00211;Name=Hbgene00211
contig0023	jigsaw-2	mRNA	148546	149850	.	+	.	ID=HbmRNA00211;Parent=Hbgene00211
contig0023	jigsaw-2	CDS	148546	148609	-30.3696	+	0	ID=Hbcds00211.1;Parent=HbmRNA00211
contig0023	jigsaw-2	CDS	148741	148838	-45.4375	+	2	ID=Hbcds00211.2;Parent=HbmRNA00211
contig0023	jigsaw-2	CDS	148928	149098	-28	+	0	ID=Hbcds00211.3;Parent=HbmRNA00211
contig0023	jigsaw-2	CDS	149372	149589	-19.5	+	0	ID=Hbcds00211.4;Parent=HbmRNA00211
contig0023	jigsaw-2	CDS	149691	149850	-4.125	+	1	ID=Hbcds00211.5;Parent=HbmRNA00211
contig0023	jigsaw-2	gene	154590	155912	.	+	.	ID=Hbgene00212;Name=Hbgene00212
contig0023	jigsaw-2	mRNA	154590	155912	.	+	.	ID=HbmRNA00212;Parent=Hbgene00212
contig0023	jigsaw-2	CDS	154590	154596	-31	+	0	ID=Hbcds00212.1;Parent=HbmRNA00212
contig0023	jigsaw-2	CDS	154883	155025	-28	+	2	ID=Hbcds00212.2;Parent=HbmRNA00212
contig0023	jigsaw-2	CDS	155124	155215	-28	+	0	ID=Hbcds00212.3;Parent=HbmRNA00212
contig0023	jigsaw-2	CDS	155306	155636	-23.5032	+	1	ID=Hbcds00212.4;Parent=HbmRNA00212
contig0023	jigsaw-2	CDS	155734	155811	-28	+	0	ID=Hbcds00212.5;Parent=HbmRNA00212
contig0023	jigsaw-2	CDS	155892	155912	1.5	+	0	ID=Hbcds00212.6;Parent=HbmRNA00212
contig0023	jigsaw-2	gene	156382	159975	.	+	.	ID=Hbgene00213;Name=Hbgene00213
contig0023	jigsaw-2	mRNA	156382	159975	.	+	.	ID=HbmRNA00213;Parent=Hbgene00213
contig0023	jigsaw-2	CDS	156382	156585	10	+	0	ID=Hbcds00213.1;Parent=HbmRNA00213
contig0023	jigsaw-2	CDS	156713	156719	-24.6842	+	0	ID=Hbcds00213.2;Parent=HbmRNA00213
contig0023	jigsaw-2	CDS	158175	158336	-19.588	+	2	ID=Hbcds00213.3;Parent=HbmRNA00213
contig0023	jigsaw-2	CDS	158403	158496	-47.5	+	2	ID=Hbcds00213.4;Parent=HbmRNA00213
contig0023	jigsaw-2	CDS	158589	158700	-43.6667	+	1	ID=Hbcds00213.5;Parent=HbmRNA00213
contig0023	jigsaw-2	CDS	158765	158845	-27	+	0	ID=Hbcds00213.6;Parent=HbmRNA00213
contig0023	jigsaw-2	CDS	158943	158951	-28.8667	+	0	ID=Hbcds00213.7;Parent=HbmRNA00213
contig0023	jigsaw-2	CDS	159451	159479	-46.9242	+	0	ID=Hbcds00213.8;Parent=HbmRNA00213
contig0023	jigsaw-2	CDS	159891	159975	1.33333	+	1	ID=Hbcds00213.9;Parent=HbmRNA00213
contig0023	jigsaw-2	gene	160467	160999	.	+	.	ID=Hbgene00214;Name=Hbgene00214
contig0023	jigsaw-2	mRNA	160467	160999	.	+	.	ID=HbmRNA00214;Parent=Hbgene00214
contig0023	jigsaw-2	CDS	160467	160803	-10.8333	+	0	ID=Hbcds00214.1;Parent=HbmRNA00214
contig0023	jigsaw-2	CDS	160974	160999	0	+	2	ID=Hbcds00214.2;Parent=HbmRNA00214
contig0023	jigsaw-2	gene	161387	161578	.	+	.	ID=Hbgene00215;Name=Hbgene00215
contig0023	jigsaw-2	mRNA	161387	161578	.	+	.	ID=HbmRNA00215;Parent=Hbgene00215
contig0023	jigsaw-2	CDS	161387	161578	0	+	0	ID=Hbcds00215.1;Parent=HbmRNA00215
contig0023	jigsaw-2	gene	162232	165100	.	+	.	ID=Hbgene00216;Name=Hbgene00216
contig0023	jigsaw-2	mRNA	162232	165100	.	+	.	ID=HbmRNA00216;Parent=Hbgene00216
contig0023	jigsaw-2	CDS	162232	162310	-30	+	0	ID=Hbcds00216.1;Parent=HbmRNA00216
contig0023	jigsaw-2	CDS	163865	163881	-29.9859	+	2	ID=Hbcds00216.2;Parent=HbmRNA00216
contig0023	jigsaw-2	CDS	164007	164012	-25.9869	+	0	ID=Hbcds00216.3;Parent=HbmRNA00216
contig0023	jigsaw-2	CDS	165071	165100	0	+	0	ID=Hbcds00216.4;Parent=HbmRNA00216
contig0023	jigsaw-2	gene	166922	167260	.	+	.	ID=Hbgene00217;Name=Hbgene00217
contig0023	jigsaw-2	mRNA	166922	167260	.	+	.	ID=HbmRNA00217;Parent=Hbgene00217
contig0023	jigsaw-2	CDS	166922	167045	1.65859	+	0	ID=Hbcds00217.1;Parent=HbmRNA00217
contig0023	jigsaw-2	CDS	167145	167260	-9.98979	+	2	ID=Hbcds00217.2;Parent=HbmRNA00217
contig0023	jigsaw-2	gene	11435	12910	.	+	.	ID=Hbgene00174;Name=Hbgene00174
contig0023	jigsaw-2	mRNA	11435	12910	.	+	.	ID=HbmRNA00174;Parent=Hbgene00174
contig0023	jigsaw-2	CDS	11435	11526	-19.9771	+	0	ID=Hbcds00174.1;Parent=HbmRNA00174
contig0023	jigsaw-2	CDS	11670	11817	-29.6087	+	1	ID=Hbcds00174.2;Parent=HbmRNA00174
contig0023	jigsaw-2	CDS	11961	12050	-47.3621	+	0	ID=Hbcds00174.3;Parent=HbmRNA00174
contig0023	jigsaw-2	CDS	12490	12679	-18.4853	+	0	ID=Hbcds00174.4;Parent=HbmRNA00174
contig0023	jigsaw-2	CDS	12885	12910	-27.4483	+	2	ID=Hbcds00174.5;Parent=HbmRNA00174
contig0023	jigsaw-2	gene	169421	169850	.	-	.	ID=Hbgene00218;Name=Hbgene00218
contig0023	jigsaw-2	mRNA	169421	169850	.	-	.	ID=HbmRNA00218;Parent=Hbgene00218
contig0023	jigsaw-2	CDS	169421	169513	1.5	-	0	ID=Hbcds00218.1;Parent=HbmRNA00218
contig0023	jigsaw-2	CDS	169615	169733	-37.3183	-	2	ID=Hbcds00218.2;Parent=HbmRNA00218
contig0023	jigsaw-2	CDS	169799	169850	-30.0417	-	0	ID=Hbcds00218.3;Parent=HbmRNA00218
contig0023	jigsaw-2	gene	170261	172734	.	-	.	ID=Hbgene00219;Name=Hbgene00219
contig0023	jigsaw-2	mRNA	170261	172734	.	-	.	ID=HbmRNA00219;Parent=Hbgene00219
contig0023	jigsaw-2	CDS	170261	170506	15.0169	-	0	ID=Hbcds00219.1;Parent=HbmRNA00219
contig0023	jigsaw-2	CDS	170577	170723	-37.6792	-	0	ID=Hbcds00219.2;Parent=HbmRNA00219
contig0023	jigsaw-2	CDS	170782	170802	22.6667	-	0	ID=Hbcds00219.3;Parent=HbmRNA00219
contig0023	jigsaw-2	CDS	170854	170962	-27.3684	-	1	ID=Hbcds00219.4;Parent=HbmRNA00219
contig0023	jigsaw-2	CDS	171247	171414	-27.7281	-	1	ID=Hbcds00219.5;Parent=HbmRNA00219
contig0023	jigsaw-2	CDS	171548	171687	-35.25	-	0	ID=Hbcds00219.6;Parent=HbmRNA00219
contig0023	jigsaw-2	CDS	171808	171876	-38.3384	-	0	ID=Hbcds00219.7;Parent=HbmRNA00219
contig0023	jigsaw-2	CDS	171936	172020	-38.3333	-	1	ID=Hbcds00219.8;Parent=HbmRNA00219
contig0023	jigsaw-2	CDS	172158	172333	-37.3651	-	0	ID=Hbcds00219.9;Parent=HbmRNA00219
contig0023	jigsaw-2	CDS	172418	172570	-26.2747	-	0	ID=Hbcds00219.10;Parent=HbmRNA00219
contig0023	jigsaw-2	CDS	172648	172734	-6.57896	-	0	ID=Hbcds00219.11;Parent=HbmRNA00219
contig0023	jigsaw-2	gene	175568	176319	.	-	.	ID=Hbgene00220;Name=Hbgene00220
contig0023	jigsaw-2	mRNA	175568	176319	.	-	.	ID=HbmRNA00220;Parent=Hbgene00220
contig0023	jigsaw-2	CDS	175568	175663	-25.6036	-	0	ID=Hbcds00220.1;Parent=HbmRNA00220
contig0023	jigsaw-2	CDS	176206	176319	2.63793	-	0	ID=Hbcds00220.2;Parent=HbmRNA00220
contig0023	jigsaw-2	gene	13093	15942	.	+	.	ID=Hbgene00175;Name=Hbgene00175
contig0023	jigsaw-2	mRNA	13093	15942	.	+	.	ID=HbmRNA00175;Parent=Hbgene00175
contig0023	jigsaw-2	CDS	13093	13255	-1.63224	+	0	ID=Hbcds00175.1;Parent=HbmRNA00175
contig0023	jigsaw-2	CDS	13735	13848	0	+	2	ID=Hbcds00175.2;Parent=HbmRNA00175
contig0023	jigsaw-2	CDS	14602	14723	-36.2825	+	2	ID=Hbcds00175.3;Parent=HbmRNA00175
contig0023	jigsaw-2	CDS	15088	15430	-38.6765	+	0	ID=Hbcds00175.4;Parent=HbmRNA00175
contig0023	jigsaw-2	CDS	15797	15942	1.33333	+	2	ID=Hbcds00175.5;Parent=HbmRNA00175
contig0023	jigsaw-2	gene	16448	18550	.	+	.	ID=Hbgene00176;Name=Hbgene00176
contig0023	jigsaw-2	mRNA	16448	18550	.	+	.	ID=HbmRNA00176;Parent=Hbgene00176
contig0023	jigsaw-2	CDS	16448	16507	-31	+	0	ID=Hbcds00176.1;Parent=HbmRNA00176
contig0023	jigsaw-2	CDS	17005	17178	-29.6667	+	0	ID=Hbcds00176.2;Parent=HbmRNA00176
contig0023	jigsaw-2	CDS	18521	18550	-11.9	+	0	ID=Hbcds00176.3;Parent=HbmRNA00176
contig0023	jigsaw-2	gene	18614	22083	.	+	.	ID=Hbgene00177;Name=Hbgene00177
contig0023	jigsaw-2	mRNA	18614	22083	.	+	.	ID=HbmRNA00177;Parent=Hbgene00177
contig0023	jigsaw-2	CDS	18614	18621	-31	+	0	ID=Hbcds00177.1;Parent=HbmRNA00177
contig0023	jigsaw-2	CDS	19172	19306	-26	+	1	ID=Hbcds00177.2;Parent=HbmRNA00177
contig0023	jigsaw-2	CDS	19363	19462	-47.5	+	1	ID=Hbcds00177.3;Parent=HbmRNA00177
contig0023	jigsaw-2	CDS	19752	19840	-26	+	0	ID=Hbcds00177.4;Parent=HbmRNA00177
contig0023	jigsaw-2	CDS	20671	20859	-28.5	+	1	ID=Hbcds00177.5;Parent=HbmRNA00177
contig0023	jigsaw-2	CDS	20912	21005	-38.6267	+	1	ID=Hbcds00177.6;Parent=HbmRNA00177
contig0023	jigsaw-2	CDS	21079	21177	0	+	0	ID=Hbcds00177.7;Parent=HbmRNA00177
contig0023	jigsaw-2	CDS	21320	21445	0	+	0	ID=Hbcds00177.8;Parent=HbmRNA00177
contig0023	jigsaw-2	CDS	22048	22083	0	+	0	ID=Hbcds00177.9;Parent=HbmRNA00177
contig0023	jigsaw-2	gene	22385	24024	.	+	.	ID=Hbgene00178;Name=Hbgene00178
contig0023	jigsaw-2	mRNA	22385	24024	.	+	.	ID=HbmRNA00178;Parent=Hbgene00178
contig0023	jigsaw-2	CDS	22385	22408	-31	+	0	ID=Hbcds00178.1;Parent=HbmRNA00178
contig0023	jigsaw-2	CDS	23271	23333	-42.8182	+	0	ID=Hbcds00178.2;Parent=HbmRNA00178
contig0023	jigsaw-2	CDS	23404	23667	-37.8627	+	0	ID=Hbcds00178.3;Parent=HbmRNA00178
contig0023	jigsaw-2	CDS	23881	24024	0	+	0	ID=Hbcds00178.4;Parent=HbmRNA00178
contig0024	jigsaw-2	gene	16060	16494	.	+	.	ID=Hbgene00227;Name=Hbgene00227
contig0024	jigsaw-2	mRNA	16060	16494	.	+	.	ID=HbmRNA00227;Parent=Hbgene00227
contig0024	jigsaw-2	CDS	16060	16100	-4.37753	+	0	ID=Hbcds00227.1;Parent=HbmRNA00227
contig0024	jigsaw-2	CDS	16461	16494	-0.465858	+	1	ID=Hbcds00227.2;Parent=HbmRNA00227
contig0024	jigsaw-2	gene	16605	16784	.	-	.	ID=Hbgene00228;Name=Hbgene00228
contig0024	jigsaw-2	mRNA	16605	16784	.	-	.	ID=HbmRNA00228;Parent=Hbgene00228
contig0024	jigsaw-2	CDS	16605	16784	29.4846	-	0	ID=Hbcds00228.1;Parent=HbmRNA00228
contig0024	jigsaw-2	gene	16844	17512	.	+	.	ID=Hbgene00229;Name=Hbgene00229
contig0024	jigsaw-2	mRNA	16844	17512	.	+	.	ID=HbmRNA00229;Parent=Hbgene00229
contig0024	jigsaw-2	CDS	16844	16876	-11.3909	+	0	ID=Hbcds00229.1;Parent=HbmRNA00229
contig0024	jigsaw-2	CDS	16921	16929	-35.9971	+	0	ID=Hbcds00229.2;Parent=HbmRNA00229
contig0024	jigsaw-2	CDS	17174	17198	-34.4662	+	0	ID=Hbcds00229.3;Parent=HbmRNA00229
contig0024	jigsaw-2	CDS	17293	17481	-32.2529	+	2	ID=Hbcds00229.4;Parent=HbmRNA00229
contig0024	jigsaw-2	CDS	17493	17512	-10.1719	+	2	ID=Hbcds00229.5;Parent=HbmRNA00229
contig0024	jigsaw-2	gene	18338	20191	.	+	.	ID=Hbgene00230;Name=Hbgene00230
contig0024	jigsaw-2	mRNA	18338	20191	.	+	.	ID=HbmRNA00230;Parent=Hbgene00230
contig0024	jigsaw-2	CDS	18338	18347	-31.2195	+	0	ID=Hbcds00230.1;Parent=HbmRNA00230
contig0024	jigsaw-2	CDS	18539	18603	-31.9302	+	2	ID=Hbcds00230.2;Parent=HbmRNA00230
contig0024	jigsaw-2	CDS	18674	18678	-34.5415	+	0	ID=Hbcds00230.3;Parent=HbmRNA00230
contig0024	jigsaw-2	CDS	19609	19622	-45.4258	+	1	ID=Hbcds00230.4;Parent=HbmRNA00230
contig0024	jigsaw-2	CDS	20022	20029	-25.2917	+	2	ID=Hbcds00230.5;Parent=HbmRNA00230
contig0024	jigsaw-2	CDS	20093	20098	0	+	0	ID=Hbcds00230.6;Parent=HbmRNA00230
contig0024	jigsaw-2	CDS	20126	20155	-38.7944	+	0	ID=Hbcds00230.7;Parent=HbmRNA00230
contig0024	jigsaw-2	CDS	20186	20191	-13.8476	+	0	ID=Hbcds00230.8;Parent=HbmRNA00230
contig0024	jigsaw-2	gene	20783	21595	.	+	.	ID=Hbgene00231;Name=Hbgene00231
contig0024	jigsaw-2	mRNA	20783	21595	.	+	.	ID=HbmRNA00231;Parent=Hbgene00231
contig0024	jigsaw-2	CDS	20783	21281	0.401212	+	0	ID=Hbcds00231.1;Parent=HbmRNA00231
contig0024	jigsaw-2	CDS	21327	21474	-28	+	2	ID=Hbcds00231.2;Parent=HbmRNA00231
contig0024	jigsaw-2	CDS	21532	21595	10.3333	+	1	ID=Hbcds00231.3;Parent=HbmRNA00231
contig0024	jigsaw-2	gene	22042	23123	.	+	.	ID=Hbgene00232;Name=Hbgene00232
contig0024	jigsaw-2	mRNA	22042	23123	.	+	.	ID=HbmRNA00232;Parent=Hbgene00232
contig0024	jigsaw-2	CDS	22042	22050	-31.96	+	0	ID=Hbcds00232.1;Parent=HbmRNA00232
contig0024	jigsaw-2	CDS	22064	22078	-26.76	+	0	ID=Hbcds00232.2;Parent=HbmRNA00232
contig0024	jigsaw-2	CDS	22112	22167	-16.8251	+	0	ID=Hbcds00232.3;Parent=HbmRNA00232
contig0024	jigsaw-2	CDS	23015	23123	1.21443	+	1	ID=Hbcds00232.4;Parent=HbmRNA00232
contig0024	jigsaw-2	gene	23178	23869	.	-	.	ID=Hbgene00233;Name=Hbgene00233
contig0024	jigsaw-2	mRNA	23178	23869	.	-	.	ID=HbmRNA00233;Parent=Hbgene00233
contig0024	jigsaw-2	CDS	23178	23284	0	-	2	ID=Hbcds00233.1;Parent=HbmRNA00233
contig0024	jigsaw-2	CDS	23402	23507	32.5363	-	0	ID=Hbcds00233.2;Parent=HbmRNA00233
contig0024	jigsaw-2	CDS	23660	23671	-40.0625	-	0	ID=Hbcds00233.3;Parent=HbmRNA00233
contig0024	jigsaw-2	CDS	23759	23869	27.2127	-	0	ID=Hbcds00233.4;Parent=HbmRNA00233
contig0024	jigsaw-2	gene	819	1316	.	-	.	ID=Hbgene00221;Name=Hbgene00221
contig0024	jigsaw-2	mRNA	819	1316	.	-	.	ID=HbmRNA00221;Parent=Hbgene00221
contig0024	jigsaw-2	CDS	819	1026	-1.38462	-	1	ID=Hbcds00221.1;Parent=HbmRNA00221
contig0024	jigsaw-2	CDS	1192	1316	-6.81673	-	0	ID=Hbcds00221.2;Parent=HbmRNA00221
contig0024	jigsaw-2	gene	7625	10418	.	+	.	ID=Hbgene00222;Name=Hbgene00222
contig0024	jigsaw-2	mRNA	7625	10418	.	+	.	ID=HbmRNA00222;Parent=Hbgene00222
contig0024	jigsaw-2	CDS	7625	7688	16.6429	+	0	ID=Hbcds00222.1;Parent=HbmRNA00222
contig0024	jigsaw-2	CDS	7886	8123	11.4158	+	2	ID=Hbcds00222.2;Parent=HbmRNA00222
contig0024	jigsaw-2	CDS	8363	8383	30.625	+	1	ID=Hbcds00222.3;Parent=HbmRNA00222
contig0024	jigsaw-2	CDS	8556	8596	17.1384	+	1	ID=Hbcds00222.4;Parent=HbmRNA00222
contig0024	jigsaw-2	CDS	9963	10032	-28.6687	+	2	ID=Hbcds00222.5;Parent=HbmRNA00222
contig0024	jigsaw-2	CDS	10322	10418	0.786841	+	1	ID=Hbcds00222.6;Parent=HbmRNA00222
contig0024	jigsaw-2	gene	11660	12094	.	-	.	ID=Hbgene00223;Name=Hbgene00223
contig0024	jigsaw-2	mRNA	11660	12094	.	-	.	ID=HbmRNA00223;Parent=Hbgene00223
contig0024	jigsaw-2	CDS	11660	11787	31.1003	-	2	ID=Hbcds00223.1;Parent=HbmRNA00223
contig0024	jigsaw-2	CDS	12001	12094	29.6602	-	0	ID=Hbcds00223.2;Parent=HbmRNA00223
contig0024	jigsaw-2	gene	12305	12987	.	+	.	ID=Hbgene00224;Name=Hbgene00224
contig0024	jigsaw-2	mRNA	12305	12987	.	+	.	ID=HbmRNA00224;Parent=Hbgene00224
contig0024	jigsaw-2	CDS	12305	12309	0	+	0	ID=Hbcds00224.1;Parent=HbmRNA00224
contig0024	jigsaw-2	CDS	12602	12702	7.76923	+	1	ID=Hbcds00224.2;Parent=HbmRNA00224
contig0024	jigsaw-2	CDS	12758	12987	1.67559	+	2	ID=Hbcds00224.3;Parent=HbmRNA00224
contig0024	jigsaw-2	gene	13167	13732	.	-	.	ID=Hbgene00225;Name=Hbgene00225
contig0024	jigsaw-2	mRNA	13167	13732	.	-	.	ID=HbmRNA00225;Parent=Hbgene00225
contig0024	jigsaw-2	CDS	13167	13228	32.2768	-	2	ID=Hbcds00225.1;Parent=HbmRNA00225
contig0024	jigsaw-2	CDS	13425	13502	-5.33333	-	2	ID=Hbcds00225.2;Parent=HbmRNA00225
contig0024	jigsaw-2	CDS	13588	13732	12.6927	-	0	ID=Hbcds00225.3;Parent=HbmRNA00225
contig0024	jigsaw-2	gene	13815	15587	.	+	.	ID=Hbgene00226;Name=Hbgene00226
contig0024	jigsaw-2	mRNA	13815	15587	.	+	.	ID=HbmRNA00226;Parent=Hbgene00226
contig0024	jigsaw-2	CDS	13815	13829	-32	+	0	ID=Hbcds00226.1;Parent=HbmRNA00226
contig0024	jigsaw-2	CDS	14136	14141	-36.0004	+	0	ID=Hbcds00226.2;Parent=HbmRNA00226
contig0024	jigsaw-2	CDS	14495	14569	-36.8334	+	0	ID=Hbcds00226.3;Parent=HbmRNA00226
contig0024	jigsaw-2	CDS	14585	14598	-36.5079	+	0	ID=Hbcds00226.4;Parent=HbmRNA00226
contig0024	jigsaw-2	CDS	14720	14724	-35.9353	+	1	ID=Hbcds00226.5;Parent=HbmRNA00226
contig0024	jigsaw-2	CDS	14811	14824	0	+	2	ID=Hbcds00226.6;Parent=HbmRNA00226
contig0024	jigsaw-2	CDS	15043	15052	-45.5805	+	0	ID=Hbcds00226.7;Parent=HbmRNA00226
contig0024	jigsaw-2	CDS	15544	15587	-1.46296	+	2	ID=Hbcds00226.8;Parent=HbmRNA00226
contig0025	jigsaw-2	gene	10108	11160	.	+	.	ID=Hbgene00241;Name=Hbgene00241
contig0025	jigsaw-2	mRNA	10108	11160	.	+	.	ID=HbmRNA00241;Parent=Hbgene00241
contig0025	jigsaw-2	CDS	10108	10285	11.5615	+	0	ID=Hbcds00241.1;Parent=HbmRNA00241
contig0025	jigsaw-2	CDS	10359	10379	29.1667	+	2	ID=Hbcds00241.2;Parent=HbmRNA00241
contig0025	jigsaw-2	CDS	10437	10450	-28.6625	+	2	ID=Hbcds00241.3;Parent=HbmRNA00241
contig0025	jigsaw-2	CDS	10537	10542	26.25	+	0	ID=Hbcds00241.4;Parent=HbmRNA00241
contig0025	jigsaw-2	CDS	10559	10581	24.2141	+	0	ID=Hbcds00241.5;Parent=HbmRNA00241
contig0025	jigsaw-2	CDS	10657	10690	-31.1042	+	1	ID=Hbcds00241.6;Parent=HbmRNA00241
contig0025	jigsaw-2	CDS	10717	10765	-1.43976	+	0	ID=Hbcds00241.7;Parent=HbmRNA00241
contig0025	jigsaw-2	CDS	10880	10952	17.2865	+	2	ID=Hbcds00241.8;Parent=HbmRNA00241
contig0025	jigsaw-2	CDS	10973	11013	-33.574	+	1	ID=Hbcds00241.9;Parent=HbmRNA00241
contig0025	jigsaw-2	CDS	11064	11101	-33.1419	+	2	ID=Hbcds00241.10;Parent=HbmRNA00241
contig0025	jigsaw-2	CDS	11119	11160	-2.78345	+	0	ID=Hbcds00241.11;Parent=HbmRNA00241
contig0025	jigsaw-2	gene	11393	11545	.	-	.	ID=Hbgene00242;Name=Hbgene00242
contig0025	jigsaw-2	mRNA	11393	11545	.	-	.	ID=HbmRNA00242;Parent=Hbgene00242
contig0025	jigsaw-2	CDS	11393	11545	30.8403	-	0	ID=Hbcds00242.1;Parent=HbmRNA00242
contig0025	jigsaw-2	gene	11904	12880	.	-	.	ID=Hbgene00243;Name=Hbgene00243
contig0025	jigsaw-2	mRNA	11904	12880	.	-	.	ID=HbmRNA00243;Parent=Hbgene00243
contig0025	jigsaw-2	CDS	11904	12017	32.9493	-	0	ID=Hbcds00243.1;Parent=HbmRNA00243
contig0025	jigsaw-2	CDS	12297	12359	32.0261	-	0	ID=Hbcds00243.2;Parent=HbmRNA00243
contig0025	jigsaw-2	CDS	12411	12502	30.8702	-	2	ID=Hbcds00243.3;Parent=HbmRNA00243
contig0025	jigsaw-2	CDS	12688	12708	-27.6071	-	2	ID=Hbcds00243.4;Parent=HbmRNA00243
contig0025	jigsaw-2	CDS	12751	12880	17.5733	-	0	ID=Hbcds00243.5;Parent=HbmRNA00243
contig0025	jigsaw-2	gene	15518	15692	.	+	.	ID=Hbgene00244;Name=Hbgene00244
contig0025	jigsaw-2	mRNA	15518	15692	.	+	.	ID=HbmRNA00244;Parent=Hbgene00244
contig0025	jigsaw-2	CDS	15518	15521	-32.5584	+	0	ID=Hbcds00244.1;Parent=HbmRNA00244
contig0025	jigsaw-2	CDS	15613	15692	1.68843	+	2	ID=Hbcds00244.2;Parent=HbmRNA00244
contig0025	jigsaw-2	gene	423	924	.	-	.	ID=Hbgene00234;Name=Hbgene00234
contig0025	jigsaw-2	mRNA	423	924	.	-	.	ID=HbmRNA00234;Parent=Hbgene00234
contig0025	jigsaw-2	CDS	423	539	30.7222	-	0	ID=Hbcds00234.1;Parent=HbmRNA00234
contig0025	jigsaw-2	CDS	623	685	29.3472	-	0	ID=Hbcds00234.2;Parent=HbmRNA00234
contig0025	jigsaw-2	CDS	856	924	30.265	-	0	ID=Hbcds00234.3;Parent=HbmRNA00234
contig0025	jigsaw-2	gene	958	2023	.	+	.	ID=Hbgene00235;Name=Hbgene00235
contig0025	jigsaw-2	mRNA	958	2023	.	+	.	ID=HbmRNA00235;Parent=Hbgene00235
contig0025	jigsaw-2	CDS	958	1025	-2.98226	+	0	ID=Hbcds00235.1;Parent=HbmRNA00235
contig0025	jigsaw-2	CDS	1130	1170	-34.1292	+	1	ID=Hbcds00235.2;Parent=HbmRNA00235
contig0025	jigsaw-2	CDS	1328	1339	-32.1728	+	2	ID=Hbcds00235.3;Parent=HbmRNA00235
contig0025	jigsaw-2	CDS	1353	1379	-32.1531	+	2	ID=Hbcds00235.4;Parent=HbmRNA00235
contig0025	jigsaw-2	CDS	1480	1484	0	+	2	ID=Hbcds00235.5;Parent=HbmRNA00235
contig0025	jigsaw-2	CDS	1512	1517	-43.2075	+	0	ID=Hbcds00235.6;Parent=HbmRNA00235
contig0025	jigsaw-2	CDS	1626	1709	-33.7068	+	0	ID=Hbcds00235.7;Parent=HbmRNA00235
contig0025	jigsaw-2	CDS	1836	1844	-45.6588	+	0	ID=Hbcds00235.8;Parent=HbmRNA00235
contig0025	jigsaw-2	CDS	1997	2023	-8.86032	+	0	ID=Hbcds00235.9;Parent=HbmRNA00235
contig0025	jigsaw-2	gene	2067	5504	.	+	.	ID=Hbgene00236;Name=Hbgene00236
contig0025	jigsaw-2	mRNA	2067	5504	.	+	.	ID=HbmRNA00236;Parent=Hbgene00236
contig0025	jigsaw-2	CDS	2067	2080	-23.5406	+	0	ID=Hbcds00236.1;Parent=HbmRNA00236
contig0025	jigsaw-2	CDS	2166	2168	-26.7833	+	1	ID=Hbcds00236.2;Parent=HbmRNA00236
contig0025	jigsaw-2	CDS	2804	2810	-35.7222	+	1	ID=Hbcds00236.3;Parent=HbmRNA00236
contig0025	jigsaw-2	CDS	3117	3119	-27.8868	+	0	ID=Hbcds00236.4;Parent=HbmRNA00236
contig0025	jigsaw-2	CDS	3318	3341	-36.909	+	0	ID=Hbcds00236.5;Parent=HbmRNA00236
contig0025	jigsaw-2	CDS	3352	3352	-26.8794	+	0	ID=Hbcds00236.6;Parent=HbmRNA00236
contig0025	jigsaw-2	CDS	3505	3526	-37.6022	+	2	ID=Hbcds00236.7;Parent=HbmRNA00236
contig0025	jigsaw-2	CDS	3842	3842	-27.0686	+	1	ID=Hbcds00236.8;Parent=HbmRNA00236
contig0025	jigsaw-2	CDS	3909	3913	0	+	0	ID=Hbcds00236.9;Parent=HbmRNA00236
contig0025	jigsaw-2	CDS	4206	4234	-35.1961	+	1	ID=Hbcds00236.10;Parent=HbmRNA00236
contig0025	jigsaw-2	CDS	4436	4513	-33.3843	+	2	ID=Hbcds00236.11;Parent=HbmRNA00236
contig0025	jigsaw-2	CDS	4903	4922	-30.236	+	2	ID=Hbcds00236.12;Parent=HbmRNA00236
contig0025	jigsaw-2	CDS	5008	5029	-31.2842	+	0	ID=Hbcds00236.13;Parent=HbmRNA00236
contig0025	jigsaw-2	CDS	5347	5396	-29.4873	+	2	ID=Hbcds00236.14;Parent=HbmRNA00236
contig0025	jigsaw-2	CDS	5478	5504	-3.86574	+	0	ID=Hbcds00236.15;Parent=HbmRNA00236
contig0025	jigsaw-2	gene	5613	6351	.	+	.	ID=Hbgene00237;Name=Hbgene00237
contig0025	jigsaw-2	mRNA	5613	6351	.	+	.	ID=HbmRNA00237;Parent=Hbgene00237
contig0025	jigsaw-2	CDS	5613	5677	-3.04759	+	0	ID=Hbcds00237.1;Parent=HbmRNA00237
contig0025	jigsaw-2	CDS	6282	6351	27.2675	+	1	ID=Hbcds00237.2;Parent=HbmRNA00237
contig0025	jigsaw-2	gene	6418	7880	.	-	.	ID=Hbgene00238;Name=Hbgene00238
contig0025	jigsaw-2	mRNA	6418	7880	.	-	.	ID=HbmRNA00238;Parent=Hbgene00238
contig0025	jigsaw-2	CDS	6418	6431	-14.3333	-	2	ID=Hbcds00238.1;Parent=HbmRNA00238
contig0025	jigsaw-2	CDS	6546	6618	32.2182	-	0	ID=Hbcds00238.2;Parent=HbmRNA00238
contig0025	jigsaw-2	CDS	6804	6817	30.0432	-	2	ID=Hbcds00238.3;Parent=HbmRNA00238
contig0025	jigsaw-2	CDS	7121	7144	29.8766	-	2	ID=Hbcds00238.4;Parent=HbmRNA00238
contig0025	jigsaw-2	CDS	7155	7216	32.8212	-	1	ID=Hbcds00238.5;Parent=HbmRNA00238
contig0025	jigsaw-2	CDS	7332	7534	34.1307	-	0	ID=Hbcds00238.6;Parent=HbmRNA00238
contig0025	jigsaw-2	CDS	7606	7635	30.0055	-	0	ID=Hbcds00238.7;Parent=HbmRNA00238
contig0025	jigsaw-2	CDS	7869	7880	22.4065	-	0	ID=Hbcds00238.8;Parent=HbmRNA00238
contig0025	jigsaw-2	gene	8070	8617	.	+	.	ID=Hbgene00239;Name=Hbgene00239
contig0025	jigsaw-2	mRNA	8070	8617	.	+	.	ID=HbmRNA00239;Parent=Hbgene00239
contig0025	jigsaw-2	CDS	8070	8172	8.30614	+	0	ID=Hbcds00239.1;Parent=HbmRNA00239
contig0025	jigsaw-2	CDS	8402	8439	-13	+	2	ID=Hbcds00239.2;Parent=HbmRNA00239
contig0025	jigsaw-2	CDS	8495	8617	9.33343	+	0	ID=Hbcds00239.3;Parent=HbmRNA00239
contig0025	jigsaw-2	gene	8638	9692	.	+	.	ID=Hbgene00240;Name=Hbgene00240
contig0025	jigsaw-2	mRNA	8638	9692	.	+	.	ID=HbmRNA00240;Parent=Hbgene00240
contig0025	jigsaw-2	CDS	8638	8787	18.3204	+	0	ID=Hbcds00240.1;Parent=HbmRNA00240
contig0025	jigsaw-2	CDS	8846	8857	-27.7111	+	0	ID=Hbcds00240.2;Parent=HbmRNA00240
contig0025	jigsaw-2	CDS	9057	9124	24.7522	+	0	ID=Hbcds00240.3;Parent=HbmRNA00240
contig0025	jigsaw-2	CDS	9146	9238	18.5934	+	1	ID=Hbcds00240.4;Parent=HbmRNA00240
contig0025	jigsaw-2	CDS	9274	9339	6.47664	+	1	ID=Hbcds00240.5;Parent=HbmRNA00240
contig0025	jigsaw-2	CDS	9596	9692	21.0388	+	1	ID=Hbcds00240.6;Parent=HbmRNA00240
contig0026	jigsaw-2	gene	77	690	.	+	.	ID=Hbgene00245;Name=Hbgene00245
contig0026	jigsaw-2	mRNA	77	690	.	+	.	ID=HbmRNA00245;Parent=Hbgene00245
contig0026	jigsaw-2	CDS	77	199	2.1541	+	0	ID=Hbcds00245.1;Parent=HbmRNA00245
contig0026	jigsaw-2	CDS	228	400	-25.5373	+	0	ID=Hbcds00245.2;Parent=HbmRNA00245
contig0026	jigsaw-2	CDS	422	484	-25.4587	+	1	ID=Hbcds00245.3;Parent=HbmRNA00245
contig0026	jigsaw-2	CDS	513	531	-25.5743	+	1	ID=Hbcds00245.4;Parent=HbmRNA00245
contig0026	jigsaw-2	CDS	547	690	2.4037	+	0	ID=Hbcds00245.5;Parent=HbmRNA00245
contig0027	jigsaw-2	gene	54	397	.	+	.	ID=Hbgene00246;Name=Hbgene00246
contig0027	jigsaw-2	mRNA	54	397	.	+	.	ID=HbmRNA00246;Parent=Hbgene00246
contig0027	jigsaw-2	CDS	54	75	-29.6269	+	0	ID=Hbcds00246.1;Parent=HbmRNA00246
contig0027	jigsaw-2	CDS	97	362	-27.6898	+	2	ID=Hbcds00246.2;Parent=HbmRNA00246
contig0027	jigsaw-2	CDS	395	397	-14.9902	+	0	ID=Hbcds00246.3;Parent=HbmRNA00246
contig0027	jigsaw-2	gene	423	924	.	-	.	ID=Hbgene00247;Name=Hbgene00247
contig0027	jigsaw-2	mRNA	423	924	.	-	.	ID=HbmRNA00247;Parent=Hbgene00247
contig0027	jigsaw-2	CDS	423	506	32.5278	-	0	ID=Hbcds00247.1;Parent=HbmRNA00247
contig0027	jigsaw-2	CDS	538	539	0	-	2	ID=Hbcds00247.2;Parent=HbmRNA00247
contig0027	jigsaw-2	CDS	599	766	34.5679	-	2	ID=Hbcds00247.3;Parent=HbmRNA00247
contig0027	jigsaw-2	CDS	781	810	33.0578	-	2	ID=Hbcds00247.4;Parent=HbmRNA00247
contig0027	jigsaw-2	CDS	822	924	33.0766	-	0	ID=Hbcds00247.5;Parent=HbmRNA00247
contig0028	jigsaw-2	gene	158	363	.	-	.	ID=Hbgene00248;Name=Hbgene00248
contig0028	jigsaw-2	mRNA	158	363	.	-	.	ID=HbmRNA00248;Parent=Hbgene00248
contig0028	jigsaw-2	CDS	158	194	33.0557	-	1	ID=Hbcds00248.1;Parent=HbmRNA00248
contig0028	jigsaw-2	CDS	205	308	33.9645	-	0	ID=Hbcds00248.2;Parent=HbmRNA00248
contig0028	jigsaw-2	CDS	319	363	32.9827	-	0	ID=Hbcds00248.3;Parent=HbmRNA00248
contig0028	jigsaw-2	gene	424	1159	.	+	.	ID=Hbgene00249;Name=Hbgene00249
contig0028	jigsaw-2	mRNA	424	1159	.	+	.	ID=HbmRNA00249;Parent=Hbgene00249
contig0028	jigsaw-2	CDS	424	445	33.25	+	0	ID=Hbcds00249.1;Parent=HbmRNA00249
contig0028	jigsaw-2	CDS	480	623	28.7879	+	2	ID=Hbcds00249.2;Parent=HbmRNA00249
contig0028	jigsaw-2	CDS	638	646	31.1111	+	2	ID=Hbcds00249.3;Parent=HbmRNA00249
contig0028	jigsaw-2	CDS	657	705	34.2663	+	2	ID=Hbcds00249.4;Parent=HbmRNA00249
contig0028	jigsaw-2	CDS	717	824	34.6324	+	1	ID=Hbcds00249.5;Parent=HbmRNA00249
contig0028	jigsaw-2	CDS	852	938	34.5868	+	1	ID=Hbcds00249.6;Parent=HbmRNA00249
contig0028	jigsaw-2	CDS	953	991	22	+	1	ID=Hbcds00249.7;Parent=HbmRNA00249
contig0028	jigsaw-2	CDS	1008	1095	-27.9692	+	1	ID=Hbcds00249.8;Parent=HbmRNA00249
contig0028	jigsaw-2	CDS	1106	1159	33.7049	+	0	ID=Hbcds00249.9;Parent=HbmRNA00249
contig0029	jigsaw-2	gene	11418	11588	.	+	.	ID=Hbgene00257;Name=Hbgene00257
contig0029	jigsaw-2	mRNA	11418	11588	.	+	.	ID=HbmRNA00257;Parent=Hbgene00257
contig0029	jigsaw-2	CDS	11418	11588	1.15545	+	0	ID=Hbcds00257.1;Parent=HbmRNA00257
contig0029	jigsaw-2	gene	11663	12764	.	+	.	ID=Hbgene00258;Name=Hbgene00258
contig0029	jigsaw-2	mRNA	11663	12764	.	+	.	ID=HbmRNA00258;Parent=Hbgene00258
contig0029	jigsaw-2	CDS	11663	11676	28	+	0	ID=Hbcds00258.1;Parent=HbmRNA00258
contig0029	jigsaw-2	CDS	11787	11833	-0.287879	+	1	ID=Hbcds00258.2;Parent=HbmRNA00258
contig0029	jigsaw-2	CDS	12014	12072	22.14	+	2	ID=Hbcds00258.3;Parent=HbmRNA00258
contig0029	jigsaw-2	CDS	12205	12274	-4.10967	+	0	ID=Hbcds00258.4;Parent=HbmRNA00258
contig0029	jigsaw-2	CDS	12331	12389	18.0369	+	2	ID=Hbcds00258.5;Parent=HbmRNA00258
contig0029	jigsaw-2	CDS	12514	12526	-38.6629	+	0	ID=Hbcds00258.6;Parent=HbmRNA00258
contig0029	jigsaw-2	CDS	12609	12650	4.90776	+	2	ID=Hbcds00258.7;Parent=HbmRNA00258
contig0029	jigsaw-2	CDS	12670	12764	17.3189	+	2	ID=Hbcds00258.8;Parent=HbmRNA00258
contig0029	jigsaw-2	gene	2161	2717	.	+	.	ID=Hbgene00250;Name=Hbgene00250
contig0029	jigsaw-2	mRNA	2161	2717	.	+	.	ID=HbmRNA00250;Parent=Hbgene00250
contig0029	jigsaw-2	CDS	2161	2165	-33.3603	+	0	ID=Hbcds00250.1;Parent=HbmRNA00250
contig0029	jigsaw-2	CDS	2264	2646	-30.5468	+	1	ID=Hbcds00250.2;Parent=HbmRNA00250
contig0029	jigsaw-2	CDS	2660	2669	-35.1165	+	2	ID=Hbcds00250.3;Parent=HbmRNA00250
contig0029	jigsaw-2	CDS	2687	2717	32.8125	+	1	ID=Hbcds00250.4;Parent=HbmRNA00250
contig0029	jigsaw-2	gene	3280	3609	.	+	.	ID=Hbgene00251;Name=Hbgene00251
contig0029	jigsaw-2	mRNA	3280	3609	.	+	.	ID=HbmRNA00251;Parent=Hbgene00251
contig0029	jigsaw-2	CDS	3280	3609	20.3476	+	0	ID=Hbcds00251.1;Parent=HbmRNA00251
contig0029	jigsaw-2	gene	3911	6058	.	-	.	ID=Hbgene00252;Name=Hbgene00252
contig0029	jigsaw-2	mRNA	3911	6058	.	-	.	ID=HbmRNA00252;Parent=Hbgene00252
contig0029	jigsaw-2	CDS	3911	3999	31.3604	-	2	ID=Hbcds00252.1;Parent=HbmRNA00252
contig0029	jigsaw-2	CDS	4293	4295	0	-	2	ID=Hbcds00252.2;Parent=HbmRNA00252
contig0029	jigsaw-2	CDS	4475	4498	30.625	-	2	ID=Hbcds00252.3;Parent=HbmRNA00252
contig0029	jigsaw-2	CDS	4543	4563	32.0833	-	2	ID=Hbcds00252.4;Parent=HbmRNA00252
contig0029	jigsaw-2	CDS	4935	5069	4.70823	-	2	ID=Hbcds00252.5;Parent=HbmRNA00252
contig0029	jigsaw-2	CDS	5095	5288	-29.5735	-	1	ID=Hbcds00252.6;Parent=HbmRNA00252
contig0029	jigsaw-2	CDS	5585	5641	31.7667	-	1	ID=Hbcds00252.7;Parent=HbmRNA00252
contig0029	jigsaw-2	CDS	5719	5728	-36.7178	-	2	ID=Hbcds00252.8;Parent=HbmRNA00252
contig0029	jigsaw-2	CDS	5752	5902	30.3514	-	0	ID=Hbcds00252.9;Parent=HbmRNA00252
contig0029	jigsaw-2	CDS	5966	6058	31.1222	-	0	ID=Hbcds00252.10;Parent=HbmRNA00252
contig0029	jigsaw-2	gene	6117	6870	.	+	.	ID=Hbgene00253;Name=Hbgene00253
contig0029	jigsaw-2	mRNA	6117	6870	.	+	.	ID=HbmRNA00253;Parent=Hbgene00253
contig0029	jigsaw-2	CDS	6117	6127	28	+	0	ID=Hbcds00253.1;Parent=HbmRNA00253
contig0029	jigsaw-2	CDS	6166	6201	-13.1174	+	1	ID=Hbcds00253.2;Parent=HbmRNA00253
contig0029	jigsaw-2	CDS	6259	6337	19.3299	+	1	ID=Hbcds00253.3;Parent=HbmRNA00253
contig0029	jigsaw-2	CDS	6427	6449	-4.41339	+	0	ID=Hbcds00253.4;Parent=HbmRNA00253
contig0029	jigsaw-2	CDS	6534	6641	18.2025	+	1	ID=Hbcds00253.5;Parent=HbmRNA00253
contig0029	jigsaw-2	CDS	6656	6719	-25.0022	+	1	ID=Hbcds00253.6;Parent=HbmRNA00253
contig0029	jigsaw-2	CDS	6760	6870	20.93	+	0	ID=Hbcds00253.7;Parent=HbmRNA00253
contig0029	jigsaw-2	gene	6895	9044	.	+	.	ID=Hbgene00254;Name=Hbgene00254
contig0029	jigsaw-2	mRNA	6895	9044	.	+	.	ID=HbmRNA00254;Parent=Hbgene00254
contig0029	jigsaw-2	CDS	6895	6975	-0.158027	+	0	ID=Hbcds00254.1;Parent=HbmRNA00254
contig0029	jigsaw-2	CDS	7352	7416	17.5817	+	0	ID=Hbcds00254.2;Parent=HbmRNA00254
contig0029	jigsaw-2	CDS	7512	7691	0.776966	+	1	ID=Hbcds00254.3;Parent=HbmRNA00254
contig0029	jigsaw-2	CDS	7706	7758	4.16476	+	1	ID=Hbcds00254.4;Parent=HbmRNA00254
contig0029	jigsaw-2	CDS	7817	7909	8.59243	+	2	ID=Hbcds00254.5;Parent=HbmRNA00254
contig0029	jigsaw-2	CDS	8142	8210	-1.13865	+	2	ID=Hbcds00254.6;Parent=HbmRNA00254
contig0029	jigsaw-2	CDS	8354	8420	-33.0055	+	2	ID=Hbcds00254.7;Parent=HbmRNA00254
contig0029	jigsaw-2	CDS	8579	8670	-30.8369	+	1	ID=Hbcds00254.8;Parent=HbmRNA00254
contig0029	jigsaw-2	CDS	8706	8897	-30.8139	+	2	ID=Hbcds00254.9;Parent=HbmRNA00254
contig0029	jigsaw-2	CDS	9003	9004	0	+	2	ID=Hbcds00254.10;Parent=HbmRNA00254
contig0029	jigsaw-2	CDS	9030	9044	-7.00297	+	0	ID=Hbcds00254.11;Parent=HbmRNA00254
contig0029	jigsaw-2	gene	9290	10450	.	+	.	ID=Hbgene00255;Name=Hbgene00255
contig0029	jigsaw-2	mRNA	9290	10450	.	+	.	ID=HbmRNA00255;Parent=Hbgene00255
contig0029	jigsaw-2	CDS	9290	9296	-24.6836	+	0	ID=Hbcds00255.1;Parent=HbmRNA00255
contig0029	jigsaw-2	CDS	9483	9496	-36.939	+	2	ID=Hbcds00255.2;Parent=HbmRNA00255
contig0029	jigsaw-2	CDS	9607	9621	-36.939	+	0	ID=Hbcds00255.3;Parent=HbmRNA00255
contig0029	jigsaw-2	CDS	10174	10208	23.7775	+	0	ID=Hbcds00255.4;Parent=HbmRNA00255
contig0029	jigsaw-2	CDS	10316	10335	-31.9857	+	1	ID=Hbcds00255.5;Parent=HbmRNA00255
contig0029	jigsaw-2	CDS	10356	10450	22.3618	+	2	ID=Hbcds00255.6;Parent=HbmRNA00255
contig0029	jigsaw-2	gene	10556	10858	.	+	.	ID=Hbgene00256;Name=Hbgene00256
contig0029	jigsaw-2	mRNA	10556	10858	.	+	.	ID=HbmRNA00256;Parent=Hbgene00256
contig0029	jigsaw-2	CDS	10556	10584	14.4698	+	0	ID=Hbcds00256.1;Parent=HbmRNA00256
contig0029	jigsaw-2	CDS	10671	10724	-1.11039	+	1	ID=Hbcds00256.2;Parent=HbmRNA00256
contig0029	jigsaw-2	CDS	10759	10858	28.6582	+	1	ID=Hbcds00256.3;Parent=HbmRNA00256
contig0030	jigsaw-2	gene	10158	13619	.	+	.	ID=Hbgene00267;Name=Hbgene00267
contig0030	jigsaw-2	mRNA	10158	13619	.	+	.	ID=HbmRNA00267;Parent=Hbgene00267
contig0030	jigsaw-2	CDS	10158	10340	30.2708	+	0	ID=Hbcds00267.1;Parent=HbmRNA00267
contig0030	jigsaw-2	CDS	10904	10911	0	+	0	ID=Hbcds00267.2;Parent=HbmRNA00267
contig0030	jigsaw-2	CDS	10971	10996	29.1667	+	1	ID=Hbcds00267.3;Parent=HbmRNA00267
contig0030	jigsaw-2	CDS	11281	11352	-1.58322	+	2	ID=Hbcds00267.4;Parent=HbmRNA00267
contig0030	jigsaw-2	CDS	11385	11411	19.3889	+	2	ID=Hbcds00267.5;Parent=HbmRNA00267
contig0030	jigsaw-2	CDS	12218	12223	0	+	2	ID=Hbcds00267.6;Parent=HbmRNA00267
contig0030	jigsaw-2	CDS	12437	12472	15.1259	+	2	ID=Hbcds00267.7;Parent=HbmRNA00267
contig0030	jigsaw-2	CDS	12755	12880	-1.05828	+	2	ID=Hbcds00267.8;Parent=HbmRNA00267
contig0030	jigsaw-2	CDS	13160	13162	-27.2145	+	2	ID=Hbcds00267.9;Parent=HbmRNA00267
contig0030	jigsaw-2	CDS	13307	13322	-27.3495	+	2	ID=Hbcds00267.10;Parent=HbmRNA00267
contig0030	jigsaw-2	CDS	13544	13619	12.7462	+	1	ID=Hbcds00267.11;Parent=HbmRNA00267
contig0030	jigsaw-2	gene	15274	15914	.	+	.	ID=Hbgene00268;Name=Hbgene00268
contig0030	jigsaw-2	mRNA	15274	15914	.	+	.	ID=HbmRNA00268;Parent=Hbgene00268
contig0030	jigsaw-2	CDS	15274	15346	28.9227	+	0	ID=Hbcds00268.1;Parent=HbmRNA00268
contig0030	jigsaw-2	CDS	15696	15727	12.9018	+	2	ID=Hbcds00268.2;Parent=HbmRNA00268
contig0030	jigsaw-2	CDS	15861	15914	-25.7182	+	0	ID=Hbcds00268.3;Parent=HbmRNA00268
contig0030	jigsaw-2	gene	546	2590	.	-	.	ID=Hbgene00259;Name=Hbgene00259
contig0030	jigsaw-2	mRNA	546	2590	.	-	.	ID=HbmRNA00259;Parent=Hbgene00259
contig0030	jigsaw-2	CDS	546	675	31.8051	-	1	ID=Hbcds00259.1;Parent=HbmRNA00259
contig0030	jigsaw-2	CDS	905	929	29.6619	-	2	ID=Hbcds00259.2;Parent=HbmRNA00259
contig0030	jigsaw-2	CDS	1144	1197	30.5319	-	2	ID=Hbcds00259.3;Parent=HbmRNA00259
contig0030	jigsaw-2	CDS	1295	1396	31.6153	-	2	ID=Hbcds00259.4;Parent=HbmRNA00259
contig0030	jigsaw-2	CDS	1620	1695	-34.7516	-	0	ID=Hbcds00259.5;Parent=HbmRNA00259
contig0030	jigsaw-2	CDS	1759	1783	22.7467	-	1	ID=Hbcds00259.6;Parent=HbmRNA00259
contig0030	jigsaw-2	CDS	1999	2013	-42.5	-	1	ID=Hbcds00259.7;Parent=HbmRNA00259
contig0030	jigsaw-2	CDS	2284	2396	31.5346	-	0	ID=Hbcds00259.8;Parent=HbmRNA00259
contig0030	jigsaw-2	CDS	2522	2590	22.7325	-	0	ID=Hbcds00259.9;Parent=HbmRNA00259
contig0030	jigsaw-2	gene	2999	3182	.	+	.	ID=Hbgene00260;Name=Hbgene00260
contig0030	jigsaw-2	mRNA	2999	3182	.	+	.	ID=HbmRNA00260;Parent=Hbgene00260
contig0030	jigsaw-2	CDS	2999	3120	-2.58045	+	0	ID=Hbcds00260.1;Parent=HbmRNA00260
contig0030	jigsaw-2	CDS	3173	3182	17	+	1	ID=Hbcds00260.2;Parent=HbmRNA00260
contig0030	jigsaw-2	gene	3230	4834	.	-	.	ID=Hbgene00261;Name=Hbgene00261
contig0030	jigsaw-2	mRNA	3230	4834	.	-	.	ID=HbmRNA00261;Parent=Hbgene00261
contig0030	jigsaw-2	CDS	3230	3248	27.2879	-	1	ID=Hbcds00261.1;Parent=HbmRNA00261
contig0030	jigsaw-2	CDS	3272	3358	31.6573	-	1	ID=Hbcds00261.2;Parent=HbmRNA00261
contig0030	jigsaw-2	CDS	3379	3484	32.3654	-	2	ID=Hbcds00261.3;Parent=HbmRNA00261
contig0030	jigsaw-2	CDS	3633	3741	31.6779	-	0	ID=Hbcds00261.4;Parent=HbmRNA00261
contig0030	jigsaw-2	CDS	4663	4740	31.2826	-	0	ID=Hbcds00261.5;Parent=HbmRNA00261
contig0030	jigsaw-2	CDS	4787	4834	30.2814	-	0	ID=Hbcds00261.6;Parent=HbmRNA00261
contig0030	jigsaw-2	gene	5923	7418	.	-	.	ID=Hbgene00262;Name=Hbgene00262
contig0030	jigsaw-2	mRNA	5923	7418	.	-	.	ID=HbmRNA00262;Parent=Hbgene00262
contig0030	jigsaw-2	CDS	5923	6062	33.3356	-	2	ID=Hbcds00262.1;Parent=HbmRNA00262
contig0030	jigsaw-2	CDS	6650	6691	-35	-	2	ID=Hbcds00262.2;Parent=HbmRNA00262
contig0030	jigsaw-2	CDS	6816	6868	30.104	-	1	ID=Hbcds00262.3;Parent=HbmRNA00262
contig0030	jigsaw-2	CDS	7145	7203	32.4513	-	0	ID=Hbcds00262.4;Parent=HbmRNA00262
contig0030	jigsaw-2	CDS	7296	7418	29.4602	-	0	ID=Hbcds00262.5;Parent=HbmRNA00262
contig0030	jigsaw-2	gene	7515	7826	.	+	.	ID=Hbgene00263;Name=Hbgene00263
contig0030	jigsaw-2	mRNA	7515	7826	.	+	.	ID=HbmRNA00263;Parent=Hbgene00263
contig0030	jigsaw-2	CDS	7515	7559	-0.879091	+	0	ID=Hbcds00263.1;Parent=HbmRNA00263
contig0030	jigsaw-2	CDS	7782	7826	18.9498	+	0	ID=Hbcds00263.2;Parent=HbmRNA00263
contig0030	jigsaw-2	gene	7914	8333	.	-	.	ID=Hbgene00264;Name=Hbgene00264
contig0030	jigsaw-2	mRNA	7914	8333	.	-	.	ID=HbmRNA00264;Parent=Hbgene00264
contig0030	jigsaw-2	CDS	7914	7989	23.7632	-	1	ID=Hbcds00264.1;Parent=HbmRNA00264
contig0030	jigsaw-2	CDS	8219	8296	-29.9619	-	1	ID=Hbcds00264.2;Parent=HbmRNA00264
contig0030	jigsaw-2	CDS	8326	8333	26.2901	-	0	ID=Hbcds00264.3;Parent=HbmRNA00264
contig0030	jigsaw-2	gene	8607	8866	.	-	.	ID=Hbgene00265;Name=Hbgene00265
contig0030	jigsaw-2	mRNA	8607	8866	.	-	.	ID=HbmRNA00265;Parent=Hbgene00265
contig0030	jigsaw-2	CDS	8607	8609	0	-	0	ID=Hbcds00265.1;Parent=HbmRNA00265
contig0030	jigsaw-2	CDS	8786	8866	23.0185	-	0	ID=Hbcds00265.2;Parent=HbmRNA00265
contig0030	jigsaw-2	gene	9835	10009	.	+	.	ID=Hbgene00266;Name=Hbgene00266
contig0030	jigsaw-2	mRNA	9835	10009	.	+	.	ID=HbmRNA00266;Parent=Hbgene00266
contig0030	jigsaw-2	CDS	9835	9961	14.9104	+	0	ID=Hbcds00266.1;Parent=HbmRNA00266
contig0030	jigsaw-2	CDS	9981	10009	8.62997	+	2	ID=Hbcds00266.2;Parent=HbmRNA00266
contig0031	jigsaw-2	gene	256	758	.	+	.	ID=Hbgene00269;Name=Hbgene00269
contig0031	jigsaw-2	mRNA	256	758	.	+	.	ID=HbmRNA00269;Parent=Hbgene00269
contig0031	jigsaw-2	CDS	256	288	19.4242	+	0	ID=Hbcds00269.1;Parent=HbmRNA00269
contig0031	jigsaw-2	CDS	309	339	33.871	+	0	ID=Hbcds00269.2;Parent=HbmRNA00269
contig0031	jigsaw-2	CDS	363	408	-28.0241	+	2	ID=Hbcds00269.3;Parent=HbmRNA00269
contig0031	jigsaw-2	CDS	434	443	-30.7937	+	1	ID=Hbcds00269.4;Parent=HbmRNA00269
contig0031	jigsaw-2	CDS	456	489	27.4587	+	0	ID=Hbcds00269.5;Parent=HbmRNA00269
contig0031	jigsaw-2	CDS	501	553	34.3037	+	2	ID=Hbcds00269.6;Parent=HbmRNA00269
contig0031	jigsaw-2	CDS	569	636	34.3936	+	0	ID=Hbcds00269.7;Parent=HbmRNA00269
contig0031	jigsaw-2	CDS	650	758	32.7204	+	1	ID=Hbcds00269.8;Parent=HbmRNA00269
contig0031	jigsaw-2	gene	806	996	.	+	.	ID=Hbgene00270;Name=Hbgene00270
contig0031	jigsaw-2	mRNA	806	996	.	+	.	ID=HbmRNA00270;Parent=Hbgene00270
contig0031	jigsaw-2	CDS	806	895	33.9354	+	0	ID=Hbcds00270.1;Parent=HbmRNA00270
contig0031	jigsaw-2	CDS	907	930	33.5417	+	0	ID=Hbcds00270.2;Parent=HbmRNA00270
contig0031	jigsaw-2	CDS	955	996	34.1429	+	0	ID=Hbcds00270.3;Parent=HbmRNA00270
contig0031	jigsaw-2	gene	1014	1092	.	+	.	ID=Hbgene00271;Name=Hbgene00271
contig0031	jigsaw-2	mRNA	1014	1092	.	+	.	ID=HbmRNA00271;Parent=Hbgene00271
contig0031	jigsaw-2	CDS	1014	1092	34.5212	+	0	ID=Hbcds00271.1;Parent=HbmRNA00271
contig0032	jigsaw-2	gene	9	869	.	-	.	ID=Hbgene00272;Name=Hbgene00272
contig0032	jigsaw-2	mRNA	9	869	.	-	.	ID=HbmRNA00272;Parent=Hbgene00272
contig0032	jigsaw-2	CDS	9	284	-25.1828	-	0	ID=Hbcds00272.1;Parent=HbmRNA00272
contig0032	jigsaw-2	CDS	297	301	-34.531	-	2	ID=Hbcds00272.2;Parent=HbmRNA00272
contig0032	jigsaw-2	CDS	323	869	1.90916	-	0	ID=Hbcds00272.3;Parent=HbmRNA00272
contig0032	jigsaw-2	gene	913	1131	.	+	.	ID=Hbgene00273;Name=Hbgene00273
contig0032	jigsaw-2	mRNA	913	1131	.	+	.	ID=HbmRNA00273;Parent=Hbgene00273
contig0032	jigsaw-2	CDS	913	921	-9.32247	+	0	ID=Hbcds00273.1;Parent=HbmRNA00273
contig0032	jigsaw-2	CDS	991	1131	2.12827	+	0	ID=Hbcds00273.2;Parent=HbmRNA00273
contig0033	jigsaw-2	gene	47	234	.	+	.	ID=Hbgene00274;Name=Hbgene00274
contig0033	jigsaw-2	mRNA	47	234	.	+	.	ID=HbmRNA00274;Parent=Hbgene00274
contig0033	jigsaw-2	CDS	47	79	15.2343	+	0	ID=Hbcds00274.1;Parent=HbmRNA00274
contig0033	jigsaw-2	CDS	91	234	34.7116	+	0	ID=Hbcds00274.2;Parent=HbmRNA00274
contig0033	jigsaw-2	gene	516	1437	.	+	.	ID=Hbgene00275;Name=Hbgene00275
contig0033	jigsaw-2	mRNA	516	1437	.	+	.	ID=HbmRNA00275;Parent=Hbgene00275
contig0033	jigsaw-2	CDS	516	534	0.581682	+	0	ID=Hbcds00275.1;Parent=HbmRNA00275
contig0033	jigsaw-2	CDS	548	629	-27.812	+	2	ID=Hbcds00275.2;Parent=HbmRNA00275
contig0033	jigsaw-2	CDS	640	703	-28.4634	+	1	ID=Hbcds00275.3;Parent=HbmRNA00275
contig0033	jigsaw-2	CDS	734	772	-29.2076	+	0	ID=Hbcds00275.4;Parent=HbmRNA00275
contig0033	jigsaw-2	CDS	794	851	-29.8058	+	0	ID=Hbcds00275.5;Parent=HbmRNA00275
contig0033	jigsaw-2	CDS	867	871	-32.1015	+	2	ID=Hbcds00275.6;Parent=HbmRNA00275
contig0033	jigsaw-2	CDS	900	915	-33.5499	+	0	ID=Hbcds00275.7;Parent=HbmRNA00275
contig0033	jigsaw-2	CDS	928	1058	-30.6662	+	2	ID=Hbcds00275.8;Parent=HbmRNA00275
contig0033	jigsaw-2	CDS	1099	1109	-34.7284	+	0	ID=Hbcds00275.9;Parent=HbmRNA00275
contig0033	jigsaw-2	CDS	1156	1159	-41.0958	+	1	ID=Hbcds00275.10;Parent=HbmRNA00275
contig0033	jigsaw-2	CDS	1184	1203	-32.5482	+	0	ID=Hbcds00275.11;Parent=HbmRNA00275
contig0033	jigsaw-2	CDS	1217	1217	-26.3899	+	1	ID=Hbcds00275.12;Parent=HbmRNA00275
contig0033	jigsaw-2	CDS	1239	1255	-32.4491	+	0	ID=Hbcds00275.13;Parent=HbmRNA00275
contig0033	jigsaw-2	CDS	1268	1281	-34.1065	+	1	ID=Hbcds00275.14;Parent=HbmRNA00275
contig0033	jigsaw-2	CDS	1305	1309	-31.9181	+	2	ID=Hbcds00275.15;Parent=HbmRNA00275
contig0033	jigsaw-2	CDS	1328	1371	-29.8205	+	0	ID=Hbcds00275.16;Parent=HbmRNA00275
contig0033	jigsaw-2	CDS	1392	1437	6.4082	+	1	ID=Hbcds00275.17;Parent=HbmRNA00275
contig0034	jigsaw-2	gene	139	2069	.	-	.	ID=Hbgene00276;Name=Hbgene00276
contig0034	jigsaw-2	mRNA	139	2069	.	-	.	ID=HbmRNA00276;Parent=Hbgene00276
contig0034	jigsaw-2	CDS	139	230	33.4707	-	2	ID=Hbcds00276.1;Parent=HbmRNA00276
contig0034	jigsaw-2	CDS	519	545	30.011	-	2	ID=Hbcds00276.2;Parent=HbmRNA00276
contig0034	jigsaw-2	CDS	597	649	32.0205	-	1	ID=Hbcds00276.3;Parent=HbmRNA00276
contig0034	jigsaw-2	CDS	871	925	33.1347	-	2	ID=Hbcds00276.4;Parent=HbmRNA00276
contig0034	jigsaw-2	CDS	992	1017	32.3077	-	1	ID=Hbcds00276.5;Parent=HbmRNA00276
contig0034	jigsaw-2	CDS	1142	1187	33.1008	-	2	ID=Hbcds00276.6;Parent=HbmRNA00276
contig0034	jigsaw-2	CDS	1250	1276	29.877	-	2	ID=Hbcds00276.7;Parent=HbmRNA00276
contig0034	jigsaw-2	CDS	1404	1454	32.9916	-	2	ID=Hbcds00276.8;Parent=HbmRNA00276
contig0034	jigsaw-2	CDS	1554	1597	31.9018	-	1	ID=Hbcds00276.9;Parent=HbmRNA00276
contig0034	jigsaw-2	CDS	1767	1969	34.2894	-	0	ID=Hbcds00276.10;Parent=HbmRNA00276
contig0034	jigsaw-2	CDS	2004	2069	29.1593	-	0	ID=Hbcds00276.11;Parent=HbmRNA00276
contig0034	jigsaw-2	gene	2345	3064	.	+	.	ID=Hbgene00277;Name=Hbgene00277
contig0034	jigsaw-2	mRNA	2345	3064	.	+	.	ID=HbmRNA00277;Parent=Hbgene00277
contig0034	jigsaw-2	CDS	2345	2347	0	+	0	ID=Hbcds00277.1;Parent=HbmRNA00277
contig0034	jigsaw-2	CDS	2524	2587	-0.60754	+	0	ID=Hbcds00277.2;Parent=HbmRNA00277
contig0034	jigsaw-2	CDS	2954	2974	18.0865	+	2	ID=Hbcds00277.3;Parent=HbmRNA00277
contig0034	jigsaw-2	CDS	3060	3064	-18.913	+	2	ID=Hbcds00277.4;Parent=HbmRNA00277
contig0034	jigsaw-2	gene	3137	3626	.	+	.	ID=Hbgene00278;Name=Hbgene00278
contig0034	jigsaw-2	mRNA	3137	3626	.	+	.	ID=HbmRNA00278;Parent=Hbgene00278
contig0034	jigsaw-2	CDS	3137	3141	23.3333	+	0	ID=Hbcds00278.1;Parent=HbmRNA00278
contig0034	jigsaw-2	CDS	3167	3303	5.66783	+	1	ID=Hbcds00278.2;Parent=HbmRNA00278
contig0034	jigsaw-2	CDS	3598	3626	-7.41699	+	2	ID=Hbcds00278.3;Parent=HbmRNA00278
contig0034	jigsaw-2	gene	3657	5515	.	-	.	ID=Hbgene00279;Name=Hbgene00279
contig0034	jigsaw-2	mRNA	3657	5515	.	-	.	ID=HbmRNA00279;Parent=Hbgene00279
contig0034	jigsaw-2	CDS	3657	3697	30.8977	-	2	ID=Hbcds00279.1;Parent=HbmRNA00279
contig0034	jigsaw-2	CDS	3752	3879	-12.6687	-	1	ID=Hbcds00279.2;Parent=HbmRNA00279
contig0034	jigsaw-2	CDS	3955	3990	-32.8131	-	1	ID=Hbcds00279.3;Parent=HbmRNA00279
contig0034	jigsaw-2	CDS	4002	4106	-30.395	-	1	ID=Hbcds00279.4;Parent=HbmRNA00279
contig0034	jigsaw-2	CDS	4163	4272	33.1368	-	0	ID=Hbcds00279.5;Parent=HbmRNA00279
contig0034	jigsaw-2	CDS	4496	4529	32.7063	-	1	ID=Hbcds00279.6;Parent=HbmRNA00279
contig0034	jigsaw-2	CDS	4628	4659	31.0459	-	0	ID=Hbcds00279.7;Parent=HbmRNA00279
contig0034	jigsaw-2	CDS	4757	4872	-30.6576	-	2	ID=Hbcds00279.8;Parent=HbmRNA00279
contig0034	jigsaw-2	CDS	4900	4970	-29.9182	-	1	ID=Hbcds00279.9;Parent=HbmRNA00279
contig0034	jigsaw-2	CDS	5033	5040	-28.8697	-	0	ID=Hbcds00279.10;Parent=HbmRNA00279
contig0034	jigsaw-2	CDS	5184	5361	32.009	-	1	ID=Hbcds00279.11;Parent=HbmRNA00279
contig0034	jigsaw-2	CDS	5406	5515	30.7346	-	0	ID=Hbcds00279.12;Parent=HbmRNA00279
contig0034	jigsaw-2	gene	6409	6885	.	+	.	ID=Hbgene00280;Name=Hbgene00280
contig0034	jigsaw-2	mRNA	6409	6885	.	+	.	ID=HbmRNA00280;Parent=Hbgene00280
[truncated: 165,289 more rows]
